# Supplementary material for: Synthesis and in silico screening of a library of β-carboline-containing compounds
Source: publisher site journal article supplement (doi:10.3762/bjoc.8.117), 2012-07-10

# **Supporting Information**

## **for**

### **Synthesis and in silico screening of a library of $\beta$ -carboline-containing compounds**

Kay M. Brummond<sup>1\*</sup>, John R. Goodell<sup>1</sup>, Matthew G. LaPorte<sup>1\*</sup>, Lirong Wang<sup>2</sup> and Xiang-Qun Xie<sup>2\*</sup>

Address: <sup>1</sup>Department of Chemistry, Chemical Methodologies and Library Development, University of Pittsburgh, Pittsburgh, Pennsylvania 15260 and <sup>2</sup>Department of Pharmaceutical Sciences and Computational Chemical Genomics Center, School of Pharmacy; Drug Discovery Institute; Department of Computational Biology; University of Pittsburgh, Pittsburgh, Pennsylvania 15260

Email: Kay M. Brummond - kbrummon@pitt.edu, Matthew G. LaPorte - mgl12@pitt.edu, Xiang-Qun Xie - xix15@pitt.edu

\*Corresponding author

Experimental procedures and spectral data for compounds **1{5}**, **1{16}**, **2{1,3–8}**, **3{1,2–4}**, **4**, **6{1–10}**, **6{12–13}**, **6{15}**, **7{1–7}**, **9{1,2–4}**.

#### **Table of Contents**

|                                                                                                                                                                                    |     |
|------------------------------------------------------------------------------------------------------------------------------------------------------------------------------------|-----|
| General.....                                                                                                                                                                       | S2  |
| Preparation of <b>1{5}</b> , <b>1{16}</b> , <b>2{1,3–8}</b> , <b>3{1,2–4}</b> , <b>4</b> , <b>6{1–10}</b> , <b>6{12–13}</b> , <b>6{15}</b> , <b>7{1–7}</b> , <b>9{1,2–4}</b> ..... | S2  |
| Spectral data.....                                                                                                                                                                 | S23 |

**General.** All reactions were performed under an argon atmosphere and all glassware was dried in an oven at 140 °C for 24 h prior to use. THF, CH<sub>2</sub>Cl<sub>2</sub> and toluene were purified using an alumina column filtration system. DMF, MeOH, acetone and CH<sub>3</sub>CN were dried over activated 3 or 4 Å molecular sieves. Et<sub>3</sub>N was distilled from CaH<sub>2</sub> and stored over KOH. Reactions were monitored by TLC analysis (precoated silica gel 60 F254 plates, 250 µm layer thickness) and visualization was accomplished with a 254 nm UV light and by staining with a Vaughn's reagent (4.8 g of (NH<sub>4</sub>)<sub>6</sub>Mo<sub>7</sub>O<sub>24</sub>·4H<sub>2</sub>O and 0.2 g of Ce(SO<sub>4</sub>)<sub>2</sub> in 100 mL of a 3.5 N H<sub>2</sub>SO<sub>4</sub> solution) or a KMnO<sub>4</sub> solution (1.5 g of KMnO<sub>4</sub> and 1.5 g of K<sub>2</sub>CO<sub>3</sub> in 100 mL of a 0.1% NaOH solution). Flash chromatography or preparative TLC on SiO<sub>2</sub> was used to purify the crude reaction mixtures. <sup>1</sup>H/<sup>13</sup>C NMR spectra were recorded on either a Bruker Avance 300/75 MHz or Bruker Avance 400/100 MHz instrument. Chemical shifts were reported in parts per million with the residual solvent peak used as an internal standard. Chemical shifts were tabulated as follows: Chemical shift, multiplicity (s = singlet, d = doublet, t = triplet, q = quartet, m = multiplet, ovrlp = overlapping, app = apparent), coupling constants, and integration. Microwave reactions were performed using a Biotage Initiator in glass microwave vials (cap sealed) with continuous magnetic stirring and an external surface temperature sensor. Mass spectra were obtained on a Micromass Autospec double focusing instrument. Infrared spectra were measured on a Smiths Detection IdentifyIR FTIR spectrometer (ATR). Melting points (uncorrected) were determined using a Mel-Temp instrument.

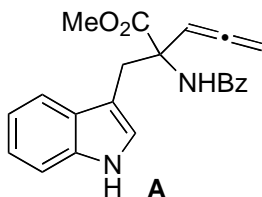

**(±)-Methyl 2-((1*H*-indol-3-yl)methyl)-2-benzamidopenta-3,4-dienoate (A) [S1]**

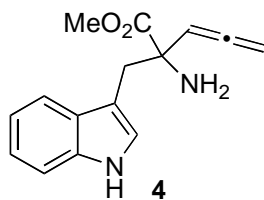

**(±)-Methyl 2-((1*H*-indol-3-yl)methyl)-2-aminopenta-3,4-dienoate (4)** [S1]

To a solution of benzamide **A** (3.60 g, 9.93 mmol) in CH<sub>2</sub>Cl<sub>2</sub> (180 mL) was added Et<sub>3</sub>OBF<sub>4</sub> (3.77 g, 19.9 mmol) in CH<sub>2</sub>Cl<sub>2</sub> (14 mL). The mixture was stirred at rt overnight. The reaction was concentrated in vacuo and diluted with THF (8 mL) and 5% acetic acid (aq) (70 mL) and stirred for 4 h. The reaction was quenched with the addition of saturated K<sub>2</sub>CO<sub>3</sub> and stirred for 10 min. The resulting mixture was diluted with water and extracted with EtOAc (3 x 30 mL). The combined organic layers were washed with brine, dried over MgSO<sub>4</sub>, filtered, and concentrated in vacuo. The resulting residue was purified by chromatography (SiO<sub>2</sub>, ISCO-Rf, 50–80% EtOAc:hexane) to afford amine **4** (1.20 g, 47%) as a viscous brown oil. *R*<sub>f</sub> 0.23 (hexane:EtOAc, 1:4), <sup>1</sup>H NMR (300 MHz, CDCl<sub>3</sub>) δ 8.30 (br s, 1 H), 7.67 (d, *J* = 7.8 Hz, 1 H), 7.35 (d, *J* = 8.1 Hz, 1 H), 7.29–7.08 (m, 3 H), 5.63 (t, *J* = 6.6 Hz, 1 H), 4.97 (d, *J* = 6.6 Hz, 2 H), 3.71 (s, 3 H), 3.47 (A of an ABq, *J* = 14.1 Hz, 1 H), 3.15 (B of an ABq, *J* = 14.1 Hz, 1 H), 1.91 (br s, 2 H); <sup>13</sup>C NMR (100 MHz, CDCl<sub>3</sub>) δ 206.4, 175.5, 135.9, 127.9, 123.7, 121.8, 119.4, 119.0, 111.1, 109.7, 96.3, 79.4, 61.0, 52.3, 35.6.

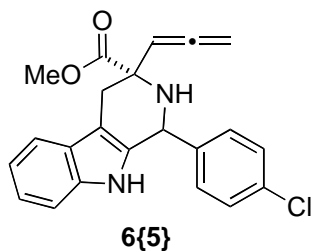

**(±)-(3*S*)-Methyl 1-(4-chlorophenyl)-3-(propa-1,2-dien-1-yl)-2,3,4,9-tetrahydro-1*H*-pyrido [3,4-*b*]indole-3-carboxylate (6{5})**. To a solution of amine **4** (0.100 g, 0.390 mmol) in MeOH (4 mL) was added activated 4 Å molecular sieves (185 mg, 470 mg/mmol), 4-chlorobenzaldehyde (0.055 g, 0.390 mmol), and trifluoroacetic acid (0.029 mL, 0.390 mmol). After 3 h, the reaction was filtered through Celite and the filtrate was treated with saturated NaHCO<sub>3</sub> (~1 mL) and stirred for 5 min. The resulting solution was extracted with CH<sub>2</sub>Cl<sub>2</sub> (3 x

5 mL). The organic fractions were combined, washed with brine, dried over MgSO<sub>4</sub>, filtered, and concentrated in vacuo. The resulting residue was purified by flash chromatography (SiO<sub>2</sub>, 10–20% EtOAc:hexane) to afford **6{5}** (77.5 mg, 52%, dr 2:1 by <sup>1</sup>H NMR) as an off-white amorphous solid, which turned yellow upon storage. *R*<sub>f</sub> 0.49 (hexane:EtOAc, 4:1); <sup>1</sup>H NMR (400 MHz, CDCl<sub>3</sub>) δ 7.58–7.53 (m, 1.5 H), 7.41–7.29 (m, 7.5 H), 7.25–7.18 (m, 1.5 H), 7.18–7.09 (m, 3 H), 5.51–5.46 (m, 1 H), 5.42 (t, *J* = 1.9 Hz, 0.5 H)\*, 5.35 (t, *J* = 6.7 Hz, 0.5 H)\*, 5.23 (t, *J* = 2.0 Hz, 1 H), 5.01 (d, *J* = 6.0 Hz, 1 H)\*, 4.91 (dd, *J* = 11.3, 6.5 Hz, 1 H), 4.73 (dd, *J* = 11.3, 6.5 Hz, 1 H), 3.83 (s, 3 H), 3.67–3.61 (m, 2 H)\*, 3.30–3.24 (m, 2 H), 3.04 (dd, *J* = 15.2, 2.6 Hz, 0.5 H)\*, 2.80 (br s, 1 H). \* Denotes *syn*-product.

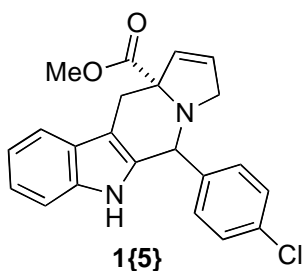

**(±)-Methyl 5-(4-chlorophenyl)-5,6,11,11a-tetrahydro-3H-indolizino[6,7-b]indole-11a-carboxylate (1{5}).** To a solution of allene **6{5}** (70 mg, 0.185 mmol, as a 2:1 mixture of diastereomers) in acetone (3.6 mL) in a septum-sealed 10 mL reaction vial wrapped in aluminum foil, was added silver nitrate (6.3 mg, 0.037 mmol, 20 mol %, weighed and transferred under low light). The reaction mixture was protected from light and stirred for 18 h. The reaction mixture was diluted with CH<sub>2</sub>Cl<sub>2</sub> and washed with saturated NaHCO<sub>3</sub> (2 x). The combined aqueous layers were back-extracted with CH<sub>2</sub>Cl<sub>2</sub> (2 x) and the combined organic layers dried over MgSO<sub>4</sub>, filtered, and concentrated in vacuo. The residue was purified using flash chromatography (SiO<sub>2</sub>, hexane:acetone, 20:1) to afford **1{5}**-*syn* (13.4 mg, 19%) and **1{5}**-*anti* (16.4 mg, 23%) as amorphous white residues, which turned yellow during concentration. **1{5}**-*syn*: *R*<sub>f</sub> 0.1 (hexane:acetone, 20:1); <sup>1</sup>H NMR (300 MHz, CDCl<sub>3</sub>) δ 7.58–7.55 (m, 1 H), 7.43–7.31 (m, 5 H), 7.22–7.16 (m, 1 H), 7.15–7.12 (m, 2 H), 6.14–6.11 (m, 1 H), 6.04–6.01 (m, 1 H), 5.50 (s, 1 H), 3.82–3.69 (m, 2 H), 3.57 (s, 3 H), 3.47 (d, *J* = 13.2 Hz, 1 H), 3.01 (dd, *J* = 14.3, 2.8 Hz, 1 H); LCMS *m/z*: 379.4 (*t*<sub>R</sub> = 10.13 min); **1{5}**-*anti*: *R*<sub>f</sub> 0.07 (hexane:acetone, 20:1); <sup>1</sup>H NMR



(300 MHz, CDCl<sub>3</sub>)  $\delta$  7.60–7.54 (m, 3 H), 7.44–7.34 (m, 3 H), 7.28–7.22 (m, 1 H), 7.15–7.12 (m, 2 H), 6.04–5.96 (m, 2 H), 5.04 (s, 1 H), 4.12 (d,  $J$  = 13.9 Hz, 1 H), 3.87–3.77 (m, 2 H), 3.47 (s, 3 H), 2.79 (dd,  $J$  = 14.7, 1.5 Hz, 1 H).

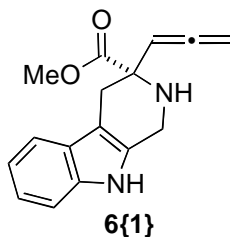

(±)-Methyl 3-(propa-1,2-dien-1-yl)-2,3,4,9-tetrahydro-1H-pyrido[3,4-*b*]indole-3-carboxylate (**6{1}**). To a solution of amine **4** (0.763 g, 2.98 mmol) in MeOH (18 mL) was added formaldehyde 37% (0.268 mL, 3.57 mmol), and trifluoroacetic acid (0.22 mL, 2.98 mmol). The reaction mixture was stirred at rt. After 16 h, the reaction mixture was quenched with saturated NaHCO<sub>3</sub> (~12 mL) and stirred for 5 min. The resulting solution was extracted with CH<sub>2</sub>Cl<sub>2</sub> (3 x 10 mL). The combined organic fractions were washed with brine, dried over MgSO<sub>4</sub>, filtered, and concentrated in vacuo. The resulting residue was purified by chromatography (SiO<sub>2</sub>, ISCO-Rf, 50–80%, EtOAc:hexane) to afford **6{1}** (545 mg, 68%) as a yellow/tan amorphous oil/foam.  $R_f$  0.23 (hexane:EtOAc, 1:4); <sup>1</sup>H NMR (300 MHz, CDCl<sub>3</sub>)  $\delta$  7.90 (s, 1 H), 7.52 (d,  $J$  = 6.9 Hz, 1 H), 7.29–7.19 (m, 1 H), 7.17–7.12 (m, 2 H), 5.40 (dd,  $J$  = 6.6, 13.2 Hz, 1 H), 4.96 (dd,  $J$  = 6.9, 11.4 Hz, 1 H), 4.88 (dd,  $J$  = 6.4, 11.1, 1 H), 4.16 (A of an ABq,  $J$  = 15.6 Hz, 1 H), 4.10 (B of an ABq,  $J$  = 15.6 Hz, 1 H), 3.73 (s, 3 H), 3.38 (A of an ABq,  $J$  = 15.3 Hz, 1 H), 3.04 (B of an ABq,  $J$  = 15.6 Hz, 1 H), 2.51 (br s, 1 H); <sup>13</sup>C NMR (100 MHz, CDCl<sub>3</sub>)  $\delta$  207.2, 173.9, 136.2, 130.9, 127.2, 121.4, 119.2, 117.8, 110.7, 106.6, 94.0, 79.3, 60.6, 52.5, 39.8, 29.7.

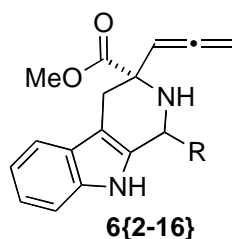

**General procedure for (±)-allenes 6{2–16}.** To a solution of amine **4** (0.076 g, 0.297 mmol) in CH<sub>2</sub>Cl<sub>2</sub> (2 mL) was added aldehyde (0.322 mmol, 1.1 equiv), and trifluoroacetic acid (0.024 mL, 0.322 mmol, 1.1 equiv). The reaction mixture was stirred 2 h at rt. The reaction was quenched with saturated NaHCO<sub>3</sub> (~1 mL) and stirred for 5 min. The resulting solution was extracted with CH<sub>2</sub>Cl<sub>2</sub> (3 x 5 mL). The combined organic fractions were washed with brine, dried over MgSO<sub>4</sub>, filtered, and concentrated in vacuo. The resulting residue was purified by chromatography (SiO<sub>2</sub>, ISCO-Rf, variable EtOAc:hexane gradients) to afford allenes. Products were characterized by <sup>1</sup>H NMR (see spectral data) to determine dr then used directly in next reaction step.

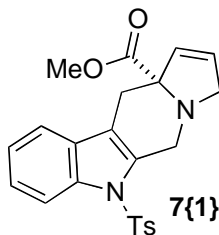

**General procedure 7{1–7}: (±)-Methyl 6-tosyl-5,6,11,11a-tetrahydro-3H-indolizino[6,7-b]indole-11a-carboxylate (7{1}).** To a solution of allene **6{1}** (43 mg, 0.16 mmol) in acetone (2 mL) in a septum-sealed reaction vial wrapped in aluminum foil, was added silver nitrate (5.0 mg, 0.032 mmol, 20 mol %, weighed and transferred under low light). The reaction was then degassed by bubbling argon for 15 min. The reaction mixture was protected from light and stirred at rt for 18 h. The reaction mixture was diluted with CH<sub>2</sub>Cl<sub>2</sub>, washed with saturated NaHCO<sub>3</sub>, brine, dried over MgSO<sub>4</sub>, filtered, and concentrated in vacuo. The resulting residue was passed through a short column (SiO<sub>2</sub>, EtOAc:hex, 1:1) to afford the crude cyclized product, which was used directly in the next step [S2]. To a dry 1 dram vial was added dissolved carboline (0.162 mmol) in CH<sub>2</sub>Cl<sub>2</sub> (0.25 mL) followed by addition of crushed NaOH (10 mg, 0.26 mmol), TEBA (4 mg, 0.016 mmol), and *p*-toluene sulfonyl chloride (37 mg, 0.19 mmol). The reaction

mixture was sonicated at rt for 1 h. The reaction was filtered through a short silica plug, washed with hexane:EtOAc (1:1), and concentrated in vacuo. The resulting residue was purified by flash chromatography (SiO<sub>2</sub>, hexane:EtOAc, 4:1–1:1) followed by preparative TLC (EtOAc:hexane, 1:1) to afford tosylated carboline **7{1}** (19.4 mg, 28%) as a pale yellow amorphous foam/oil. *R*<sub>f</sub> 0.85 (hexane:EtOAc, 1:2); IR (neat): 1724, 1450, 1364, 1215, 1167, 1152, 1122, 1088, 973, 755, 745, 703, 660 cm<sup>-1</sup>; <sup>1</sup>H NMR (400 MHz, CDCl<sub>3</sub>) δ 8.09 (d, *J* = 8.0 Hz, 1 H), 7.68 (d, *J* = 8.0 Hz, 2 H), 7.40 (d, *J* = 8.0 Hz, 1 H), 7.32–7.26 (m, 1 H), 7.25–7.23 (m, 1 H), 7.19 (d, *J* = 8.4 Hz, 2 H), 6.22 (dd, *J* = 2.0, 6.0, 1 H), 5.99 (d, *J* = 6.0, 1 H), 4.62 (A of an ABq, *J* = 16.4 Hz, 1 H), 4.45 (B of an ABq, *J* = 16.8 Hz, 1 H), 4.04 (A of an ABq, *J* = 13.2 Hz, 1 H), 3.93 (B of an ABq, *J* = 12.8 Hz, 1 H), 3.53 (ovlp s, 3 H), 3.55 (ovlp A of an ABq, *J* = 15.2 Hz, 1 H), 2.74 (B of an ABq, *J* = 15.2 Hz, 1 H), 2.34 (s, 3 H); <sup>13</sup>C NMR (100 MHz, CDCl<sub>3</sub>) δ 173.9, 144.7, 136.4, 135.5, 133.6, 132.0, 131.2, 130.0, 129.8, 129.7, 126.5, 126.4, 124.3, 123.3, 118.3, 116.4, 114.2, 71.8, 56.9, 51.7, 45.4, 31.6, 29.5, 22.6, 21.5, 14.1; HRMS (TOF-ES<sup>+</sup>) (*m/z*): [M + H]<sup>+</sup> calcd for C<sub>23</sub>H<sub>23</sub>N<sub>2</sub>O<sub>4</sub>S, 423.1379; found, 423.1378.

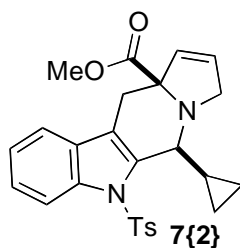

(±)-Methyl 5-cyclopropyl-6-tosyl-5,6,11,11a-tetrahydro-3*H*-indolizino[6,7-*b*]indole-11a-carboxylate (**7{2}**). Followed general procedure. The resulting residue was purified by flash chromatography (SiO<sub>2</sub>, hexane:EtOAc, 4:1–1:1) followed by prep TLC (EtOAc:hexane, 1:1) to afford **7{2}**- *syn* (17.2 mg, 0.037 mmol, 17%) as a yellow/tan amorphous oil/foam. *R*<sub>f</sub> 0.5 (hexane:EtOAc, 1:1); <sup>1</sup>H NMR (400 MHz, CDCl<sub>3</sub>) δ 8.16 (d, *J* = 8.4 Hz, 1 H), 7.65 (d, *J* = 8.4 Hz, 1 H), 7.42 (d, *J* = 7.6 Hz, 1 H), 7.33–7.28 (m, 2 H), 7.18 (d, *J* = 8.0 Hz, 2 H), 5.68 (s, 2 H), 4.48 (d, *J* = 7.2 Hz, 1 H), 3.96 (A of an ABq, *J* = 14.0 Hz, 1 H), 3.82–3.81 (m, 4 H), 3.49 (A of an ABq, *J* = 16.8 Hz, 1 H), 3.10 (B of an ABq, *J* = 14.0 Hz, 1 H), 2.99 (B of an ABq, *J* = 16.8 Hz, 1 H), 2.34 (s, 3 H), 1.31–0.88 (m, 5 H), 0.59–0.54 (m, 3 H), 0.40–0.38 (m, 1 H);

$^{13}\text{C}$  NMR (100 MHz,  $\text{CDCl}_3$ )  $\delta$  175.7, 144.8, 136.5, 136.4, 136.1, 133.6, 129.7, 127.7, 126.4, 124.5, 123.6, 118.2, 117.6, 115.0, 71.7, 61.1, 59.3, 52.9, 27.6, 21.5, 16.4, 4.0, 3.7; IR (neat): 1724, 1448, 1366, 1213, 1167, 1146, 1088, 1053, 1023, 744, 704, 665  $\text{cm}^{-1}$ ; HRMS (TOF- $\text{ES}^+$ ) ( $m/z$ ):  $[\text{M} + \text{H}]^+$  calcd for  $\text{C}_{26}\text{H}_{27}\text{N}_2\text{O}_4\text{S}$ , 463.1692; found, 463.1699.

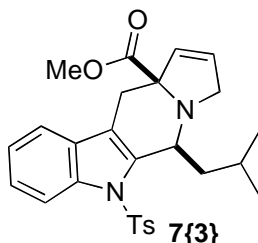

( $\pm$ )-Methyl 5-isobutyl-6-tosyl-5,6,11,11a-tetrahydro-3*H*-indolizino[6,7-*b*]indole-11a-carboxylate (**7{3}**). Followed general procedure. The resulting residue was purified by flash chromatography ( $\text{SiO}_2$ , hexane:EtOAc, 4:1–1:1) followed by prep. TLC (EtOAc:hexane, 1:1) to afford **7{3}**-*syn* (25 mg, 0.053 mmol, 23%) as a yellow/tan amorphous oil/foam.  $R_f$  0.33 (hexane:EtOAc, 4:1);  $^1\text{H}$  NMR (400 MHz,  $\text{CDCl}_3$ )  $\delta$  8.18 (d,  $J$  = 8.0 Hz, 1 H), 7.64 (d,  $J$  = 8.4 Hz, 2 H), 7.40–7.34 (m, 1 H), 7.30 (td,  $J$  = 1.4, 7.7 Hz, 1 H), 7.27–7.21 (m, 1 H), 7.19 (d,  $J$  = 8.4 Hz, 2 H), 5.79–5.76 (m, 1 H), 5.75–5.63 (m, 1 H), 4.62 (dd,  $J$  = 10.8, 3.5 Hz, 1 H), 4.04 (A of an ABq,  $J$  = 13.6 Hz, 1 H), 3.79 (s, 3 H), 3.50 (A of an ABq,  $J$  = 16.4 Hz, 1 H), 3.32 (B of an ABq,  $J$  = 14.0 Hz, 1 H), 2.83 (B of an ABq,  $J$  = 16.4 Hz, 1 H), 2.35 (s, 3 H), 2.21–2.09 (m, 1 H), 1.57–1.51 (m, 2 H), 1.13 (d,  $J$  = 6.8 Hz, 3 H), 0.99 (d,  $J$  = 6.8 Hz, 3 H);  $^{13}\text{C}$  NMR (100 MHz,  $\text{CDCl}_3$ )  $\delta$  175.5, 144.7, 138.2, 136.7, 135.9, 133.7, 129.9, 129.7, 127.6, 126.3, 124.3, 123.5, 118.1, 116.4, 114.9, 70.4, 61.9, 55.0, 52.7, 43.9, 26.7, 24.8, 23.7, 21.5, 20.9; IR (neat): 1726, 1450, 1364, 1213, 1169, 1148, 1088, 745, 665  $\text{cm}^{-1}$ ; HRMS (TOF- $\text{ES}^+$ ) ( $m/z$ ):  $[\text{M} + \text{H}]^+$  calcd for  $\text{C}_{27}\text{H}_{31}\text{N}_2\text{O}_4\text{S}$ , 479.2005; found, 479.2004.

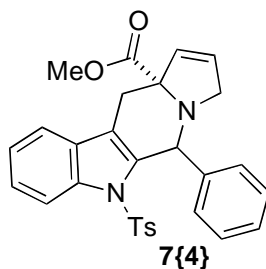

(±)-Methyl 5-phenyl-6-tosyl-5,6,11,11a-tetrahydro-3H-indolizino[6,7-b]indole-11a-carboxylate (**7{4}**). Followed general procedure. The resulting residue was purified by chromatography (SiO<sub>2</sub>, ISCO-Rf, 10–30% EtOAc:hex) to afford **7{4}**-*syn* (33 mg, 28%) and **7{4}**-*anti* (13 mg, 11%) both as yellow amorphous foams.

**7{4}**-*syn*: *R*<sub>f</sub> 0.31 (hexane:EtOAc, 4:1); mp 186–188 °C (decomp); IR (neat): 1737, 1450, 1370, 1185, 1172, 1120, 744, 701, 662 cm<sup>-1</sup>; <sup>1</sup>H NMR (400 MHz, CDCl<sub>3</sub>) δ 7.98–7.96 (m, 1 H), 7.48–7.45 (m, 1 H), 7.39 (d, *J* = 8.4 Hz, 2 H), 7.29–7.26 (m, 7 H), 7.06 (d, *J* = 8.0 Hz, 2 H), 6.10 (d, *J* = 6.0 Hz, 1 H), 5.95–5.94 (m, 1 H), 5.90 (s, 1 H), 3.84 (A of an ABq, *J* = 13.2 Hz, 1 H), 3.61 (A of an ABdq, *J* = 15.2, 2.0 Hz, 1 H), 3.57 (s, 3 H), 3.29 (B of an ABq, *J* = 13.2 Hz, 1 H), 2.99 (B of an ABdq, *J* = 14.8, 2.4 Hz, 1 H), 2.29 (s, 3 H); <sup>13</sup>C NMR (100 MHz, CDCl<sub>3</sub>) δ 174.3, 144.0, 141.9, 137.9, 137.7, 134.9, 132.7, 130.3, 129.9, 129.4, 129.2, 127.9, 127.3, 126.8, 124.7, 123.6, 120.3, 118.6, 115.3, 73.0, 60.5, 54.7, 51.7, 30.7, 21.5; HRMS (TOF-ES<sup>+</sup>) (*m/z*): [M + H]<sup>+</sup> calcd for C<sub>29</sub>H<sub>27</sub>N<sub>2</sub>O<sub>4</sub>S, 499.1692; found, 499.1688.

**7{4}**-*anti*: *R*<sub>f</sub> 0.17 (hexane:EtOAc, 4:1); mp 166–168 °C (decomp); IR (neat): 1724, 1450, 1372, 1210, 1169, 1150, 1120, 1088, 1059, 977, 745, 703, 667 cm<sup>-1</sup>; <sup>1</sup>H NMR (400 MHz, CDCl<sub>3</sub>) δ 8.21 (d, *J* = 8.0 Hz, 1 H), 7.52 (d, *J* = 7.2 Hz, 1 H), 7.41–7.37 (m, 3 H), 7.37–7.30 (m, 1 H), 7.20–7.17 (m, 3 H), 7.06–7.01 (m, 4 H), 5.99 (s, 1 H), 5.92 (dt, *J* = 6.0, 1.6 Hz, 1 H), 5.76–5.74 (m, 1 H), 4.31 (A of an ABq, *J* = 13.2 Hz, 1 H), 3.77 (B of an ABq, *J* = 13.6 Hz, 1 H), 3.61 (A of an ABq, *J* = 16.8 Hz, 1 H), 3.12 (s, 3 H), 2.91 (B of an ABq, *J* = 16.8 Hz, 1 H), 2.31 (s, 3 H); <sup>13</sup>C NMR (100 MHz, CDCl<sub>3</sub>) δ 174.7, 144.5, 139.6, 136.4, 135.6, 134.1, 133.9, 129.4, 129.3, 128.5, 128.2, 127.9, 127.1, 126.6, 124.7, 123.4, 118.6, 118.2, 114.6, 69.7, 60.3, 58.9, 52.2, 27.2, 21.5; HRMS (TOF-ES<sup>+</sup>) (*m/z*): [M + H]<sup>+</sup> calcd for C<sub>29</sub>H<sub>27</sub>N<sub>2</sub>O<sub>4</sub>S, 499.1692; found, 499.1693.

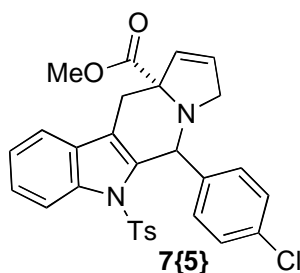

**(±)-Methyl 5-(4-chlorophenyl)-6-tosyl-5,6,11,11a-tetrahydro-3*H*-indolizino[6,7-*b*]indole-11a-carboxylate (7{5}).** Followed general procedure. The resulting residue was purified by chromatography (SiO<sub>2</sub>, ISCO-Rf, 10–30%, hexane:EtOAc) followed by preparative TLC (EtOAc:hexane, 1:1) to afford **7{5}-syn** (21 mg, 17%) and **7{5}-anti** (42 mg, 34%) both as yellowish foams.

**7{5}-syn:** *R*<sub>f</sub> 0.36 (hexane:EtOAc, 4:1); mp 197–199 °C (decomp); IR (neat): 1728, 1448, 1368, 1211, 1169, 1118, 1085, 1014, 971, 813, 742, 667 cm<sup>-1</sup>; <sup>1</sup>H NMR (400 MHz, CDCl<sub>3</sub>) δ 8.00 (d, *J* = 7.6 Hz, 1 H), 7.48–7.46 (m, 1 H), 7.39 (d, *J* = 8.0 Hz, 2 H), 7.29 (d, *J* = 1.2 Hz, 3 H), 7.19 (br s, 3 H), 7.07 (d, *J* = 8.0 Hz, 2 H), 6.10 (d, *J* = 6.0 Hz, 1 H), 5.94 (d, *J* = 6.0 Hz, 1 H), 5.88 (s, 1 H), 3.80 (A of an ABq, *J* = 13.2 Hz, 1 H), 3.64–3.62 (m, 1 H), 3.57 (s, 3 H), 3.27 (B of an ABq, *J* = 13.2 Hz, 1 H), 2.97 (B of an ABdq, *J* = 16.0, 2.0 Hz, 1 H), 2.31 (s, 3 H); <sup>13</sup>C NMR (100 MHz, CDCl<sub>3</sub>) δ 174.1, 144.2, 140.3, 137.8, 137.4, 134.9, 133.0, 132.6, 131.5, 130.8, 130.4, 130.3, 129.7, 129.2, 128.0, 126.5, 124.9, 123.7, 120.3, 118.7, 115.4, 73.0, 59.8, 54.6, 51.8, 30.6, 21.5; HRMS (TOF-ES<sup>+</sup>) (*m/z*): [M + H]<sup>+</sup> calcd for C<sub>29</sub>H<sub>26</sub>N<sub>2</sub>O<sub>4</sub>SCl, 533.1302; found, 533.1292.

**7{5}-anti:** *R*<sub>f</sub> 0.24 (hexane:EtOAc, 4:1); mp 125–127 °C (decomp); IR (neat): 1722, 1362, 1208, 1169, 1150, 1087, 1014, 809, 745, 662 cm<sup>-1</sup>; <sup>1</sup>H NMR (400 MHz, CDCl<sub>3</sub>) δ 8.24 (d, *J* = 8.4 Hz, 1 H), 7.53 (d, *J* = 7.2 Hz, 1 H), 7.52–7.39 (m, 3 H), 7.37–7.29 (m, 1 H), 7.11–7.09 (m, 2 H), 7.05 (d, *J* = 8.0 Hz, 2 H), 6.93 (d, *J* = 8.4 Hz, 2 H), 5.94–5.92 (m, 2 H), 5.74 (dt, *J* = 6.0, 1.9 Hz, 1 H), 4.30 (A of an ABtq, *J* = 13.6, 2.0 Hz, 1 H), 3.78 (B of an ABtq, *J* = 13.6, 2.0 Hz, 1 H), 3.59 (A of an ABq, *J* = 16.4 Hz, 1 H), 3.16 (s, 3 H), 2.88 (B of an ABq, *J* = 16.8 Hz, 1 H), 2.34 (s, 3 H); <sup>13</sup>C NMR (100 MHz, CDCl<sub>3</sub>) δ 174.5, 144.7, 138.3, 136.6, 135.7, 133.8, 133.4, 132.8, 129.8, 129.5, 129.2, 128.4, 128.3, 127.9, 126.3, 124.9, 123.5, 118.7, 118.3, 114.6, 69.5, 60.1, 58.1, 52.1, 27.1, 21.5; HRMS (TOF-ES<sup>+</sup>) (*m/z*): [M + H]<sup>+</sup> calcd for C<sub>29</sub>H<sub>26</sub>N<sub>2</sub>O<sub>4</sub>SCl, 533.1302; found, 533.1288.

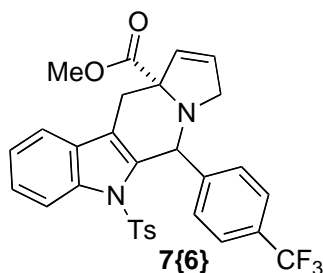

(±)-Methyl 6-tosyl-5-(4-(trifluoromethyl)phenyl)-5,6,11,11a-tetrahydro-3*H*-indolizino[6,7-*b*]indole-11a-carboxylate (**7{6}**). Followed general procedure. The resulting residue was purified by chromatography (SiO<sub>2</sub>, ISCO-Rf, 10–20% hexane:EtOAc) to afford **7{6}**-*syn* followed by preparative TLC (EtOAc:hexane, 1:1) (12 mg, 10%) and **7{6}**-*anti* (43.5 mg, 35%) both as yellowish solids.

**7{6}**-*syn*: *R*<sub>f</sub> 0.28 (hexane:EtOAc, 4:1); mp 191–192 °C (decomp); IR (neat): 1731, 1374, 1323, 1170, 1116, 1066, 1018, 829, 744, 665 cm<sup>-1</sup>; <sup>1</sup>H NMR (400 MHz, CDCl<sub>3</sub>) δ 8.02–7.99 (m, 1 H), 7.49–7.48 (m, 3 H), 7.39 (d, *J* = 8.4 Hz, 3 H), 7.33–7.29 (m, 3 H), 7.06 (d, *J* = 8.4 Hz, 2 H), 6.11–6.09 (m, 1 H), 5.98–5.97 (m, 2 H), 3.82 (A of an ABq, *J* = 13.2 Hz, 1 H), 3.62 (A of an ABdq, *J* = 15.2, 2.0 Hz, 1 H), 3.58 (s, 3 H), 3.23 (B of an ABq, *J* = 12.8 Hz, 1 H), 2.97 (B of an ABdq, *J* = 14.8, 2.4 Hz, 1 H), 2.30 (s, 3 H); <sup>13</sup>C NMR (100 MHz, CDCl<sub>3</sub>) δ 174.0, 145.8, 144.3, 137.8, 136.9, 134.9, 132.5, 130.3, 129.8, 129.7, 129.6, 129.2, 126.5, 125.1, 124.9, 124.8, 123.8, 120.5, 118.7, 115.4, 73.0, 60.1, 54.6, 51.8, 30.6, 21.4; HRMS (TOF-ES<sup>+</sup>) (*m/z*): [M + H]<sup>+</sup> calcd for C<sub>30</sub>H<sub>26</sub>N<sub>2</sub>O<sub>4</sub>SF<sub>3</sub>, 567.1565; found, 567.1563.

**7{6}**-*anti*: *R*<sub>f</sub> 0.21 (hexane:EtOAc, 4:1); mp 148–150 °C (decomp); IR (neat): 1720, 1321, 1210, 1163, 1124, 1090, 1064, 808, 745, 673, 654 cm<sup>-1</sup>; <sup>1</sup>H NMR (400 MHz, CDCl<sub>3</sub>) δ 8.26 (d, *J* = 8.4 Hz, 1 H), 7.55 (d, *J* = 7.2 Hz, 1 H), 7.45–7.39 (m, 1 H), 7.38–7.34 (m, 5 H), 7.10 (d, *J* = 8.4 Hz, 2 H), 7.02 (d, *J* = 8.4 Hz, 2 H), 5.99 (s, 1 H), 5.95 (dt, *J* = 2.0, 6.4 Hz, 1 H), 5.78 (dt, *J* = 6.0, 2.0 Hz, 1 H), 4.32 (A of an ABtq, *J* = 13.2, 1.6 Hz, 1 H), 3.85 (B of an ABdq, *J* = 13.2, 2.0 Hz, 1 H), 3.61 (A of an ABq, *J* = 16.8 Hz, 1 H), 3.05 (s, 3 H), 2.89 (B of an ABq, *J* = 16.8 Hz, 1 H), 2.31 (s, 3 H); <sup>13</sup>C NMR (100 MHz, CDCl<sub>3</sub>) δ 174.3, 144.7, 143.8, 136.8, 135.7, 133.7, 132.7, 129.5, 129.3, 129.1, 128.6, 128.2, 126.2, 125.1, 124.7, 124.6, 123.6, 118.7, 118.6,

114.7, 69.3, 60.2, 58.3, 52.0, 27.1, 21.4; HRMS (TOF-ES<sup>+</sup>) (*m/z*): [M + H]<sup>+</sup> calcd for C<sub>30</sub>H<sub>26</sub>N<sub>2</sub>O<sub>4</sub>SF<sub>3</sub>, 567.1565; found, 567.1558.

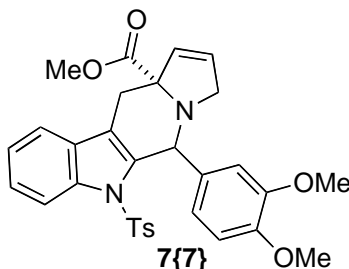

(±)-Methyl 5-(3,4-dimethoxyphenyl)-6-tosyl-5,6,11,11a-tetrahydro-3*H*-indolizino[6,7-*b*]indole-11a-carboxylate (**7{7}**). Followed general procedure. The resulting residue was purified by chromatography (SiO<sub>2</sub>, ISCO-Rf, 10–60% EtOAc:hexane) followed by preparative TLC (EtOAc:hexane, 1:1) to afford **7{7}**-*syn* (17 mg, 17%) and **7{7}**-*anti* (12 mg, 12%) both as yellowish residues.

**7{7}**-*syn*: *R*<sub>f</sub> 0.58 (hexane:EtOAc, 1:1); IR (neat): 1722, 1511, 1448, 1372, 1264, 1234, 1169, 1139, 1088, 1025, 978, 811, 745, 665 cm<sup>-1</sup>; <sup>1</sup>H NMR (400 MHz, CDCl<sub>3</sub>) δ 8.02–7.99 (m, 1 H), 7.48–7.46 (m, 1 H), 7.37 (d, *J* = 8.4 Hz, 2 H), 7.30–7.27 (m, 3 H), 7.04 (d, *J* = 8.4 Hz, 2 H), 6.86 (br s, 1 H), 6.72 (d, *J* = 8.0 Hz, 1 H), 6.10 (app d, *J* = 6.0 Hz, 1 H), 5.95–5.90 (m, 1 H), 5.83 (s, 1 H), 3.87 (s, 3 H), 3.79–3.77 (m, 4 H), 3.62 (d, *J* = 2.0 Hz, 1 H), 3.59 (s, 3 H), 3.30 (A of an ABq, *J* = 13.2 Hz, 1 H), 2.96 (B of an ABq, *J* = 14.8 Hz, 1 H) 2.30 (s, 3 H); <sup>13</sup>C NMR (100 MHz, CDCl<sub>3</sub>) δ 174.4, 148.2, 148.1, 143.9, 138.1, 137.7, 135.2, 134.3, 132.7, 130.3, 129.8, 129.0, 126.5, 124.7, 123.5, 119.7, 118.6, 115.3, 110.4, 73.0, 60.1, 55.8, 55.7, 54.8, 51.7, 30.7, 21.4; HRMS (TOF-ES<sup>+</sup>) (*m/z*): [M + H]<sup>+</sup> calcd for C<sub>31</sub>H<sub>31</sub>N<sub>2</sub>O<sub>6</sub>S, 559.1903; found, 559.1900.

**7{7}**-*anti*: *R*<sub>f</sub> 0.28 (hexane:EtOAc, 1:1); mp 148–150 °C (decomp); IR (neat): 1726, 1511, 1450, 1368, 1254, 1219, 1170, 1027, 809, 745, 660 cm<sup>-1</sup>; <sup>1</sup>H NMR (400 MHz, CDCl<sub>3</sub>) δ 8.23 (d, *J* = 8.4 Hz, 1 H), 7.52 (d, *J* = 7.2 Hz, 1 H), 7.42–7.29 (m, 4 H), 7.01 (d, *J* = 8.4 Hz, 2 H), 6.79–6.68 (m, 1 H), 6.58 (d, *J* = 8.4 Hz, 1 H), 6.36 (dd, *J* = 8.0, 1.8 Hz, 1 H), 5.92–5.90 (m, 2 H), 5.74–5.73 (m, 1 H), 4.24 (br s, 1 H), 3.85 (s, 3 H), 3.77 (s, 3 H), 3.76–3.70 (m, 1 H), 3.58 (A of an ABq, *J* = 16.4 Hz, 1 H), 3.21 (s, 3 H), 2.91 (B of an ABq, *J* = 16.4 Hz, 1 H), 2.31 (s, 3 H); <sup>13</sup>C NMR



(100 MHz, CDCl<sub>3</sub>)  $\delta$  148.6, 148.1, 144.5, 136.4, 135.7, 133.9, 129.3, 128.3, 126.6, 124.7, 123.4, 120.5, 118.6, 117.8, 114.6, 111.9, 110.2, 60.2, 58.7, 55.8, 55.6, 52.4, 27.2, 21.5; HRMS (TOF-ES<sup>+</sup>) ( $m/z$ ): [M + H]<sup>+</sup> calcd for C<sub>31</sub>H<sub>31</sub>N<sub>2</sub>O<sub>6</sub>S, 559.1903; found, 559.1900.

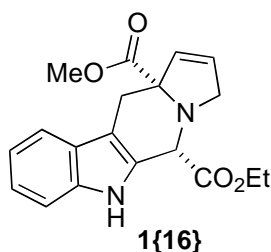

(±)-(5*S*,11*aS*)-5-Ethyl 11*a*-methyl 5,6,11,11*a*-tetrahydro-3*H*-indolizino[6,7-*b*]indole-5,11*a*-dicarboxylate (**1{16}**). To a solution of allene **6{16}** (235 mg, 0.693 mmol, dr = 1.4/1) in acetone (8 mL) in a septum-sealed reaction vial wrapped in aluminum foil, was added silver nitrate (23 mg, 0.14 mmol, 20 mol %, weighed and transferred under low light). The reaction mixture was degassed with bubbling argon (15 min) and protected from light for 18 h. The reaction mixture was diluted with CH<sub>2</sub>Cl<sub>2</sub> and washed with saturated NaHCO<sub>3</sub> (2 x). The combined organic layers were washed with brine, dried over MgSO<sub>4</sub>, filtered, and concentrated in vacuo. The resulting residue was purified using chromatography (SiO<sub>2</sub>, ISCO-Rf, 10–30% EtOAc/hexane) to afford **1{16}**-*syn* (18 mg, 8%) as a yellow foamy residue. *R*<sub>f</sub> 0.68 (hexane:EtOAc, 1:1); mp 180–182 °C; IR (neat): 3344, 1750, 1705, 1318, 1200, 1163, 1016, 749 cm<sup>-1</sup>; <sup>1</sup>H NMR (400 MHz, CDCl<sub>3</sub>)  $\delta$  8.32 (br s, 1 H), 7.55 (d, *J* = 8.0 Hz, 1 H), 7.35 (d, *J* = 8.0 Hz, 1 H), 7.19 (td, *J* = 7.6, 1.1 Hz, 1 H), 7.16–7.12 (m, 1 H), 6.22 (dt, *J* = 6.0, 1.2 Hz, 1 H), 6.01 (dt, *J* = 6.0, 1.6 Hz, 1 H), 5.38 (s, 1 H), 4.41–4.31 (m, 2 H), 4.24 (A of an ABq, *J* = 13.2 Hz, 1 H), 3.86 (B of an ABq, *J* = 12.8 Hz, 1 H), 3.63 (A of an ABdq, *J* = 14.4, 1.6 Hz, 1 H), 3.53 (s, 3 H), 2.98 (B of an ABdq, *J* = 14.8, 2.8 Hz, 1 H), 1.39 (t, *J* = 7.2 Hz, 3 H); <sup>13</sup>C NMR (100 MHz, CDCl<sub>3</sub>)  $\delta$  174.1, 170.4, 136.2, 132.1, 130.7, 129.0, 127.0, 122.1, 119.4, 118.4, 110.9, 109.0, 74.5, 61.7, 58.4, 54.8, 51.8, 28.8, 14.4; HRMS (TOF-ES<sup>+</sup>) ( $m/z$ ): [M + H]<sup>+</sup> calcd for C<sub>19</sub>H<sub>21</sub>N<sub>2</sub>O<sub>4</sub>, 341.1501; found, 341.1505.

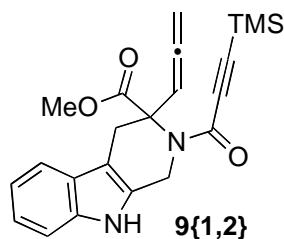

(±)-Methyl 3-(propa-1,2-dien-1-yl)-2-(3-(trimethylsilyl)propioloyl)-2,3,4,9-tetrahydro-1H-pyrido[3,4-*b*]indole-3-carboxylate (**9{1,2}**). To a solution of 3-(trimethylsilyl)propiolic acid (159 mg, 0.112), amino ester **6{1}** (200 mg, 0.745 mmol), and PyBroP (276 mg, 0.112 mmol) in CH<sub>2</sub>Cl<sub>2</sub> (2.0 mL) was added DIEA (519 μL, 2.98 mmol) at 0 °C. The ice bath was removed after 1–2 min and stirring continued at rt for 1 h. The mixture was poured into EtOAc (30 mL) and washed with 5% NaHSO<sub>4</sub>, saturated NaHCO<sub>3</sub>, brine, dried over MgSO<sub>4</sub>, filtered, and concentrated in vacuo. The resulting residue was purified by chromatography (SiO<sub>2</sub>, ISCO-Rf, 10–20% EtOAc:hexane) to afford amide **9{1,2}** (187 mg, 64%) as an amorphous residue. *R*<sub>f</sub> 0.7 (hexane:EtOAc, 1:1); IR (neat): 3388, 1735, 1618, 1392, 1249, 1200, 841, 738 cm<sup>-1</sup>; <sup>1</sup>H NMR (300 MHz, CDCl<sub>3</sub>) δ 8.08 (s, 1 H), 7.49 (d, *J* = 7.8 Hz, 1 H), 7.35 (d, *J* = 7.8 Hz, 1 H), 7.28–7.17 (m, 1 H), 7.16–7.08 (m, 1 H), 5.46 (t, *J* = 6.6 Hz, 1 H), 5.35 (d, *J* = 16.2 Hz, 1 H), 4.81–4.71 (m, 2 H), 4.54 (B of an ABdq, *J* = 6.6, 11.4 Hz, 1 H), 3.83 (s, 3 H), 3.46 (A of an ABq, *J* = 15.9 Hz, 1 H), 3.22 (B of an ABq, *J* = 15.6 Hz, 1 H), 0.27–0.22 (m, 9 H); <sup>13</sup>C NMR (100 MHz, CDCl<sub>3</sub>) δ 208.3, 171.0, 155.0, 136.3, 128.5, 127.0, 122.1, 119.7, 118.1, 110.9, 108.0, 99.0, 95.6, 90.6, 79.5, 62.6, 52.7, 44.2, 26.7, -0.7; HRMS (TOF-ES<sup>+</sup>) (*m/z*): [M + H]<sup>+</sup> calcd for C<sub>22</sub>H<sub>25</sub>N<sub>2</sub>O<sub>3</sub>Si, 393.1634; found, 393.1639.

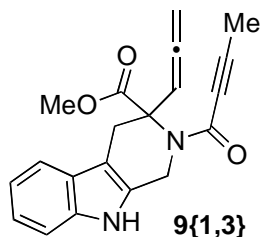

(±)-Methyl 2-(but-2-ynoyl)-3-(propa-1,2-dien-1-yl)-2,3,4,9-tetrahydro-1H-pyrido[3,4-*b*]indole-3-carboxylate (**9{1,3}**). To a solution of but-2-ynoic acid (70 mg, 0.84), amino ester **6{1}** (150 mg, 0.559 mmol), and PyBroP (207 mg, 0.839 mmol) in CH<sub>2</sub>Cl<sub>2</sub> (2.0 mL) was added DIEA

(389  $\mu$ L, 2.24 mmol) at 0 °C. The ice bath was removed after 1–2 min and stirring continued at rt for 1 h. The mixture was poured into EtOAc (30 mL) and washed with 5% NaHSO<sub>4</sub>, saturated NaHCO<sub>3</sub>, brine, dried over MgSO<sub>4</sub>, filtered, and concentrated in vacuo. The resulting residue was purified by chromatography (SiO<sub>2</sub>, ISCO-Rf, 20–80% EtOAc:hexane) to afford **9{1,3}** (140 mg, 75%) as an amorphous residue and bis-allene (19 mg, 10%). *R*<sub>f</sub> 0.24 (hexane:EtOAc, 1:1) (bis-allene, *R*<sub>f</sub> 0.16); IR (neat): 3387, 2233, 1731, 1612, 1390, 1372, 1251, 1183, 1042, 852, 740 cm<sup>-1</sup>; <sup>1</sup>H NMR (300 MHz, CDCl<sub>3</sub>)  $\delta$  8.37 (s, 1 H), 7.48 (d, *J* = 7.5 Hz, 1 H), 7.35 (d, *J* = 8.1 Hz, 1 H), 7.21–7.14 (m, 1 H), 7.13–7.09 (m, 1 H), 5.47 (t, *J* = 6.3 Hz, 1 H), 5.35 (d, *J* = 16.5 Hz, 1 H), 4.80–4.56 (m, 2 H), 4.52 (B of an ABdq, *J* = 11.7, 6.6 Hz, 1 H), 3.82 (s, 3 H), 3.46 (A of an ABq, *J* = 15.6 Hz, 1 H), 3.22 (B of an ABq, *J* = 15.3 Hz, 1 H), 1.99 (s, 3 H); <sup>13</sup>C NMR (100 MHz, CDCl<sub>3</sub>)  $\delta$  208.2, 171.3, 155.9, 136.4, 128.8, 126.9, 121.9, 119.5, 117.9, 111.0, 107.5, 90.8, 90.7, 79.4, 73.3, 62.6, 52.7, 44.2, 31.5, 26.9, 22.6, 14.1, 4.0; HRMS (TOF-ES<sup>+</sup>) (*m/z*): [M + H]<sup>+</sup> calcd for C<sub>20</sub>H<sub>19</sub>N<sub>2</sub>O<sub>3</sub>, 335.1396; found, 335.1403.

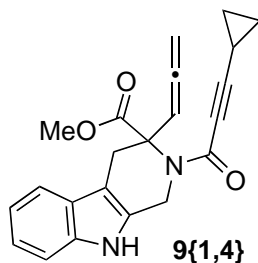

**(±)-Methyl 2-(3-cyclopropylpropioloyl)-3-(propa-1,2-dien-1-yl)-2,3,4,9-tetrahydro-1H-pyrido[3,4-*b*]indole-3-carboxylate (9{1,4})**. To a solution of 3-cyclopropylpropionic acid (0.123 g, 1.12 mmol), amino ester **6{1}** (0.200 g, 0.745 mmol), and PyBroP (0.276 g, 1.12 mmol) in CH<sub>2</sub>Cl<sub>2</sub> (4.0 mL) was added DIEA (519  $\mu$ L, 2.98 mmol) at 0 °C. The ice bath was removed after 1–2 min and stirring continued at rt for 3 h. The mixture was poured into EtOAc (30 mL) and washed with 5% NaHSO<sub>4</sub>, saturated NaHCO<sub>3</sub>, brine, dried over MgSO<sub>4</sub>, filtered, and concentrated in vacuo. The resulting residue was purified using chromatography (SiO<sub>2</sub>, ISCO-Rf, 20–50% EtOAc:hexane) to afford **9{1,4}** (191 mg, 71%) as an amorphous residue. *R*<sub>f</sub> 0.39 (hexane:EtOAc, 1:1); IR (neat): 3373, 2216, 1731, 1610, 1390, 1331, 1252, 1178, 1042, 854, 738 cm<sup>-1</sup>; <sup>1</sup>H NMR (300 MHz, CDCl<sub>3</sub>)  $\delta$  8.26 (s, 1 H), 7.48 (d, *J* = 7.5 Hz, 1 H), 7.34 (d, *J* = 7.8 Hz,

1 H), 7.19–7.14 (m, 1 H), 7.13–7.11 (m, 1 H), 5.44 (t,  $J = 6.6$  Hz, 1 H), 5.32 (d,  $J = 16.2$  Hz, 1 H), 4.80–4.68 (m, 2 H), 4.51 (B of an ABdq,  $J = 11.4, 6.6$  Hz, 1 H), 3.82 (s, 3 H), 3.43 (A of an ABq,  $J = 15.8$  Hz, 1 H), 3.23 (B of an ABq,  $J = 15.9$  Hz, 1 H), 1.38–1.28 (m, 2 H), 0.94–0.82 (m, 4 H);  $^{13}\text{C}$  NMR (100 MHz,  $\text{CDCl}_3$ )  $\delta$  208.2, 171.3, 155.9, 136.3, 128.8, 127.0, 121.9, 119.6, 118.0, 110.9, 107.7, 98.3, 90.8, 79.4, 69.2, 62.5, 52.7, 44.2, 31.6, 26.8, 22.6, 14.1, 9.2, -0.4; HRMS (TOF-ES $^+$ ) ( $m/z$ ):  $[\text{M} + \text{H}]^+$  calcd for  $\text{C}_{22}\text{H}_{21}\text{N}_2\text{O}_3$ , 361.1552; found, 361.1556.

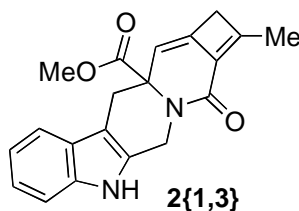

**(±)-Methyl 2-methyl-3-oxo-1,3,5,6,11,11a-hexahydrocyclobuta[*b*]indolo[2,3-*g*]quinolizine-11a-carboxylate (2{1,3}).** Method A: To an oven-dried microwave vial (2–5 mL) was added **9{1,3}** (55 mg, 0.16 mmol) in DMF (1 mL). The reaction mixture was subjected to microwave irradiation at 160 °C for 7 min. The crude product was purified by chromatography ( $\text{SiO}_2$ , ISCO-Rf, 20–50% EtOAc:hexane) to afford the **2{1,3}** (40 mg, 73%) as a off-white/clear amorphous residue.  $R_f$  0.39 (hexane:EtOAc, 1:1); mp 258–260 °C (decomp); IR (neat): 3338, 1731, 1664, 1621, 1381, 1329, 1256, 1195, 1165, 1046, 744  $\text{cm}^{-1}$ ;  $^1\text{H}$  NMR (400 MHz,  $d_6$ -DMSO)  $\delta$  10.92 (s, 1 H), 7.43 (d,  $J = 7.6$  Hz, 1 H), 7.32 (d,  $J = 8.0$  Hz, 1 H), 7.09–7.01 (m, 1 H), 7.01–6.97 (m, 1 H), 5.40 (s, 1 H), 5.32 (A of an ABq,  $J = 17.6$  Hz, 1 H), 4.22 (B of an ABq,  $J = 17.6$  Hz, 1 H), 3.73 (A of an ABq,  $J = 15.6$  Hz, 1 H), 3.54 (s, 3 H), 3.22 (br s., 2 H), 2.92 (B of an ABq,  $J = 15.6$  Hz, 1 H), 2.18 (s, 3 H);  $^{13}\text{C}$  NMR (100 MHz,  $d_6$ -DMSO)  $\delta$  171.3, 158.0, 154.0, 137.4, 136.8, 131.3, 130.2, 126.5, 121.6, 119.2, 118.2, 111.6, 107.0, 104.9, 70.7, 53.6, 32.9, 16.8; HRMS (TOF-ES $^+$ ) ( $m/z$ ):  $[\text{M} + \text{H}]^+$  calcd for  $\text{C}_{20}\text{H}_{19}\text{N}_2\text{O}_3$ , 335.1396; found, 335.1397.

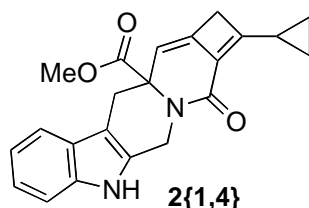

**(±)-Methyl 2-cyclopropyl-3-oxo-1,3,5,6,11,11a-hexahydrocyclobuta[*b*]indolo[2,3-*g*]quinolizine-11a-carboxylate (2{1,4}).** Method A: To an oven-dried microwave vial (2–5 mL) was added **9{1,4}** (50 mg, 0.14 mmol) in DMF (1 mL). The reaction mixture was subjected to microwave irradiation at 160 °C for 7 min. The crude product was purified by chromatography (SiO<sub>2</sub>, ISCO-Rf, 30–50% EtOAc:hexane) to afford the **2{1,4}** (28 mg, 57%) as an off-white solid. *R*<sub>f</sub> 0.47 (hexane:EtOAc, 1:1); mp 239–240 °C (decomp); IR (neat): 3271, 1728, 1648, 1612, 1333, 1202, 1169, 1042, 745, 660 cm<sup>-1</sup>; <sup>1</sup>H NMR (400 MHz, CDCl<sub>3</sub>) δ 9.09 (s, 1 H), 7.52 (d, *J* = 7.6 Hz, 1 H), 7.38 (d, *J* = 8.0 Hz, 1 H), 7.20–7.16 (m, 1 H), 7.15–7.11 (m, 1 H), 5.59 (A of an ABq, *J* = 17.2 Hz, 1 H), 5.28 (s, 1 H), 4.55 (B of an ABq, *J* = 17.2 Hz, 1 H), 3.82 (A of an ABq, *J* = 16.4 Hz, 1 H), 3.59 (ovlp B of an ABq, *J* = 16.3 Hz, 1 H), 3.63 (ovlp s, 3 H), 3.11–3.05 (m, 2 H), 2.09–1.99 (m, 1 H), 1.18–1.12 (m, 4 H); <sup>13</sup>C NMR (100 MHz, CDCl<sub>3</sub>) δ 171.3, 160.4, 158.5, 136.7, 136.4, 129.6, 128.2, 126.4, 121.6, 119.2, 117.9, 111.0, 105.5, 105.5, 70.8, 53.0, 39.7, 37.1, 33.0, 12.9, 10.1, 10.0; HRMS (TOF-ES<sup>+</sup>) (*m/z*): [M + H]<sup>+</sup> calcd for C<sub>22</sub>H<sub>21</sub>N<sub>2</sub>O<sub>3</sub>, 361.1552; found, 361.1544.

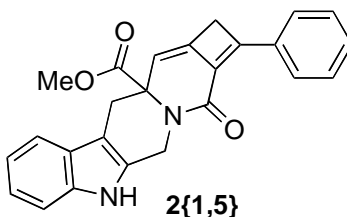

**(±)-Methyl 3-oxo-2-phenyl-1,3,5,6,11,11a-hexahydrocyclobuta[*b*]indolo[2,3-*g*]quinolizine-11a-carboxylate (2{1,5}).**

Method A: To an oven-dried microwave vial (2–5 mL) was added **9{1,5}** (76 mg, 0.19 mmol) in DMF (1 mL). The reaction mixture was subjected to microwave irradiation at 160 °C for 7 min. The crude product was purified by chromatography (SiO<sub>2</sub>, ISCO-Rf, DCM:acetone, 39:1) to afford **2{1,5}** as an off-white solid.

Method B: To a solution of 3-phenylpropionic acid (73.5 mg, 0.503 mmol), amino ester **6{1}** (90 mg, 0.335 mmol), and PyBroP (124 mg, 0.503 mmol) in CH<sub>2</sub>Cl<sub>2</sub> (1.0 mL) was added DIEA (234  $\mu$ L, 1.34 mmol) under stirring at 0 °C. The ice bath was removed after 1–2 min and stirring continued at rt for 1 h. The mixture was poured into EtOAc (15 mL) and washed with 5% NaHSO<sub>4</sub>, saturated NaHCO<sub>3</sub> and brine, then dried over MgSO<sub>4</sub>, filtered, and concentrated in vacuo. The resulting residue was filtered through a short plug of silica (eluted with EtOAc:hexane, 1:1) to isolate a mixture of allene-yne **9{1,5}** and cyclobutene **2{1,5}** (91 mg combined). The mixture was resuspended in CH<sub>2</sub>Cl<sub>2</sub> (4 mL) and placed in front of two 6 W ( $\lambda$  = 254 nm) lamps for 24 h without stirring at rt. The reaction mixture was concentrated and purified using flash chromatography (SiO<sub>2</sub>, CH<sub>2</sub>Cl<sub>2</sub>:acetone, 39:1) to afford the cyclobutene **2{1,5}** (53.3 mg, 40%) as a white solid. *R*<sub>f</sub> 0.28 (CH<sub>2</sub>Cl<sub>2</sub>:acetone, 39:1); mp 291–293 °C (decomp); IR (neat): 3237, 1735, 1646, 1605, 1333, 1264, 1239, 1197, 1157, 1308, 757, 734. 686 cm<sup>-1</sup>; <sup>1</sup>H NMR (400 MHz, *d*<sub>6</sub>-DMSO)  $\delta$  10.99 (s, 1 H), 8.06 (d, *J* = 6.8 Hz, 2 H), 7.53–7.45 (m, 4 H), 7.33 (d, *J* = 8.0 Hz, 1 H), 7.09 (t, *J* = 7.2 Hz, 1 H), 7.03–6.99 (m, 1 H), 5.68 (s, 1 H), 5.43 (A of an ABq, *J* = 18.0 Hz, 1 H), 4.35 (B of an ABq, *J* = 18.0 Hz, 1 H), 3.79 (A of an ABq, *J* = 15.6 Hz, 1 H), 3.60 (d, *J* = 4.0 Hz, 2 H), 3.56 (s, 3 H), 3.00 (B of an ABq, *J* = 15.2 Hz, 1 H); <sup>13</sup>C NMR (100 MHz, *d*<sub>6</sub>-DMSO)  $\delta$  171.1, 158.1, 149.9, 137.2, 136.8, 132.7, 131.1, 130.1, 129.2, 129.0, 128.6, 126.5, 121.6, 119.2, 118.2, 111.6, 110.0, 104.8, 71.2, 53.7, 39.9, 36.9, 32.8; HRMS (TOF-ES<sup>+</sup>) (*m/z*): [M + H]<sup>+</sup> calcd for C<sub>25</sub>H<sub>21</sub>N<sub>2</sub>O<sub>3</sub>, 397.1552; found, 397.1587.

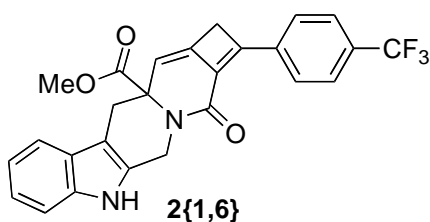

**(±)-Methyl 3-oxo-2-(4-(trifluoromethyl)phenyl)-1,3,5,6,11,11a-hexahydrocyclobuta[b]indolo [2,3-g]quinolizine-11a-carboxylate (2{1,6}).** Method B: To a solution of 3-(4-(trifluoromethyl)phenyl)propionic acid (108 mg, 0.503 mmol), amino ester **6{1}** (90 mg, 0.335 mmol), and PyBroP (124 mg, 0.503 mmol) in CH<sub>2</sub>Cl<sub>2</sub> (1.0 mL) was added DIEA (234  $\mu$ L, 1.34 mmol) at 0 °C. The ice bath was removed after 1–2 min and the reaction mixture was stirred at rt for 1 h. The mixture was poured into EtOAc (15 mL) and washed with 5% NaHSO<sub>4</sub>,

saturated NaHCO<sub>3</sub>, and brine, then dried over MgSO<sub>4</sub>, filtered, and concentrated in vacuo. The resulting residue was filtered through a short plug of silica (eluted with EtOAc:hexane, 1:1) to isolate a mixture of allene-yne **9{1,6}** and cyclobutene **2{1,6}** (105 mg combined). The mixture was resuspended in CH<sub>2</sub>Cl<sub>2</sub> (4 mL) and placed in front of two 6 W ( $\lambda$  = 254 nm) lamps for 24 h without stirring at rt. The reaction was concentrated and purified using flash chromatography (SiO<sub>2</sub>, CH<sub>2</sub>Cl<sub>2</sub>:acetone, 39:1) to afford the cyclobutene **2{1,6}** (64.4 mg, 41%) as a yellow solid. *R*<sub>f</sub> 0.43 (CH<sub>2</sub>Cl<sub>2</sub>:acetone, 39:1); mp 284–286 °C (decomp); IR (neat): 3284, 1735, 1646, 1605, 1320, 1200, 1163, 1122, 1113, 1064, 829, 740 cm<sup>-1</sup>; <sup>1</sup>H NMR (400 MHz, *d*<sub>6</sub>-DMSO)  $\delta$  11.00 (s, 1 H), 8.23 (d, *J* = 8.0 Hz, 2 H), 7.87 (d, *J* = 8.0 Hz, 2 H), 7.46 (d, *J* = 8.0 Hz, 1 H), 7.33 (d, *J* = 8.0 Hz, 1 H), 7.11–7.07 (m, 1 H), 7.03–6.99 (m, 1 H), 5.80 (s, 1 H), 5.45 (A of an ABq, *J* = 18.0 Hz, 1 H), 4.36 (B of an ABq, *J* = 17.6 Hz, 1 H), 3.79 (A of an ABq, *J* = 15.2 Hz, 1 H), 3.67 (d, *J* = 2.4 Hz, 2 H), 3.57 (s, 3 H), 3.02 (B of an ABq, *J* = 15.6 Hz, 1 H); <sup>13</sup>C NMR (100 MHz, *d*<sub>6</sub>-DMSO)  $\delta$  170.8, 157.8, 147.9, 140.0, 136.8, 136.2, 130.9, 130.0, 129.5, 126.4, 126.2, 126.1, 121.7, 119.2, 118.2, 111.8, 111.7, 104.8, 71.4, 53.8, 37.0, 32.7; HRMS (TOF-ES<sup>+</sup>) (*m/z*): [M + H]<sup>+</sup> calcd for C<sub>26</sub>H<sub>20</sub>N<sub>2</sub>O<sub>3</sub>F<sub>3</sub>, 465.1426; found, 465.1436.

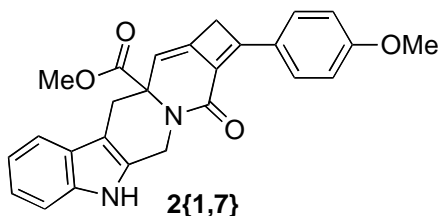

(±)-Methyl 2-(4-methoxyphenyl)-3-oxo-1,3,5,6,11,11a-hexahydrocyclobuta[*b*]indolo[2,3-*g*]quinolizine-11a-carboxylate (**2{1,7}**). Method B: To a solution of 3-(4-methoxyphenyl)propionic acid (89 mg, 0.503 mmol), amino ester **6{1}** (90 mg, 0.335 mmol), and PyBroP (124 mg, 0.503 mmol) in CH<sub>2</sub>Cl<sub>2</sub> (1.0 mL) was added DIEA (234  $\mu$ L, 1.34 mmol) at 0 °C. The ice bath was removed after 1–2 min and the reaction mixture was stirred at rt for 2 h. The mixture was poured into EtOAc (15 mL) and washed with 5% NaHSO<sub>4</sub>, saturated NaHCO<sub>3</sub> and brine, then dried over MgSO<sub>4</sub>, filtered, and concentrated in vacuo. The resulting residue was filtered through a short plug of silica (eluted with EtOAc:hexane, 1:1) to isolate a mixture of allene-yne **9{1,7}** and cyclobutene **2{1,7}** (69 mg combined). The mixture was resuspended in CH<sub>2</sub>Cl<sub>2</sub> (4 mL) and placed in front of two 6 W ( $\lambda$  = 254 nm) lamps for 24 h without stirring at rt.

The reaction was concentrated and purified using flash chromatography (SiO<sub>2</sub>, CH<sub>2</sub>Cl<sub>2</sub>:acetone, 39:1) to afford the cyclobutene **2{1,7}** (43.6 mg, 30%) as a white solid. *R*<sub>f</sub> 0.20 (CH<sub>2</sub>Cl<sub>2</sub>:acetone, 39:1); mp 296–298 °C (decomp); IR (neat): 3256, 1733, 1646, 1599, 1508, 1331, 1305, 1252, 1170, 1025, 829, 738 cm<sup>-1</sup>; <sup>1</sup>H NMR (400 MHz, *d*<sub>6</sub>-DMSO) δ 10.98 (s, 1 H), 8.01 (d, *J* = 8.8 Hz, 2 H), 7.45 (d, *J* = 7.6 Hz, 1 H), 7.32 (d, *J* = 8.0 Hz, 1 H), 7.10–7.06 (m, 3 H), 6.99–6.98 (m, 1 H), 5.57 (s, 1 H), 5.41 (A of an ABq, *J* = 17.6 Hz, 1 H), 4.32 (B of an ABq, *J* = 18.0 Hz, 1 H), 3.85 (s, 3 H), 3.78 (A of an ABq, *J* = 15.2 Hz, 1 H), 3.57–3.52 (m, 5 H), 2.99 (B of an ABq, *J* = 15.2 Hz, 1 H); <sup>13</sup>C NMR (100 MHz, *d*<sub>6</sub>-DMSO) δ 171.2, 161.7, 158.4, 150.0, 137.3, 136.8, 131.1, 130.2, 126.5, 126.0, 125.7, 121.6, 119.2, 118.2, 114.8, 111.6, 108.5, 104.9, 71.1, 55.9, 53.6, 36.8, 32.9; HRMS (TOF-ES<sup>+</sup>) (*m/z*): [M + H]<sup>+</sup> calcd for C<sub>26</sub>H<sub>23</sub>N<sub>2</sub>O<sub>4</sub>, 427.1658; found, 427.1620.

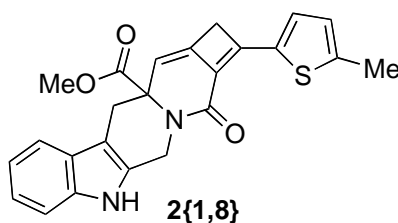

(±)-Methyl 2-(5-methylthiophen-2-yl)-3-oxo-1,3,5,6,11,11a-hexahydrocyclobuta[*b*]indolo[2,3-*g*]quinolizine-11a-carboxylate (**2{1,8}**). Method B: To a solution of 3-(5-methylthiophen-2-yl)propionic acid (83.6 mg, 0.503 mmol), amino ester **6{1}** (90 mg, 0.335 mmol), and PyBroP (124 mg, 0.503 mmol) in CH<sub>2</sub>Cl<sub>2</sub> (1.0 mL) was added DIEA (234 μL, 1.34 mmol) while stirring at 0 °C. The ice bath was removed after 1–2 min and the reaction mixture was stirred at rt for 3 h. The mixture was poured into EtOAc (15 mL) and washed with 5% NaHSO<sub>4</sub>, saturated NaHCO<sub>3</sub> and brine, then dried over MgSO<sub>4</sub>, filtered, and concentrated in vacuo. The resulting residue was filtered through a short plug of silica (eluted with EtOAc:hexane, 1:1) to isolate a mixture of allene-yne **9{1,8}** and cyclobutene **2{1,8}** (62 mg combined). The semipurified product was placed in front of two 6 W (λ = 254 nm) lamps for 24 h without stirring at rt. The reaction was concentrated and purified using flash chromatography (SiO<sub>2</sub>, CH<sub>2</sub>Cl<sub>2</sub>:acetone, 39:1) to afford the cyclobutene **2{1,8}** (45.6 mg, 0.109 mmol, 33%) as a yellow solid. *R*<sub>f</sub> 0.24 (CH<sub>2</sub>Cl<sub>2</sub>:acetone, 39:1); mp 297–298 °C (decomp); <sup>1</sup>H NMR (400 MHz, *d*<sub>6</sub>-DMSO) δ 10.97 (s, 1 H), 7.48–7.44 (m, 2 H), 7.31 (d, *J* = 8.0 Hz, 1 H), 7.06 (t, *J* = 7.2 Hz, 1 H), 7.02–6.94 (m, 1 H), 6.93 (d, *J* =



2.8 Hz, 1 H), 5.57 (s, 1 H), 5.38 (A of an ABq,  $J = 17.6$  Hz, 1 H), 4.28 (B of an ABq,  $J = 18.0$  Hz, 1 H), 3.74 (A of an ABq,  $J = 15.5$  Hz, 1 H), 3.58–3.56 (m, 5 H), 2.98 (B of an ABq,  $J = 15.6$  Hz, 1 H), 2.52 (s, 3 H);  $^{13}\text{C}$  NMR (100 MHz,  $d_6$ -DMSO)  $\delta$  171.1, 157.9, 147.2, 141.3, 137.3, 136.8, 133.9, 132.1, 130.2, 127.7, 126.5, 124.2, 121.6, 119.2, 118.2, 111.6, 109.1, 104.8, 71.3, 53.7, 38.0, 32.9, 15.9; IR (neat): 3247, 1731, 1642, 1599, 1331, 1264, 1195, 1159, 1040,  $734\text{ cm}^{-1}$ ; HRMS (TOF-ES $^{+}$ ) ( $m/z$ ):  $[\text{M} + \text{H}]^{+}$  calcd for  $\text{C}_{24}\text{H}_{21}\text{N}_2\text{O}_3\text{S}$ , 417.1271; found, 417.1273.

**(±)-Methyl 3-methyl-1-methylene-2,4-dioxo-1,2,4,6,7,12,12a,12b-octahydrocyclopenta[1,2]indolizino[6,7-*b*]indole-12a-carboxylate (3{1,3}).** To an oven dried 1 dram tall sealable vial was added  $\text{Mo}(\text{CO})_6$  (83 mg, 0.31 mmol). The vial was evacuated under vacuum and filled with argon (3 x). A solution of allene-amide **9{1,3}** (70 mg, 0.21 mmol) in dry toluene (4 mL) was added by syringe followed by the addition of dry DMSO (125  $\mu\text{L}$ , 1.77 mmol). The solution was placed in a preheated oil bath at  $95\text{ }^{\circ}\text{C}$  for 2 h. After completion the solution was passed through a pipette containing silica. The filtrate was concentrated and the crude material was purified by flash chromatography ( $\text{SiO}_2$ , hexane:EtOAc, 2:1) to afford **3{1,3}** (36.8 mg, 0.101 mmol, 48%) as a 1:1 mixture of two diastereomers as an amorphous residue.  $R_f$  0.11 (hexane:EtOAc, 2:1);  $^1\text{H}$  NMR (400 MHz,  $\text{CDCl}_3$ )  $\delta$  8.65 (s, 0.5 H), 8.52 (s, 0.5 H), 7.55 (d,  $J = 7.5$  Hz, 0.5 H), 7.42 (d,  $J = 7.6$  Hz, 0.5 H), 7.33 (d,  $J = 6.0$  Hz, 0.5 H), 7.31 (d,  $J = 8.0$  Hz, 0.5 H), 7.29–7.16 (m, 1.5 H), 7.13–7.11 (m, 0.5 H), 6.49 (d,  $J = 2.0$  Hz, 0.5 H), 6.36 (d,  $J = 2.0$  Hz, 0.5 H), 5.97 (d,  $J = 1.0$  Hz, 0.5 H), 5.76 (d,  $J = 1.2$  Hz, 0.5 H), 5.32 (dd,  $J = 16.6, 1.3$  Hz, 0.5 H), 5.01 (dd,  $J = 17.2, 1.4$  Hz, 0.5 H), 4.66 (d,  $J = 16.6$  Hz, 0.5 H), 4.38 (d,  $J = 17.3$  Hz, 0.5 H), 4.16 (d,  $J = 7.2$  Hz, 0.5 H), 4.00–3.98 (m, 1 H), 3.78 (s, 1.5 H), 3.44 (s, 1.5 H), 3.32 (d,  $J = 15.6$  Hz, 0.5 H), 3.09 (d,  $J = 15.1$  Hz, 0.5 H), 2.37 (d,  $J = 15.6$  Hz, 0.5 H), 2.19 (d,  $J = 3.2$  Hz, 1.5 H), 2.15 (d,  $J = 2.8$  Hz, 1.5 H);  $^{13}\text{C}$  NMR (100 MHz,  $\text{CDCl}_3$ )  $\delta$  196.0, 195.5, 171.7, 168.9, 165.6, 164.1, 154.9, 153.9, 143.0, 141.8, 140.4, 139.8, 136.7, 136.4, 128.9, 127.6, 126.5, 126.1, 122.3, 122.2, 121.1, 120.9, 119.8, 119.7, 118.0, 117.9, 111.1, 111.0, 105.9, 105.1, 69.2, 66.7, 60.4, 53.3, 53.0, 52.1, 48.3, 38.8, 38.0, 30.8, 25.0, 21.0, 14.1, 9.1, 9.0; IR (neat): 3332,

1733, 1698, 1387, 1370, 1331, 1232, 1198, 1042, 744  $\text{cm}^{-1}$ ; HRMS (TOF-ES<sup>+</sup>) ( $m/z$ ):  $[\text{M} + \text{H}]^+$  calcd for  $\text{C}_{21}\text{H}_{19}\text{N}_2\text{O}_4$ , 363.1345; found, 363.1341.

**(±)-Methyl 3-cyclopropyl-1-methylene-2,4-dioxo-1,2,4,6,7,12,12a,12b-octahydrocyclopenta[1,2]indolizino[6,7-*b*]indole-12a-carboxylate (3{1,4}).** To an oven-dried tall sealable vial was added  $\text{Mo}(\text{CO})_6$  (142 mg, 0.54 mmol). The vial was evacuated under vacuum and filled with Argon (3 x). A solution of allene-amide **9{1,4}** (130 mg, 0.361 mmol) in dry toluene (4 mL) was added by syringe followed by the addition of dry DMSO (218  $\mu\text{L}$ , 3.1 mmol). The solution was placed in a preheated oil bath at 95 °C for 2 h. After completion the solution was passed through a pipette containing silica. The filtrate was concentrated and the crude material was purified by flash chromatography ( $\text{SiO}_2$ , hexane:EtOAc, 2:1) to afford **3{1,4}** (63 mg, 0.162 mmol, 46%) as a 1:1 mixture of two diastereomers as an amorphous residue.  $R_f$  0.52 (hexane:EtOAc, 1:1);  $^1\text{H}$  NMR (400 MHz,  $\text{CDCl}_3$ )  $\delta$  8.89 (s, 0.5 H), 8.66 (s, 0.5 H), 7.55 (d,  $J = 7.5$  Hz, 0.5 H), 7.50 (d,  $J = 7.8$  Hz, 0.5 H), 7.42 (d,  $J = 8.0$  Hz, 0.5 H), 7.35–7.29 (m, 1 H), 7.22–7.11 (m, 1.5 H), 6.42 (d,  $J = 2.0$  Hz, 0.5 H), 6.30 (d,  $J = 2.0$  Hz, 0.5 H), 5.94 (d,  $J = 1.0$  Hz, 0.5 H), 5.73 (d,  $J = 1.6$  Hz, 0.5 H), 5.31 (dd,  $J = 13.2, 1.3$  Hz, 0.5 H), 5.01 (dd,  $J = 13.3, 1.4$  Hz, 0.5 H), 4.66 (d,  $J = 16.6$  Hz, 0.5 H), 4.40 (d,  $J = 17.3$  Hz, 0.5 H), 4.10 (d,  $J = 14.8$  Hz, 0.5 H), 3.94 (d,  $J = 7.2$  Hz, 1 H), 3.77 (s, 1.5 H), 3.46 (s, 1.5 H), 3.29 (d,  $J = 15.3$  Hz, 0.5 H), 3.07 (d,  $J = 14.8$  Hz, 0.5 H), 2.24 (d,  $J = 8.8$  Hz, 0.5 H), 1.62–1.60 (m, 1 H), 1.53–1.39 (m, 1 H), 1.15–1.08 (m, 1 H), 1.06–1.02 (m, 1 H), 1.01–0.99 (m, 1 H);  $^{13}\text{C}$  NMR (100 MHz,  $\text{CDCl}_3$ )  $\delta$  194.6, 194.4, 171.8, 169.0, 164.3, 151.3, 150.6, 148.7, 147.9, 140.4, 140.0, 136.9, 136.8, 136.4, 129.1, 127.8, 126.5, 126.1, 122.2, 122.1, 120.7, 119.7, 119.6, 118.0, 117.8, 111.1, 111.0, 105.7, 105.5, 105.1, 69.0, 66.7, 53.2, 52.9, 52.1, 48.1, 39.1, 38.1, 30.7, 25.0, 9.5, 9.2, 8.9, 8.5, 8.0, 7.7; IR (neat): 3353, 1735, 1694, 1661, 1353, 1331, 1200, 973, 952, 742  $\text{cm}^{-1}$ ; HRMS (TOF-ES<sup>+</sup>) ( $m/z$ ):  $[\text{M} + \text{H}]^+$  calcd for  $\text{C}_{23}\text{H}_{21}\text{N}_2\text{O}_4$ , 389.1501; found, 389.1518.

## References

- [S1] Painter, T. O.; Wang, L.; Majumder, S.; Xie, X.-Q.; Brummond, K. M. *ACS Comb. Sci.* **2011**, *13* 166–174.
- [S2] Ran, J.-Q.; Huang, N.; Xu, H.; Yang, L.-M.; Lv, M.; Zheng, Y.-T. *Bioorg. Med. Chem. Lett.* **2010**, *20*, 3534–3536.

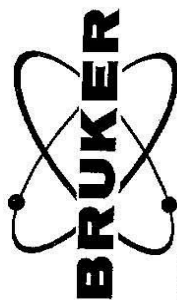

NAME JRG-329-22  
 EXPNO 2  
 PROCNO 1  
 Date 20110218  
 Time 12.49  
 INSTRUM spect  
 PROBHD 5 mm Multinucl  
 PULPROG zg  
 TD 32768  
 SOLVENT CDCl3  
 NS 16  
 DS 2  
 SWH 6172.839 Hz  
 FIDRES 0.188380 Hz  
 AQ 2.6542580 sec  
 RG 228.1  
 DW 81.000 usec  
 DE 6.00 usec  
 TE 298.2 K  
 D1 2.00000000 sec  
 TD0 1

CHANNEL f1  
 NUC1 1H  
 P1 5.00 usec  
 PL1 4.00 dB  
 SF01 300.1418531 MHz  
 SI 16384  
 SF 300.1400000 MHz  
 WDW EM  
 SSB 0  
 LB 0.10 Hz  
 GB 0  
 PC 1.00

7.601  
 7.572  
 7.553  
 7.540  
 7.435  
 7.407  
 7.339  
 7.333  
 7.278  
 7.250  
 7.242  
 7.235  
 7.220  
 7.147  
 7.142  
 7.130  
 7.118  
 6.037  
 6.017  
 5.992  
 5.987  
 5.980  
 5.973  
 5.966  
 5.960  
 5.040  
 4.148  
 4.101  
 3.870  
 3.820  
 3.784  
 3.778  
 3.772  
 3.470  
 2.823  
 2.818  
 2.774  
 2.769

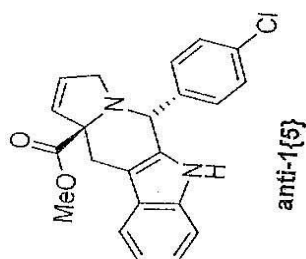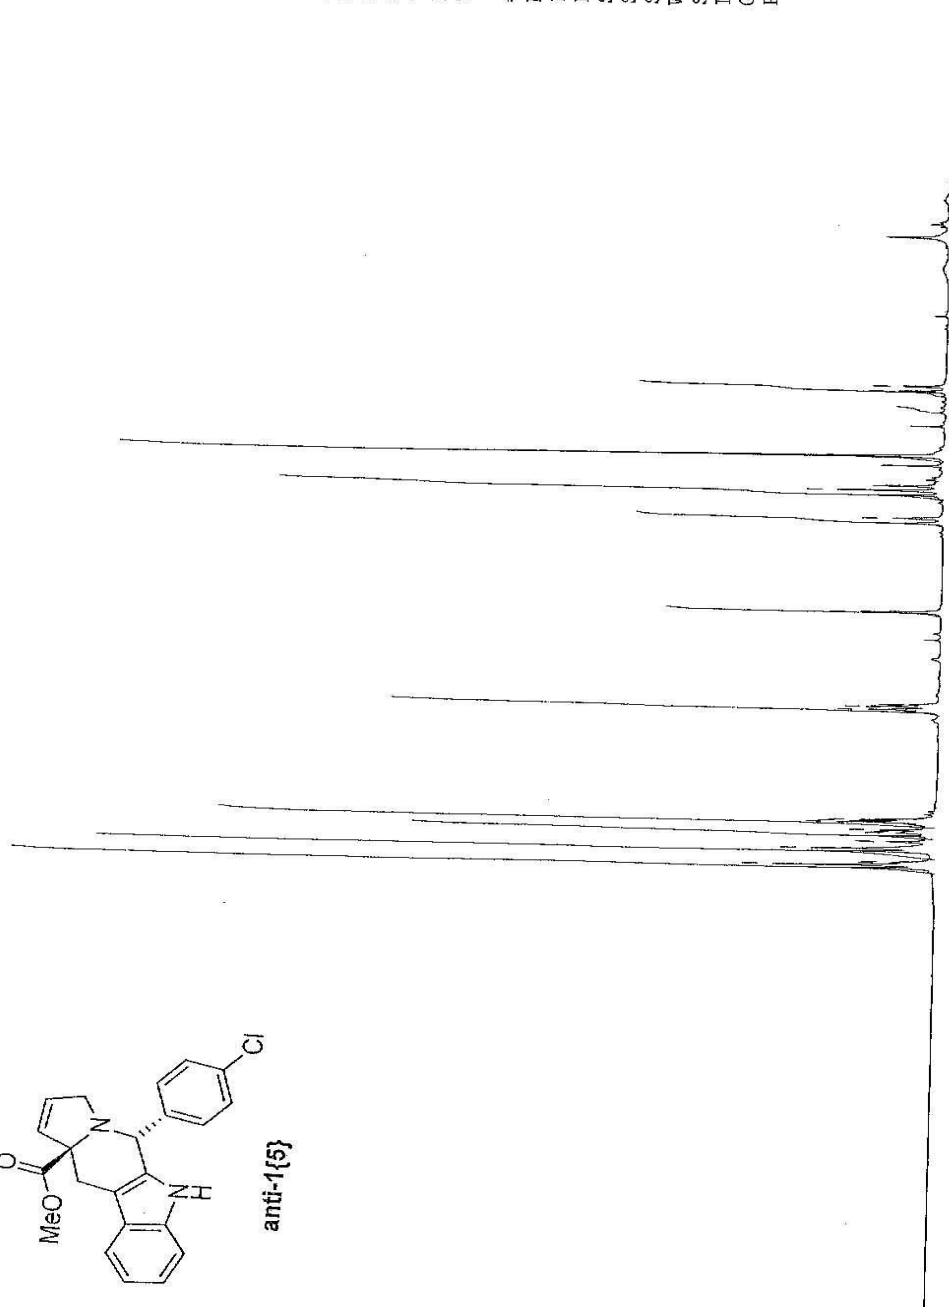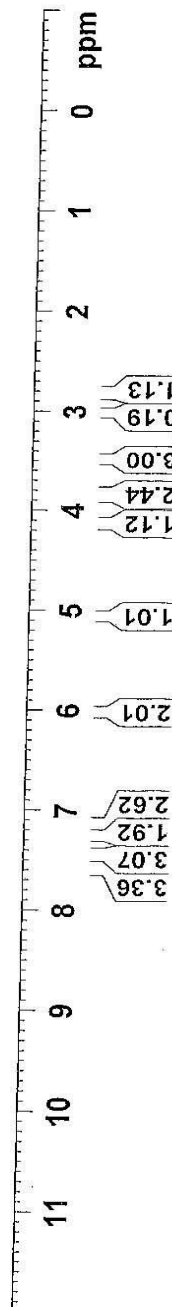

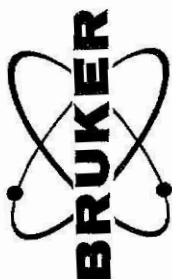

NAME JRG-329-22

EXPNO 3

PROCNO 1

Date\_ 20110218

Time\_ 12.55

INSTRUM spect

PROBHD 5 mm Multinucl

PULPROG zg

TD 32768

SOLVENT CDCl3

NS 16

DS 2

SWH 6172.839 Hz

FIDRES 0.188380 Hz

AQ 2.6542580 sec

RG 228.1

DW 81.000 usec

DE 6.00 usec

TE 298.2 K

D1 2.0000000 sec

TD0 1

CHANNEL f1

NUC1 1H

Pl 5.00 usec

PL1 4.00 dB

SFO1 300.1418531 MHz

SI 16384

SF 300.1400000 MHz

WDW EM

SSB 0

LB 0.10 Hz

GB 0

PC 1.00

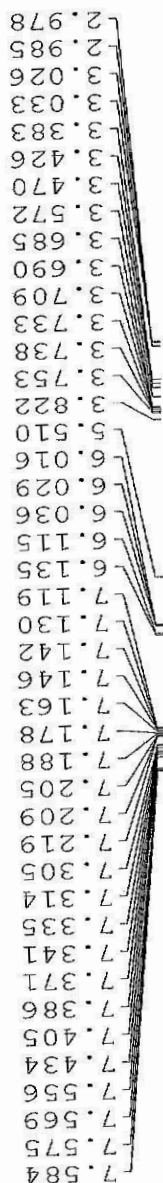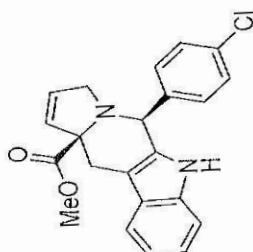

syn-1{5}

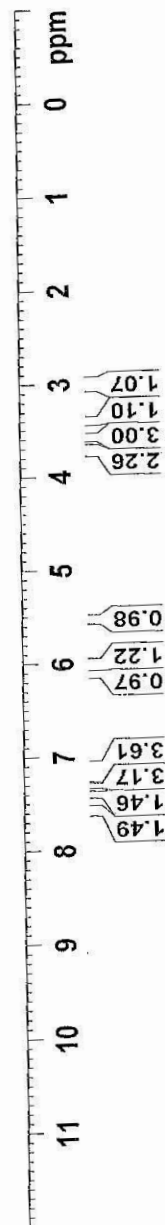

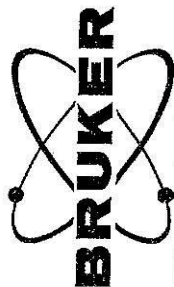

JRG-348-77bre

NAME  
EXPNO 1  
PROCNO 1  
Date\_ 20110728  
Time\_ 12.36  
INSTRUM spect  
PROBHD 5 mm PABBO BB-  
PULPROG zg30  
TD 65536  
SOLVENT CDCl3  
NS 4  
DS 2  
SWH 8223.685 Hz  
FIDRES 0.125483 Hz  
AQ 3.9846387 sec  
RG 90.5  
DW 60.800 usec  
DE 6.50 usec  
TE 295.4 K  
D1 2.00000000 sec  
TD0 1

===== CHANNEL f1 =====  
NUC1 1H  
P1 14.31 usec  
PL1 -1.00 dB  
PL1W 11.09959412 W  
SF01 400.2324716 MHz  
SI 32768  
SF 400.2300000 MHz  
WDW EM  
SSB 0  
LB 0.30 Hz  
GB 0  
PC 1.00

1.372  
1.390  
1.408  
1.969  
2.975  
3.005  
3.012  
3.531  
3.614  
3.618  
3.650  
3.654  
3.886  
4.233  
4.266  
4.311  
4.329  
4.383  
4.401  
4.410  
5.383  
6.008  
6.012  
6.017  
6.023  
6.027  
6.223  
6.226  
6.238  
6.241  
6.241  
7.140  
7.157  
7.160  
7.188  
7.190  
7.208  
7.210  
7.228  
7.291  
7.343  
7.363  
7.545  
7.565  
8.324

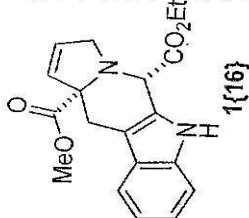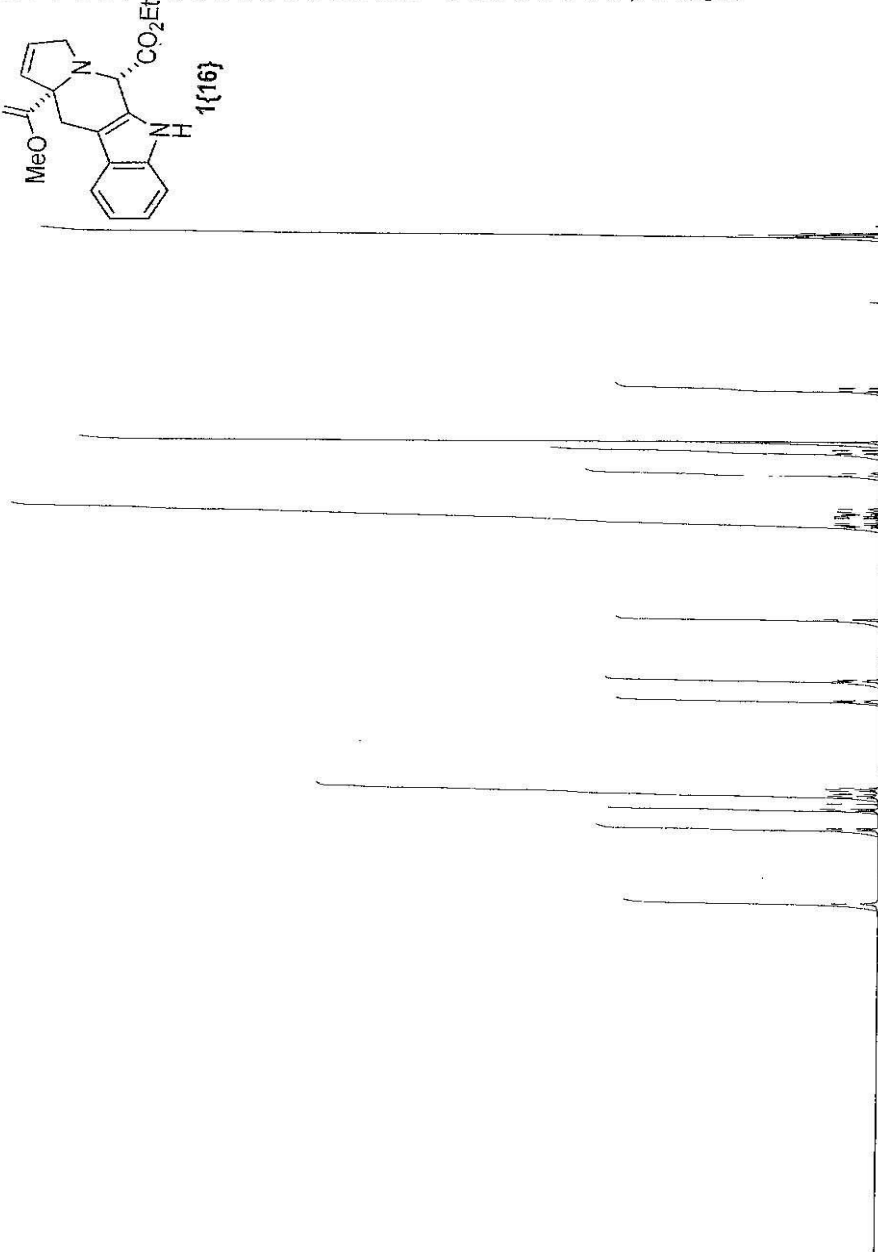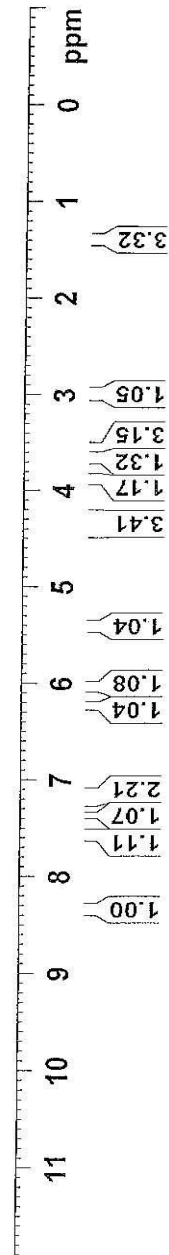

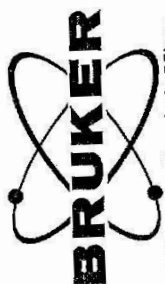

NAME JRG-348-77bre  
 EXPNO 2  
 PROCNO 1  
 Date 20110728  
 Time 12.46  
 INSTRUM spect  
 PROBD 5 mm PABBO BB-  
 PULPROG zgpg30  
 TD 65536  
 SOLVENT CDCl3  
 NS 75  
 DS 4  
 SWH 24038.461 Hz  
 FIDRES 0.366798 Hz  
 AQ 1.3631988 sec  
 RG 203  
 DW 20.800 usec  
 DE 6.50 usec  
 TE 295.8 K  
 D1 3.00000000 sec  
 D11 0.03000000 sec  
 TDO 1

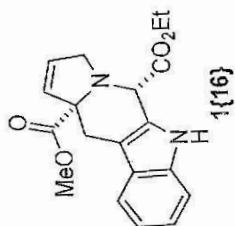

14.36

28.83

51.75

54.83

58.41

61.73

74.54

108.99

110.91

118.44

119.40

122.08

127.04

129.01

130.70

132.15

136.22

170.46

174.12

==== CHANNEL f1 =====  
 NUC1 13C  
 P1 10.00 usec  
 PL1 -1.59 dB  
 PL1W 51.07626343 W  
 SFO1 100.6479773 MHz

==== CHANNEL f2 =====  
 CPDPRG2 waltz16  
 NUC2 1H  
 PCPD2 75.00 usec  
 PL2 -1.00 dB  
 PL12 13.39 dB  
 PL13 20.00 dB  
 PL2W 11.09959412 W  
 PL12W 0.40393090 W  
 PL13W 0.08816721 W  
 SFO2 400.2316009 MHz  
 SI 32768  
 SF 100.6379214 MHz  
 WDW EM  
 SSB 0  
 LB 1.00 Hz  
 GB 0  
 PC 1.40

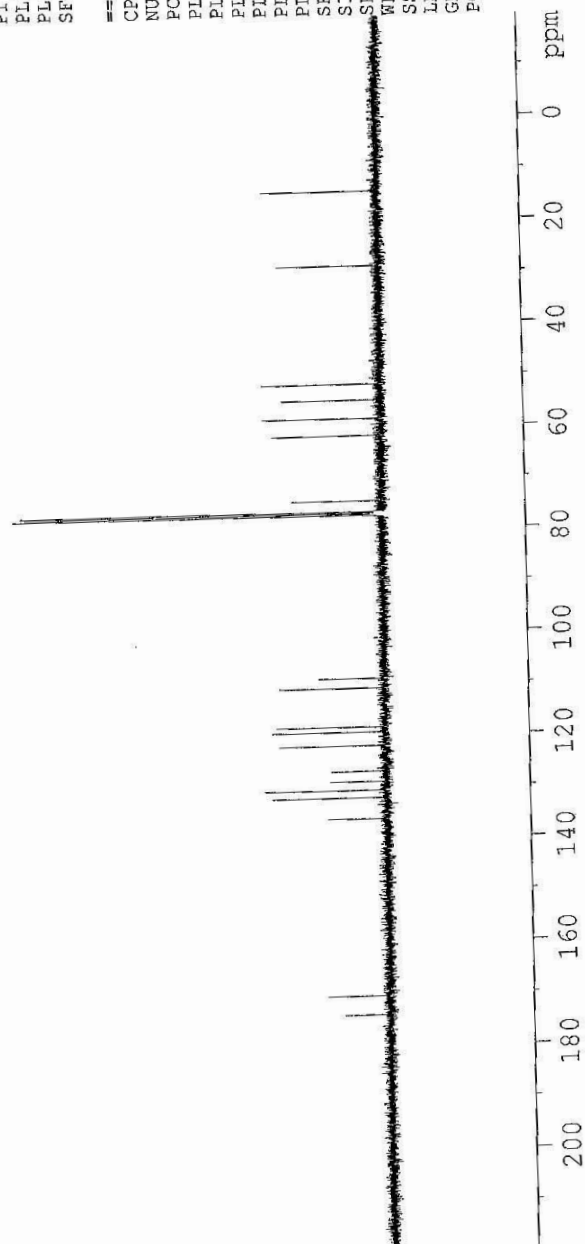

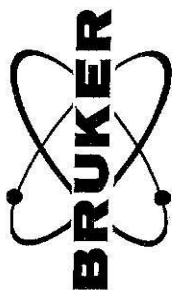

NAME JRG-348-35  
 EXPNO 1  
 PROCNO 1  
 Date\_ 20110629  
 Time\_ 9.18  
 INSTRUM spect  
 PROBD 5 mm PABBO BB-  
 PULPROG zg30  
 TD 65536  
 SOLVENT DMSO  
 NS 4  
 DS 2  
 SWH 8223.685 Hz  
 FIDRES 0.125483 Hz  
 AQC 3.9846387 sec  
 RG 144  
 DW 60.800 usec  
 DE 6.50 usec  
 TE 294.9 K  
 D1 2.0000000 sec  
 TD0 1

CHANNEL f1 =====  
 NUC1 1H  
 P1 14.31 usec  
 PL1 -1.00 dB  
 PL1W 11.09959412 W  
 SFO1 400.2324716 MHz  
 SI 32768  
 SF 400.2300000 MHz  
 WDW EM  
 SSB 0  
 LB 0.30 Hz  
 GB 0  
 PC 1.00

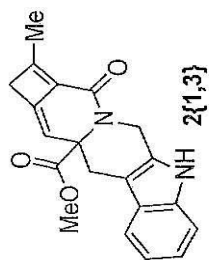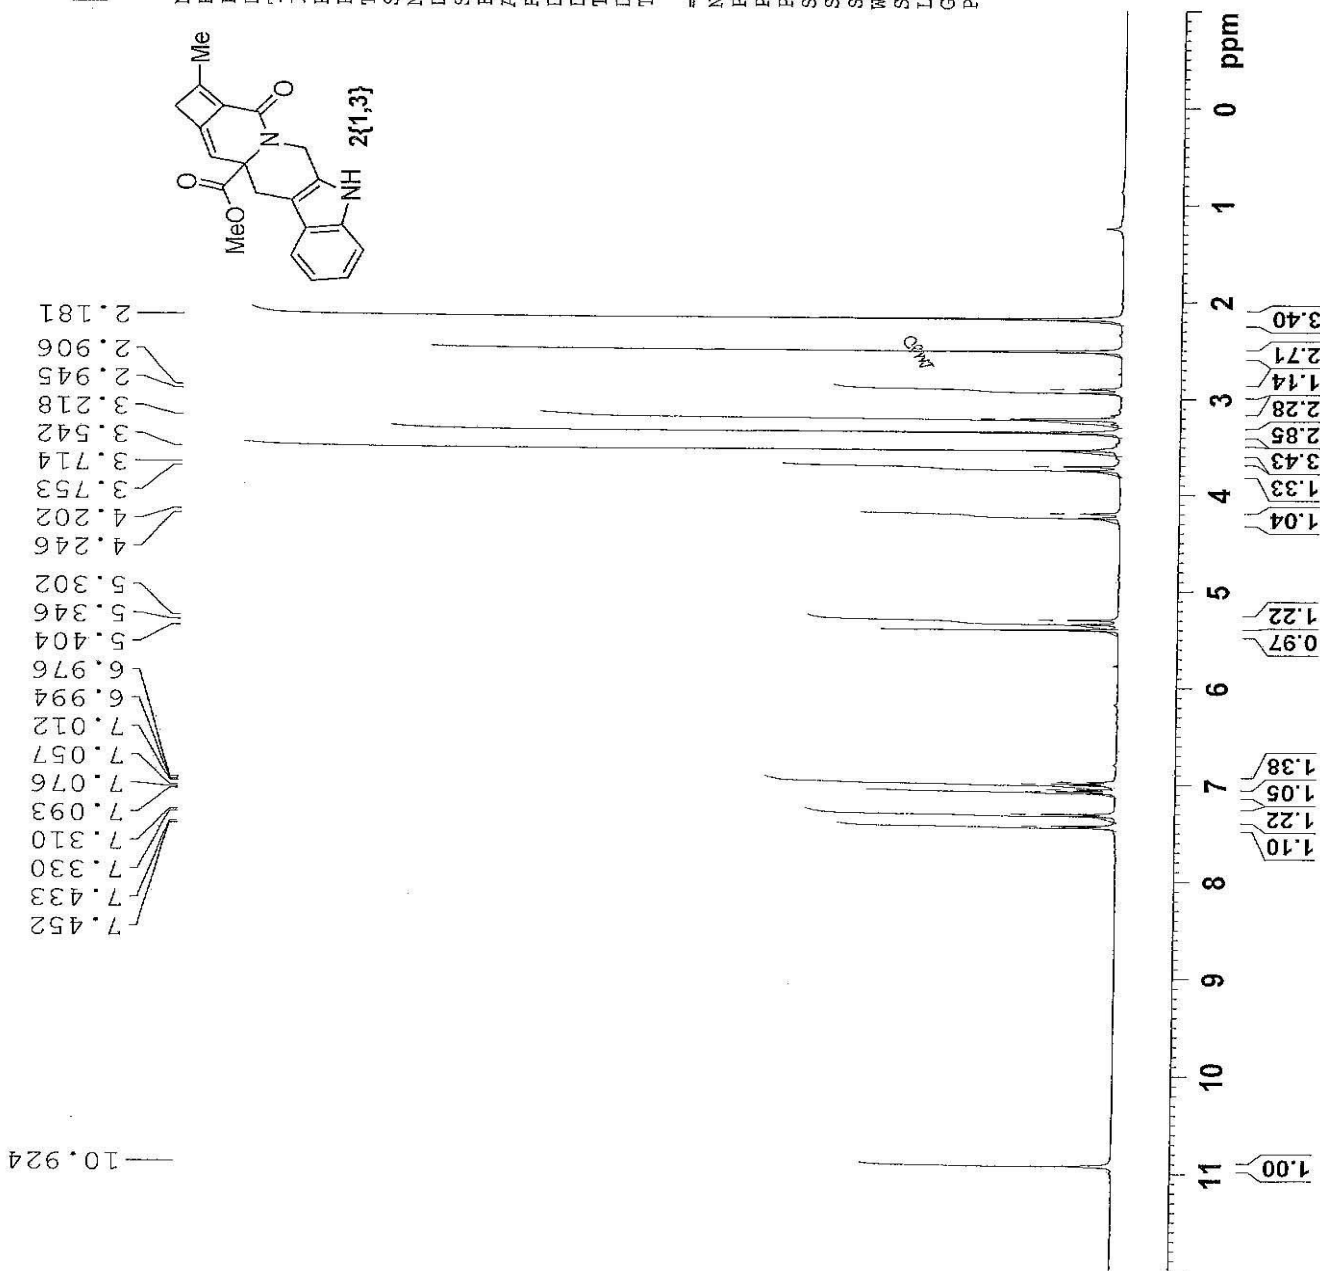

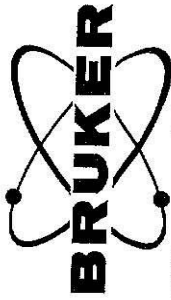

NAME JRG-348-35  
EXPNO 2  
PROCNO 1  
Date\_ 20110629  
Time\_ 9.22  
INSTRUM spect  
PROBHD 5 mm PABBO BB-  
PULPROG zgpg30  
TD 65536  
SOLVENT DMSO  
NS 1200  
DS 4  
SWH 24038.461 Hz  
FIDRES 0.366798 Hz  
AQ 1.3631988 sec  
RG 203  
DW 20.800 usec  
DE 6.50 usec  
TE 295.2 K  
D1 3.00000000 sec  
D11 0.03000000 sec  
TD0 1

=====  
CHANNEL f1  
NUC1 13C  
PI 10.00 usec  
PL1 -1.59 dB  
PL1W 51.07626343 W  
SFO1 100.6479773 MHz  
=====

=====  
CHANNEL f2  
CPDPRG2 waltz16  
NUC2 1H  
PCPD2 75.00 usec  
PL2 -1.00 dB  
PL12 13.39 dB  
PL13 20.00 dB  
PL2W 11.09959412 W  
PL12W 0.40393090 W  
PL13W 0.08816721 W  
SFO2 400.2316009 MHz  
SI 32768  
SF 100.6379140 MHz  
WDW EM  
SSB 0  
LB 1.00 Hz  
GB 0  
PC 1.40

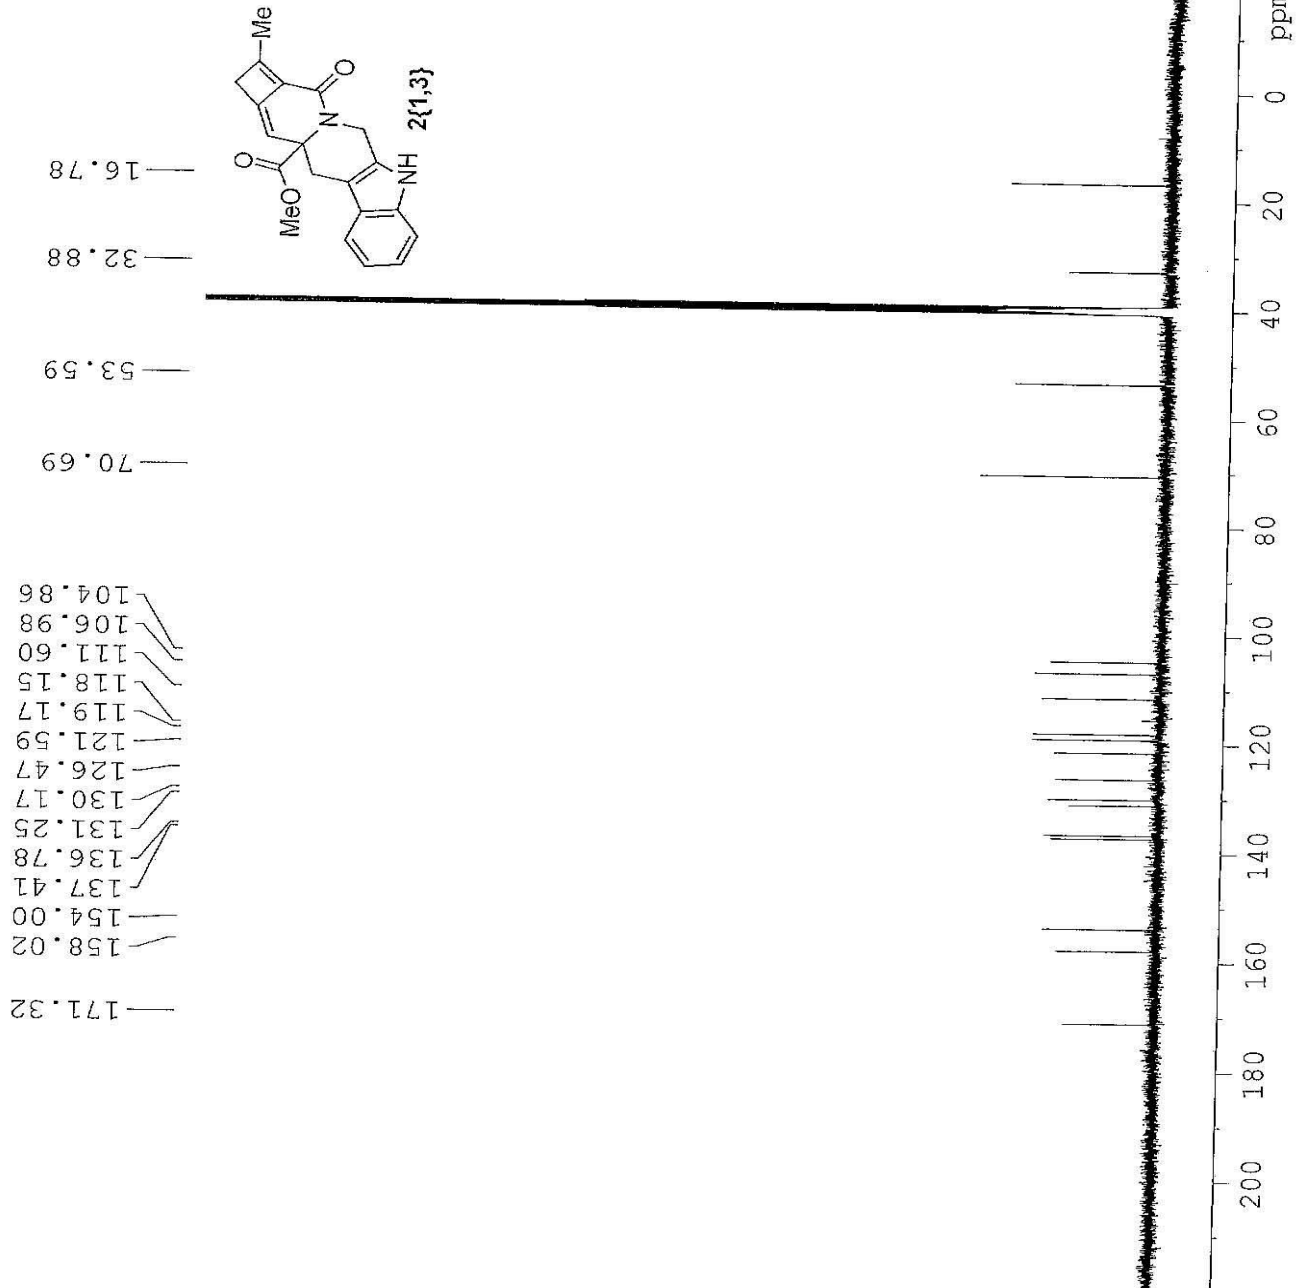



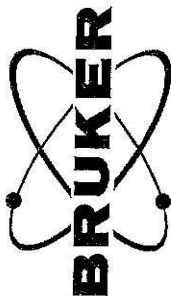

NAME JRG-348-70re  
 EXPNO 1  
 PROCNO 1  
 Date 20110726  
 Time 23.18  
 INSTRUM spect  
 PROBHD 5 mm PABBO BB-  
 PULPROG zg30  
 TD 65536  
 SOLVENT CDCl3  
 NS 6  
 DS 2  
 SWH 8223.685 Hz  
 FIDRES 0.125483 Hz  
 AQ 3.9846387 sec  
 RG 101  
 DW 60.800 usec  
 DE 6.50 usec  
 TE 295.2 K  
 D1 2.00000000 sec  
 TD0 1

==== CHANNEL f1 =====  
 NUC1 1H  
 P1 14.31 usec  
 PL1 -1.00 dB  
 PL1W 11.09959412 W  
 SFO1 400.2324716 MHz  
 SI 32768  
 SF 400.2300000 MHz  
 EM 0  
 LB 0.30 Hz  
 GB 0  
 PC 1.00

1.183  
 1.999  
 2.014  
 2.019  
 2.025  
 2.031  
 2.039  
 2.046  
 2.064  
 2.086  
 3.048  
 3.059  
 3.086  
 3.091  
 3.098  
 3.112  
 3.632  
 3.799  
 3.840  
 4.545  
 4.588  
 5.284  
 5.326  
 5.581  
 5.624  
 7.108  
 7.126  
 7.143  
 7.145  
 7.162  
 7.165  
 7.182  
 7.199  
 7.292  
 7.371  
 7.391  
 7.511  
 7.530  
 9.086

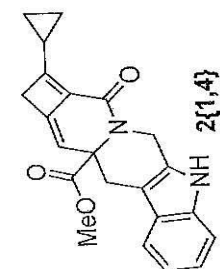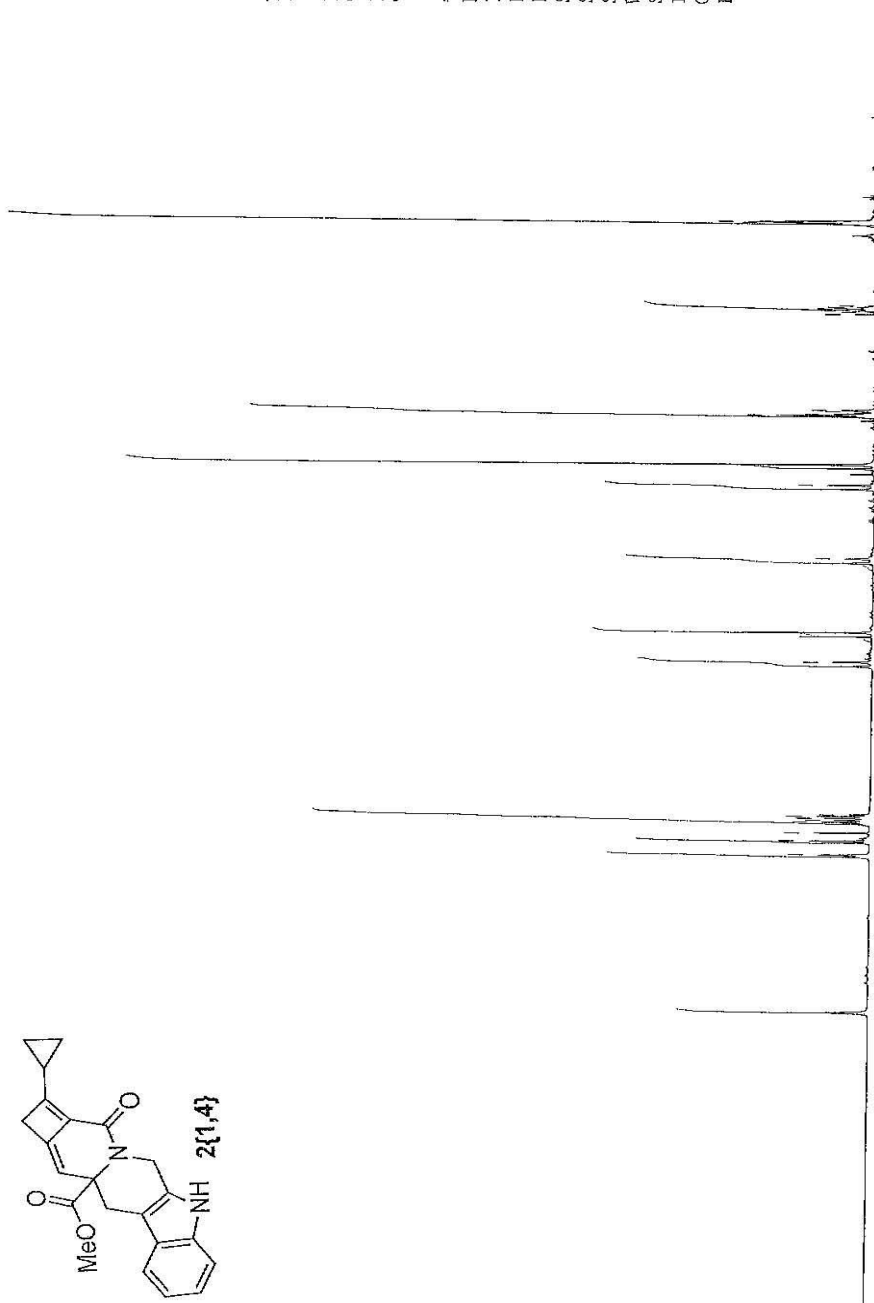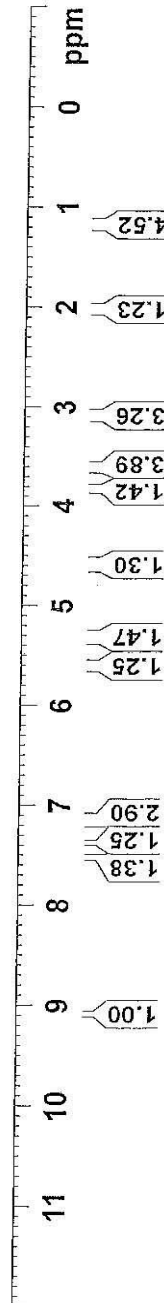

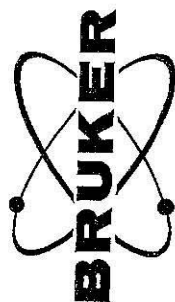

NAME JRG-348-70re  
 EXPNO 2  
 PROCNO 1  
 Date\_ 20110726  
 Time 23.30  
 INSTRUM Spect  
 PROBHD 5 mm PABBO BB-  
 PULPROG zgpg30  
 TD 65536  
 SOLVENT CDCl3  
 NS 133  
 DS 4  
 SWH 24038.461 Hz  
 FIDRES 0.366798 Hz  
 AQ 1.3631988 sec  
 RG 203  
 DW 20.800 usec  
 DE 6.50 usec  
 TE 295.6 K  
 D1 3.00000000 sec  
 D11 0.03000000 sec  
 TD0 1

==== CHANNEL f1 =====  
 NUC1 13C  
 P1 10.00 usec  
 PL1 -1.59 dB  
 PL1W 51.07626343 W  
 SFO1 100.6479773 MHz

==== CHANNEL f2 =====  
 CPDPRG2 waltz16  
 NUC2 1H  
 PCPD2 75.00 usec  
 PL2 -1.00 dB  
 PL12 13.39 dB  
 PL13 20.00 dB  
 PL1W 11.09959412 W  
 PL12W 0.40393090 W  
 PL13W 0.08816721 W  
 SFO2 400.2316009 MHz

SI 32768  
 SF 100.6379210 MHz  
 WDW EM  
 SSB 0  
 LB 1.00 Hz  
 GB 0  
 PC 1.40

171.31  
 160.41  
 158.54  
 136.66  
 136.37  
 129.65  
 128.24  
 126.44  
 121.60  
 119.23  
 117.91  
 111.00  
 105.53  
 105.49  
 70.84  
 53.04  
 39.74  
 37.06  
 32.95  
 12.94  
 10.13  
 9.99

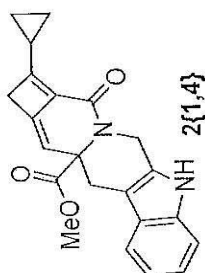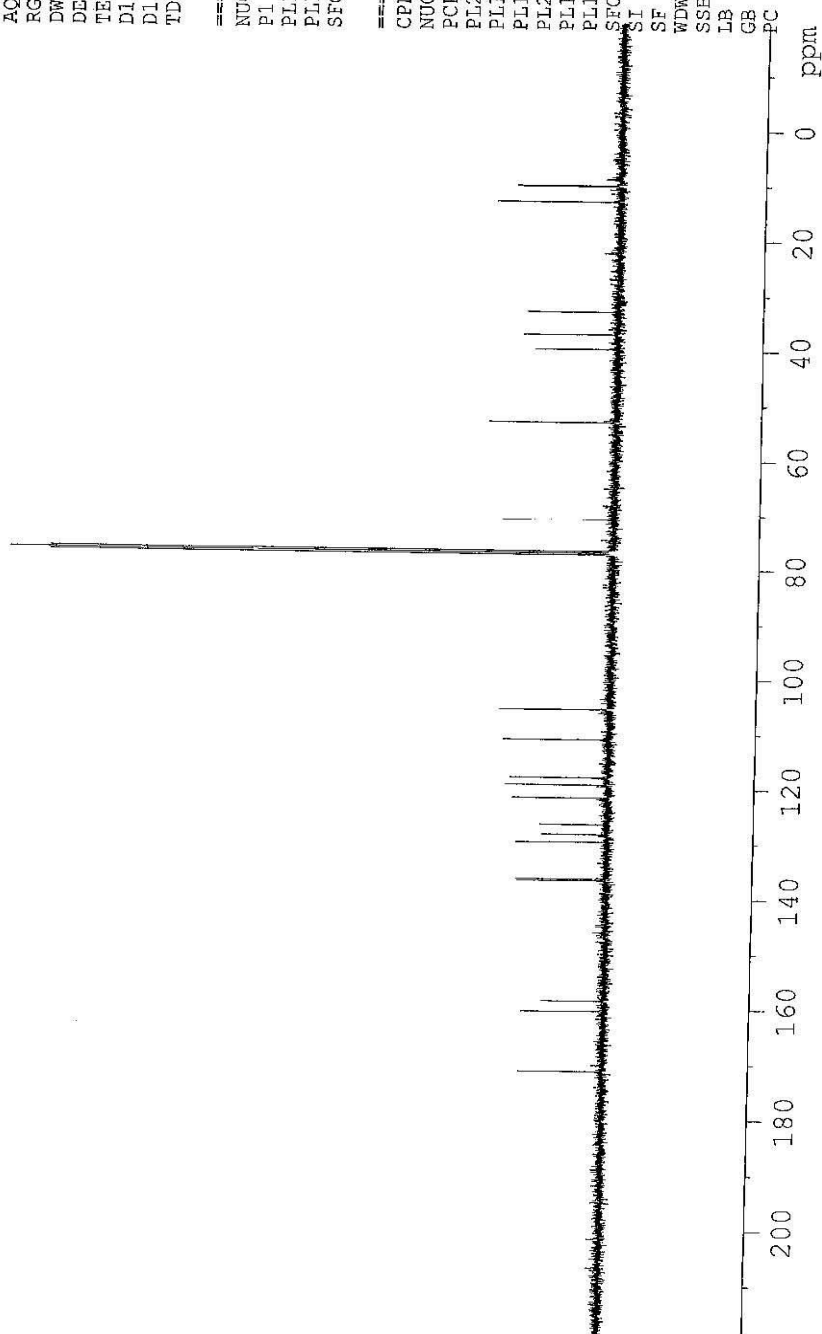

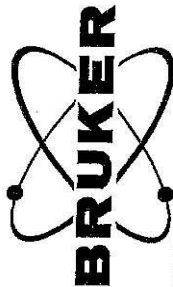

NAME JRG-348-30 DMSO  
 EXPNO 1  
 PROCNO 1  
 Date 20110628  
 Time 9.39  
 INSTRUM spect  
 PROBHD 5 mm PABBO BB-  
 PULPROG zg30  
 TD 65536  
 SOLVENT DMSO  
 NS 3  
 DS 2  
 SWH 8223.685 Hz  
 FIDRES 0.125483 Hz  
 AQ 3.9846387 sec  
 RG 128  
 DW 60.800 usec  
 DE 6.50 usec  
 TE 295.3 K  
 D1 2.00000000 sec  
 TD0 1

===== CHANNEL f1 =====  
 NUC1 1H  
 P1 14.31 usec  
 PL1 -1.00 dB  
 PL1W 11.09959412 W  
 SFO1 400.2324716 MHz  
 SI 32768  
 SF 400.2300000 MHz  
 WDW EM  
 SSB 0  
 LB 0.30 Hz  
 GB 0  
 PC 1.00

11.009  
 8.246  
 8.226  
 7.883  
 7.863  
 7.476  
 7.456  
 7.345  
 7.325  
 7.110  
 7.108  
 7.090  
 7.073  
 7.070  
 7.030  
 7.028  
 7.010  
 6.993  
 6.991  
 5.801  
 5.772  
 5.467  
 5.422  
 4.388  
 4.344  
 3.824  
 3.786  
 3.676  
 3.670  
 3.571  
 3.359  
 3.044  
 3.005

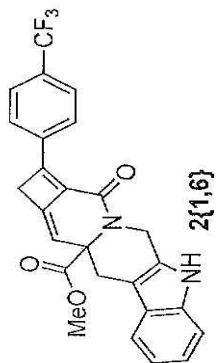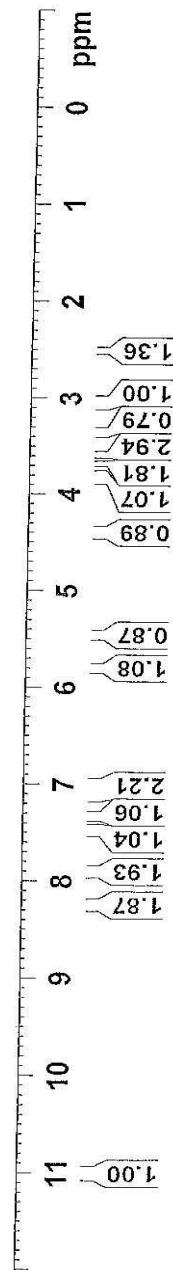

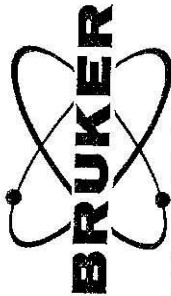

NAME JRG-348-30\_DMSO  
 EXPNO 3  
 PROCNO 1  
 Date 20110628  
 Time 13.00  
 INSTRUM spect  
 PROBHD 5 mm PABBO BB-  
 PULPROG zgpg30  
 TD 65536  
 SOLVENT DMSO  
 NS 700  
 DS 4  
 SWH 24038.461 Hz  
 FIDRES 0.366798 Hz  
 AQ 1.3631988 sec  
 RG 203  
 DW 20.800 usec  
 DE 6.50 usec  
 TE 295.8 K  
 D1 3.0000000 sec  
 D11 0.0300000 sec  
 TD0 1

===== CHANNEL f1 =====  
 NUC1 13C  
 P1 10.00 usec  
 PL1 -1.59 dB  
 PL1W 51.07626343 W  
 SFO1 100.6479773 MHz

===== CHANNEL f2 =====  
 CPDPRG2 waltz16  
 NUC2 1H  
 PCPD2 75.00 usec  
 PL2 -1.00 dB  
 PL12 13.39 dB  
 PL13 20.00 dB  
 PL2W 11.09959412 W  
 PL12W 0.40393090 W  
 PL13W 0.08816721 W  
 SFO2 400.2316009 MHz  
 SI 32768  
 SF 100.6379140 MHz  
 WDW EM  
 SSB 0  
 LB 1.00 Hz  
 GB 0  
 PC 1.40

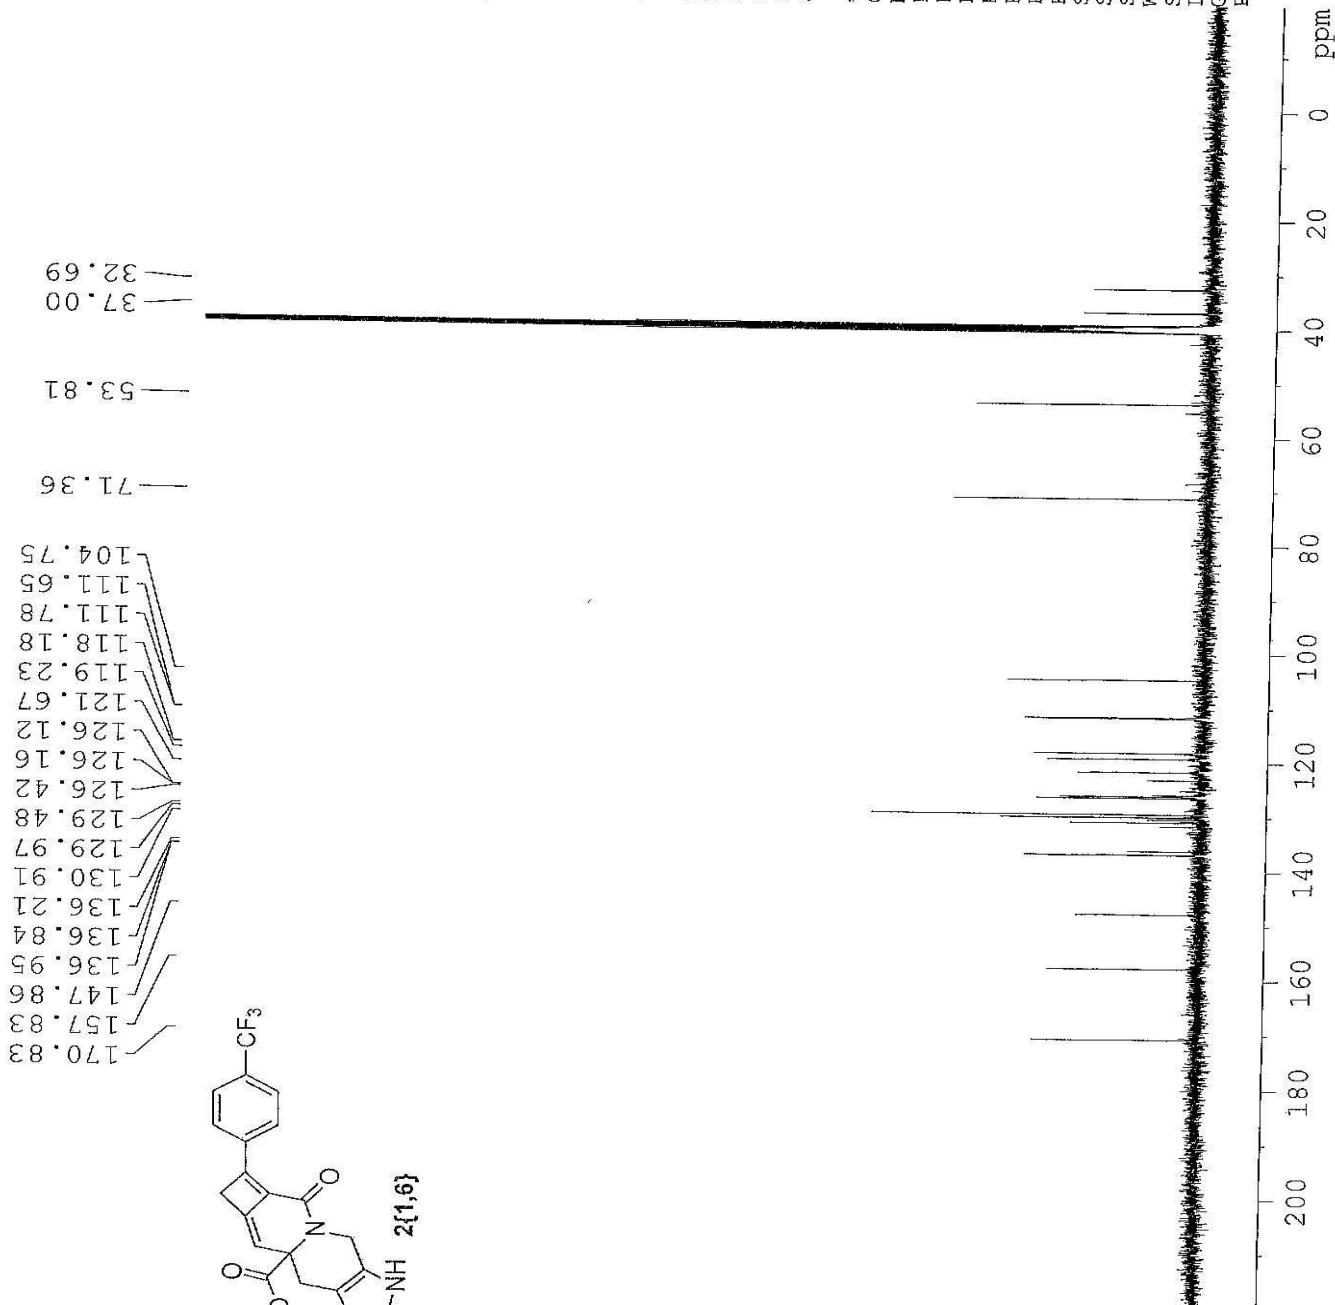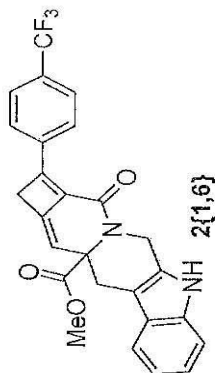

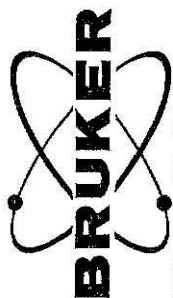

NAME JRG-348-27\_DMSO  
 EXPNO 1  
 PROCNO 1  
 Date\_ 20110627  
 Time\_ 15.18  
 INSTRUM spect  
 PROBD 5 mm PABBO BB-  
 PULPROG zg30  
 TD 65536  
 SOLVENT DMSO  
 NS 4  
 DS 2  
 SWH 8223.685 Hz  
 FIDRES 0.125483 Hz  
 AQ 3.9846387 sec  
 RG 101  
 DW 60.800 usec  
 DE 6.50 usec  
 TE 294.8 K  
 D1 2.00000000 sec  
 TD0 1

===== CHANNEL f1 =====  
 NUC1 1H  
 P1 14.31 usec  
 PL1 -1.00 dB  
 PL1W 11.09959412 W  
 SF01 400.2324716 MHz  
 SI 32768  
 SF 400.2300000 MHz  
 WDW EM  
 SSB 0  
 LB 0.30 Hz  
 GB 0  
 PC 1.00

8.072  
 8.055  
 7.532  
 7.516  
 7.497  
 7.474  
 7.455  
 7.346  
 7.326  
 7.108  
 7.090  
 7.071  
 7.027  
 7.009  
 6.991  
 5.678  
 5.457  
 5.412  
 4.370  
 4.325  
 3.811  
 3.772  
 3.564  
 3.032  
 2.994

10.995

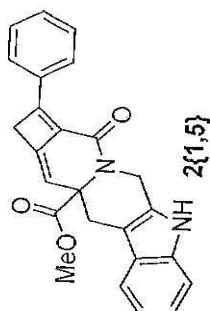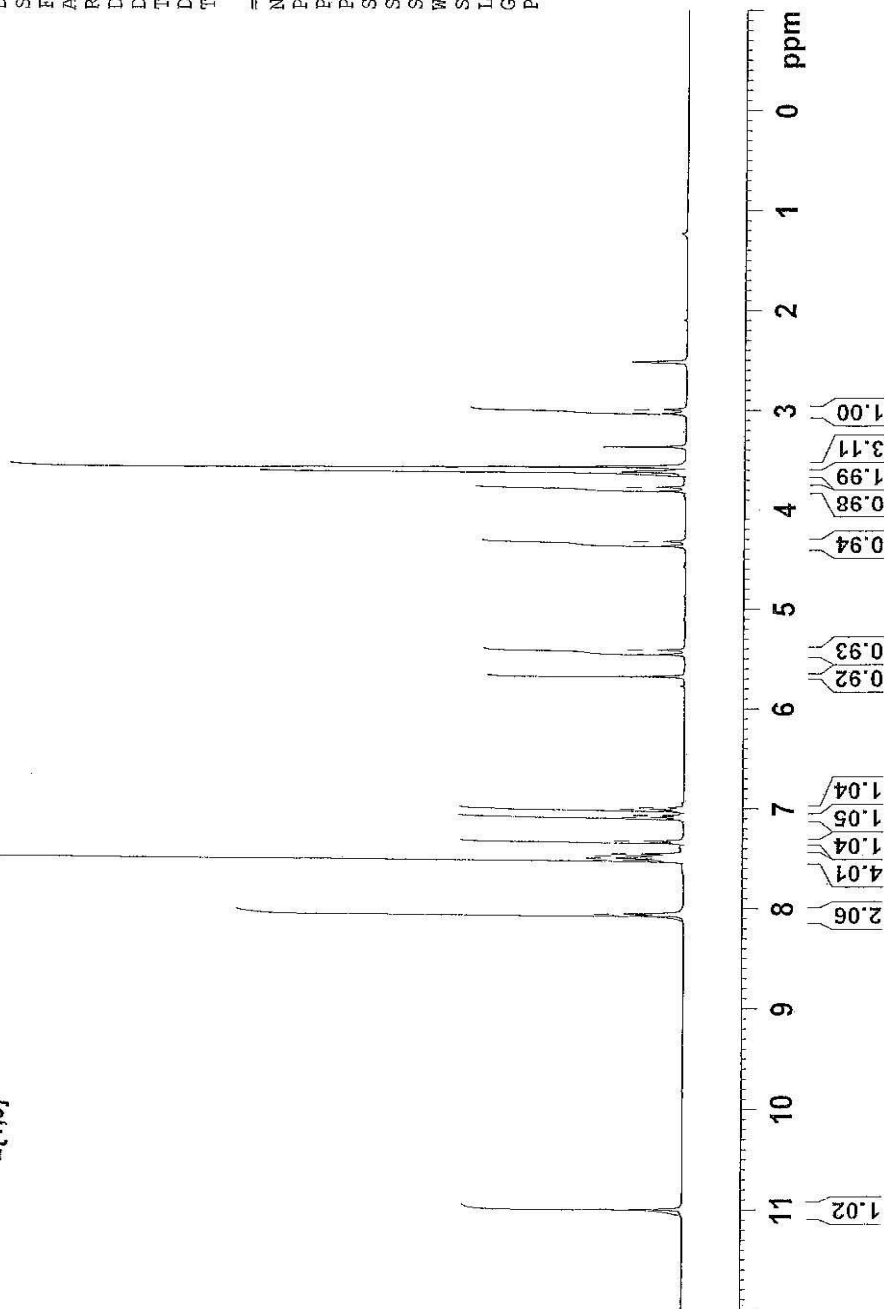

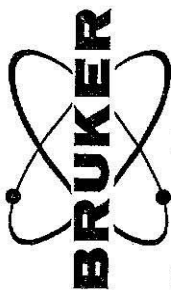

NAME JRG-348-27\_DMSO  
 EXPNO 2  
 PROCNO 1  
 Date\_ 20110627  
 Time\_ 15.30  
 INSTRUM spect  
 PROBD 5 mm PABBO BB-  
 PULPROG zgpg30  
 TD 65536  
 SOLVENT DMSO  
 NS 200  
 DS 4  
 SWH 24038.461 Hz  
 FIDRES 0.366798 Hz  
 AQC 1.3631988 sec  
 RG 203  
 DW 20.800 usec  
 DE 6.50 usec  
 TE 295.5 K  
 D1 3.00000000 sec  
 D11 0.03000000 sec  
 TD0 1

CHANNEL f1  
 NUC1 13C  
 P1 10.00 usec  
 PL1 -1.59 dB  
 PL1W 51.07626343 W  
 SF01 100.6479773 MHz

CHANNEL f2  
 CPDPRG2 waltz16  
 NUC2 1H  
 PCPD2 75.00 usec  
 PL2 -1.00 dB  
 PL12 13.39 dB  
 PL13 20.00 dB  
 PL2W 11.09959412 W  
 PL12W 0.40393090 W  
 PL13W 0.08816721 W  
 SF02 400.2316009 MHz  
 SI 32768  
 SF 100.6379140 MHz  
 WDW EM  
 SSB 0  
 LB 1.00 Hz  
 GB 0  
 PC 1.40

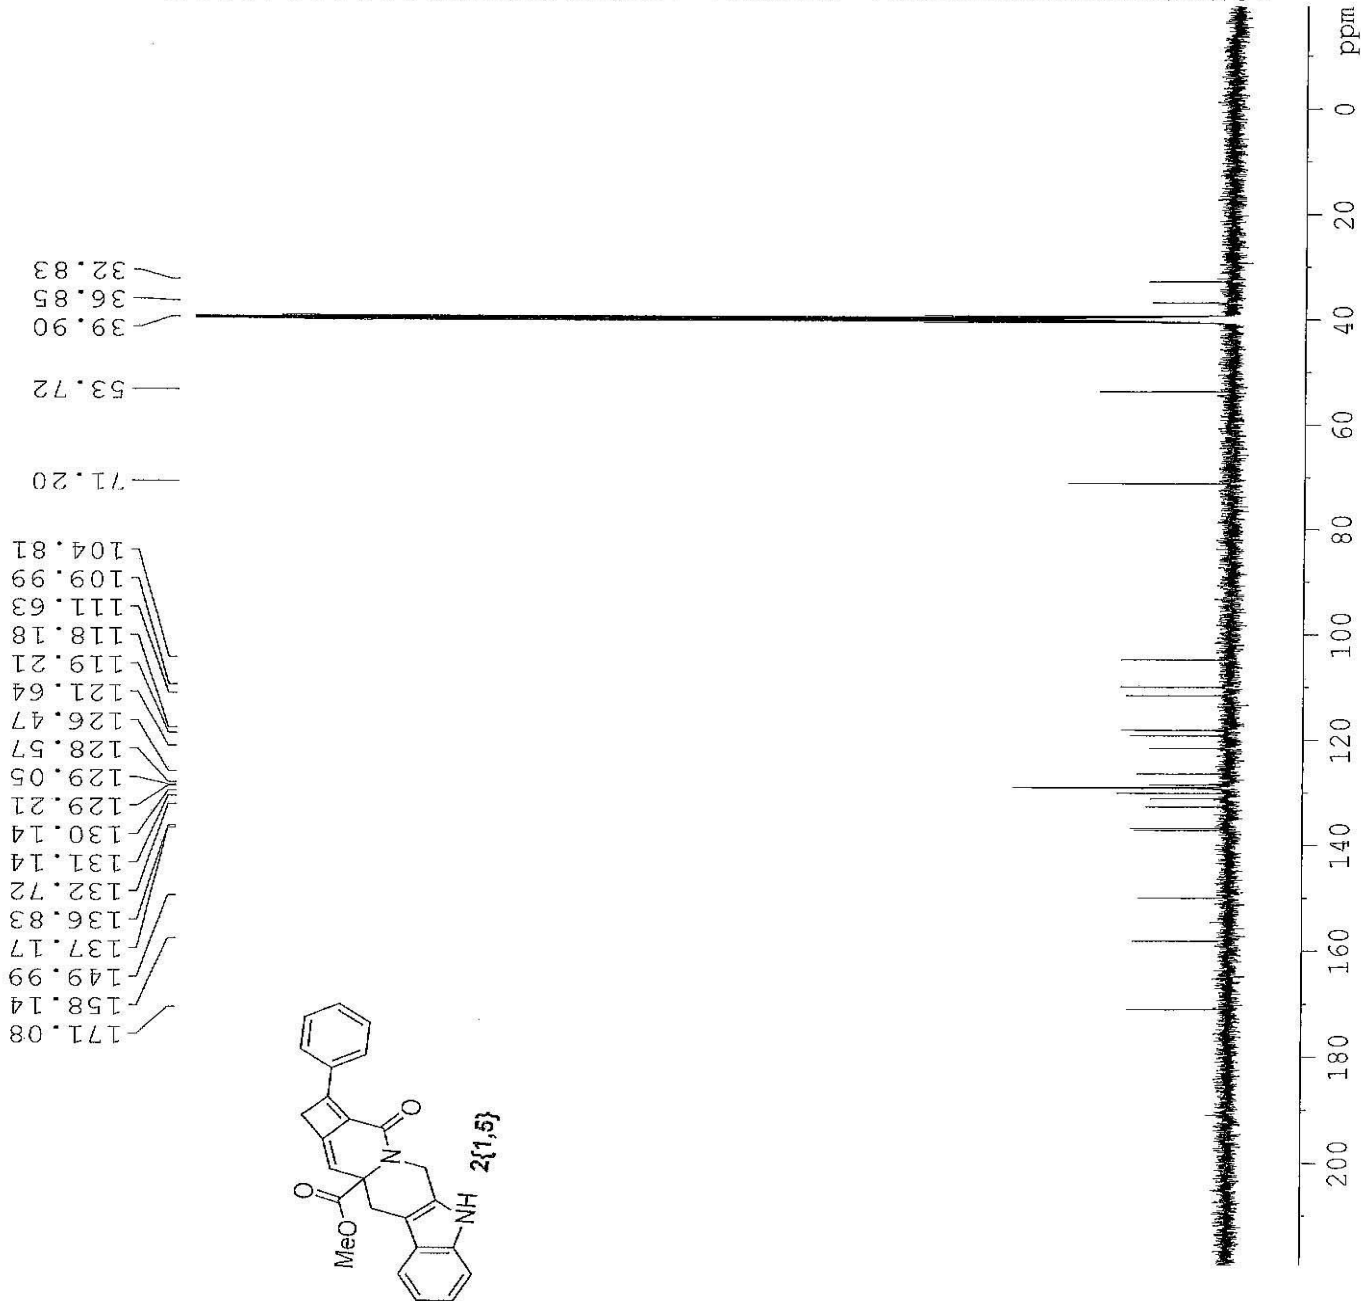

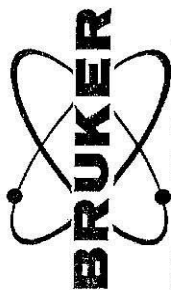

NAME JRG-348-31\_DMSO

EXPNO 1

PROCNO 1

Date 20110628

Time 9.11

INSTRUM spect

PROBHD 5 mm PABBO BB-

PULPROG zg30

TD 65536

SOLVENT DMSO

NS 5

DS 2

SWH 8223.685 Hz

FIDRES 0.125483 Hz

AQ 3.9846387 sec

RG 144

DW 60.800 usec

DE 6.50 usec

TE 295.2 K

DI 2.0000000 sec

TD0 1

===== CHANNEL f1 =====

NUC1 1H

P1 14.31 usec

PL1 -1.00 dB

PL1W 11.09959412 W

SFO1 400.2324716 MHz

SI 32768

SF 400.2300000 MHz

WDW EM

SSB 0

LB 0.30 Hz

GB 0

PC 1.00

8.030  
8.008  
7.468  
7.449  
7.339  
7.319  
7.104  
7.101  
7.088  
7.066  
7.023  
7.021  
7.003  
6.986  
6.984  
5.570  
5.437  
5.393  
4.343  
4.298  
3.849  
3.793  
3.755  
3.571  
3.558  
3.352  
3.019  
2.981

10.975

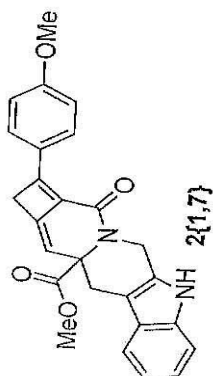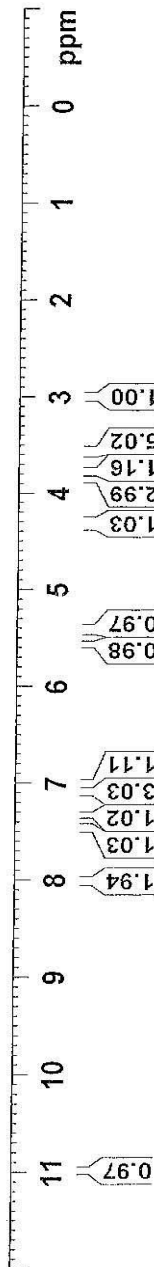

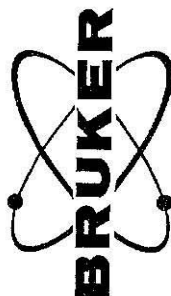

NAME JRG-348-31 DMSO  
 EXPNO 2  
 PROCNO 1  
 Date 20110628  
 Time 9.35  
 INSTRUM spect  
 PROBD 5 mm PABBO BB-  
 PULPROG zgpg30  
 TD 65536  
 SOLVENT DMSO  
 NS 300  
 DS 4  
 SWH 24038.461 Hz  
 FIDRES 0.366798 Hz  
 AQ 1.3631988 sec  
 RG 203  
 DW 20.800 usec  
 DE 6.50 usec  
 TE 295.8 K  
 D1 3.00000000 sec  
 D11 0.03000000 sec  
 TDO 1

CHANNEL f1  
 NUC1 13C  
 P1 10.00 usec  
 PL1 -1.59 dB  
 PL1W 51.07626343 W  
 SFO1 100.6479773 MHz

CHANNEL f2  
 CPDPRG2 waltz16  
 NUC2 1H  
 PCPD2 75.00 usec  
 PL2 -1.00 dB  
 PL12 13.39 dB  
 PL13 20.00 dB  
 PL2W 11.09959412 W  
 PL12W 0.40393090 W  
 PL13W 0.08816721 W  
 SFO2 400.2316009 MHz  
 SI 32768  
 SF 100.6379140 MHz  
 WDW EM  
 SSB 0  
 LB 1.00 Hz  
 GB 0  
 PC 1.40

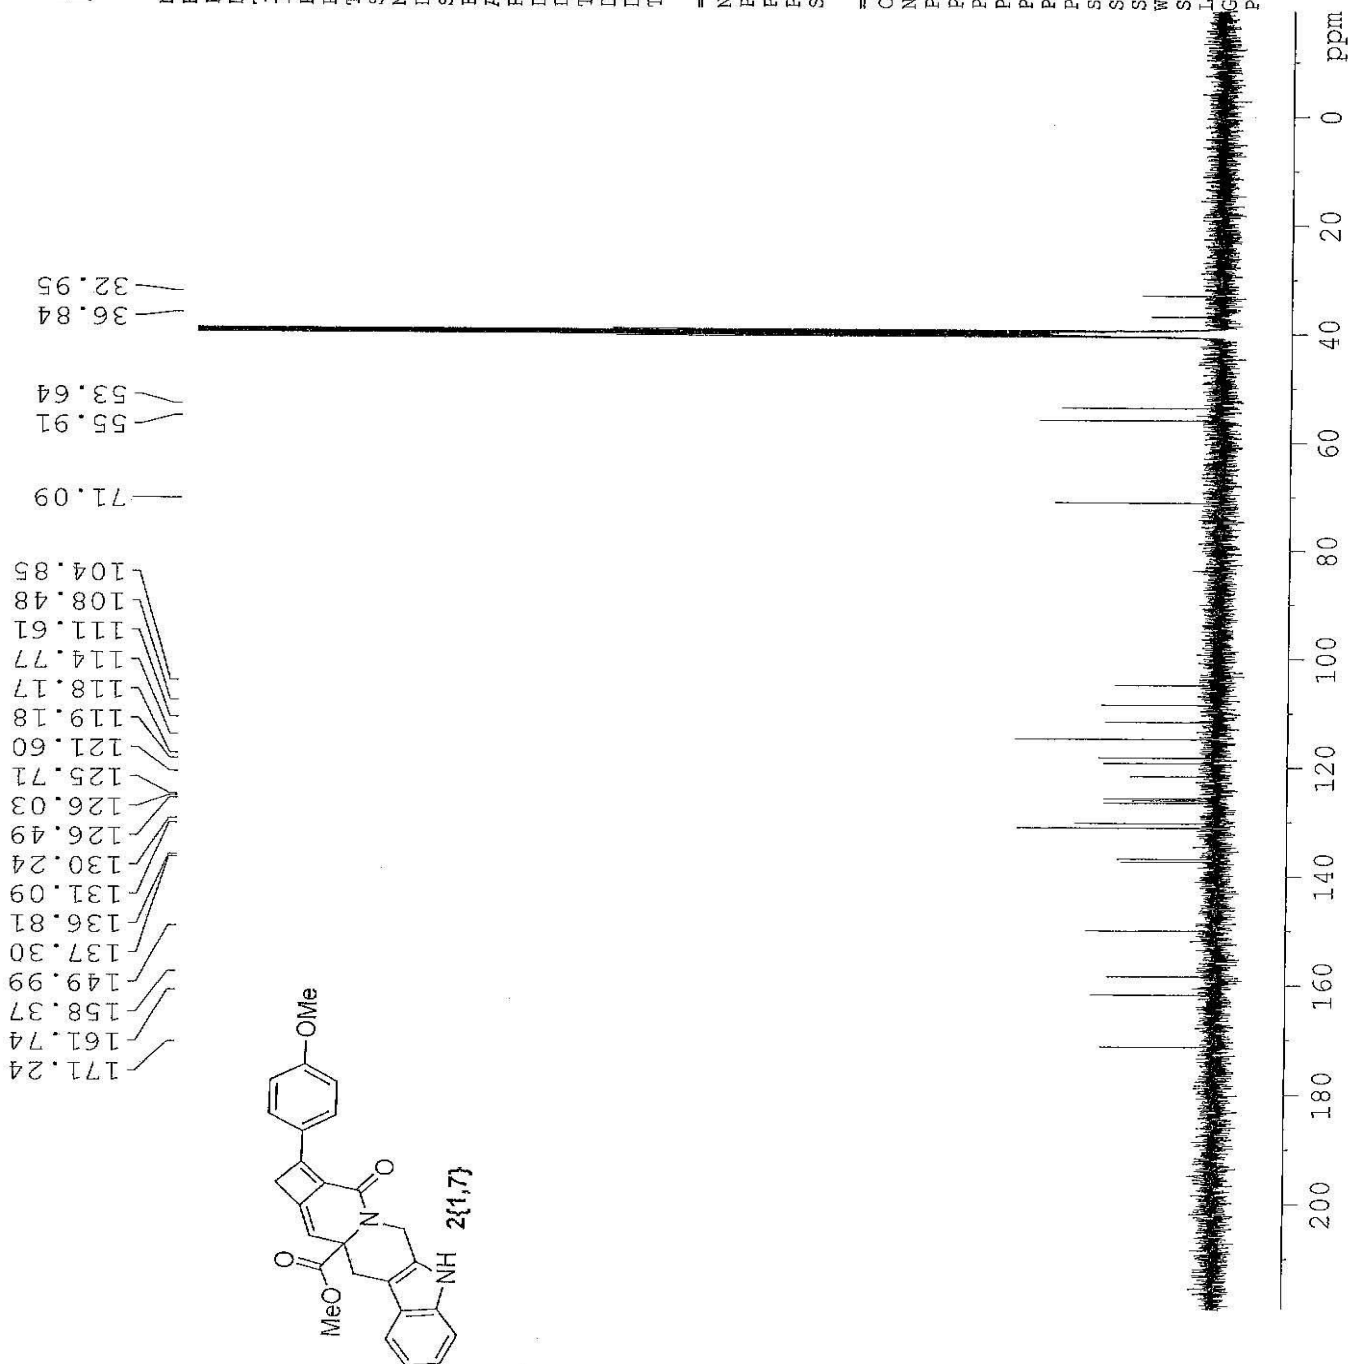



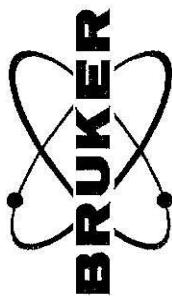

NAME JRG-348-32\_DMSO  
 EXPNO 1  
 PROCNO 1  
 Date\_ 20110627  
 Time 15.39  
 INSTRUM spect  
 PROBHD 5 mm PABBO BB-  
 PULPROG zg30  
 TD 65536  
 SOLVENT DMSO  
 NS 4  
 DS 2  
 SWH 8223.685 Hz  
 FIDRES 0.125483 Hz  
 AQ 3.9846387 sec  
 RG 128  
 DW 60.800 usec  
 DE 6.50 usec  
 TE 295.0 K  
 D1 2.00000000 sec  
 TD0 1

===== CHANNEL f1 =====  
 NUC1 1H  
 P1 14.31 usec  
 PL1 -1.00 dB  
 PL1W 11.09959412 W  
 SF01 400.2324716 MHz  
 SI 32768  
 SF 400.2300000 MHz  
 WDW EM  
 SSB 0  
 LB 0.30 Hz  
 GB 0  
 PC 1.00

10.969  
 7.476  
 7.466  
 7.443  
 7.336  
 7.316  
 7.099  
 7.081  
 7.063  
 7.019  
 7.000  
 6.982  
 6.945  
 6.938  
 5.569  
 5.407  
 5.363  
 4.312  
 4.267  
 3.579  
 3.568  
 3.556  
 3.013  
 2.974  
 2.520  
 2.516

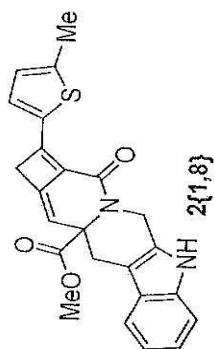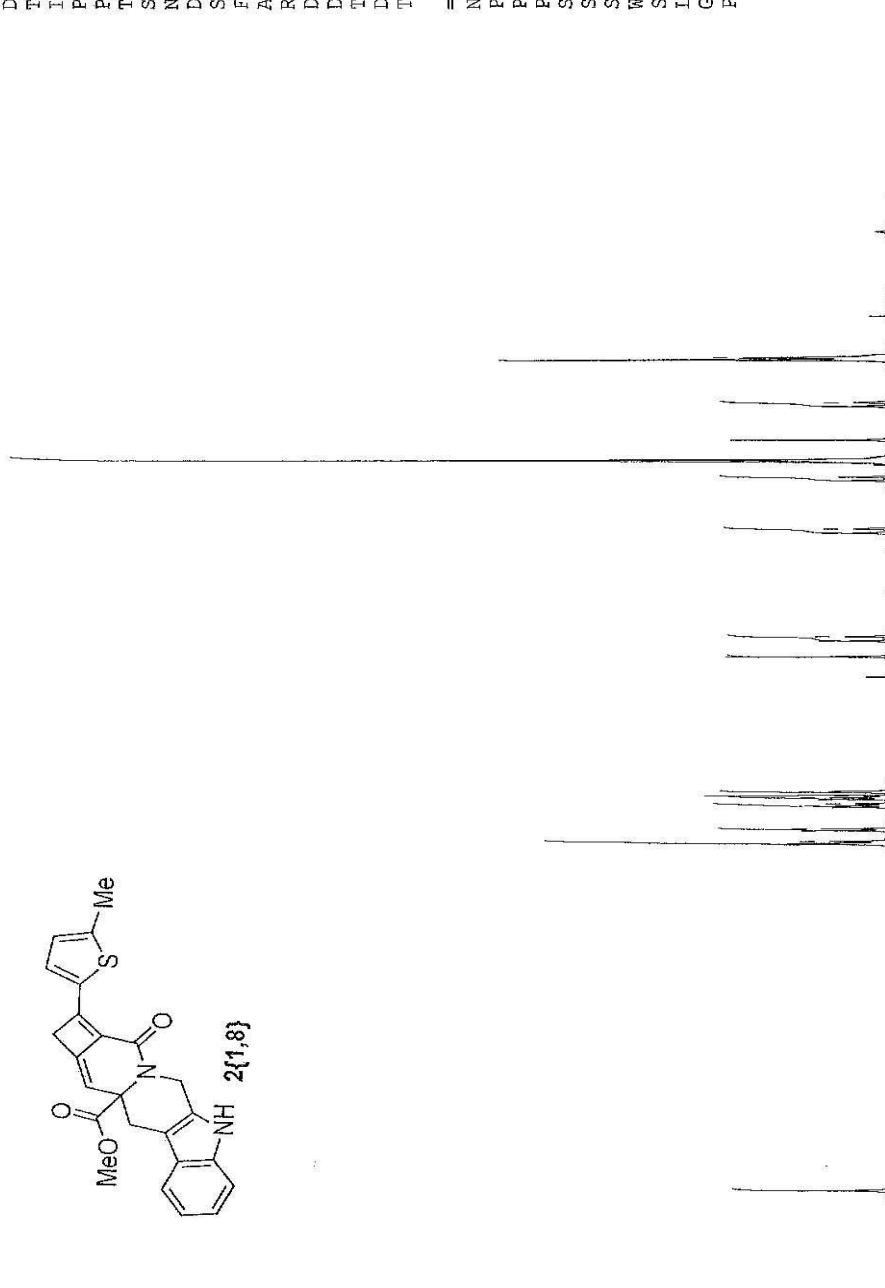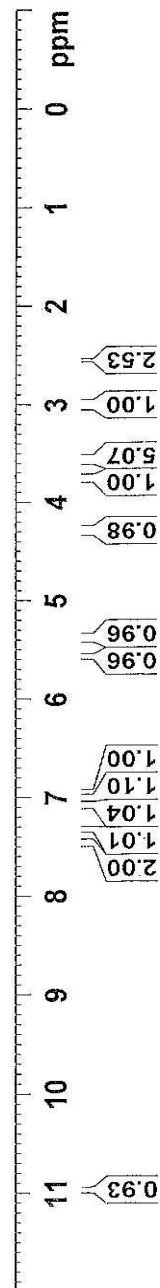

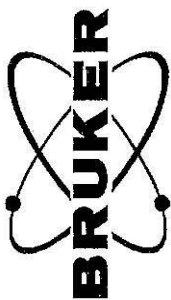

NAME JRG-348-32 DMSO  
 EXPNO 2  
 PROCNO 1  
 Date\_ 20110627  
 Time\_ 16.03  
 INSTRUM spect  
 PROBD 5 mm PABBO BB-  
 PULPROG zgpg30  
 TD 65536  
 SOLVENT DMSO  
 NS 299  
 DS 4  
 SWH 24038.461 Hz  
 FIDRES 0.366798 Hz  
 AQ 1.3631988 sec  
 RG 203  
 DW 20.800 usec  
 DE 6.50 usec  
 TE 295.6 K  
 D1 3.00000000 sec  
 D11 0.03000000 sec  
 TD0 1

===== CHANNEL f1 =====  
 NUC1 13C  
 P1 10.00 usec  
 PL1 -1.59 dB  
 PL1W 51.07626343 W  
 SFO1 100.6479773 MHz

===== CHANNEL f2 =====  
 CPDPRG2 waltz16  
 NUC2 1H  
 PCPD2 75.00 usec  
 PL2 -1.00 dB  
 PL12 13.39 dB  
 PL13 20.00 dB  
 PL2W 11.09959412 W  
 PL12W 0.40393090 W  
 PL13W 0.08816721 W  
 SFO2 400.2316009 MHz  
 SI 32768  
 SF 100.6379140 MHz  
 EM  
 SSB 0  
 LB 1.00 Hz  
 GB 0  
 PC 1.40

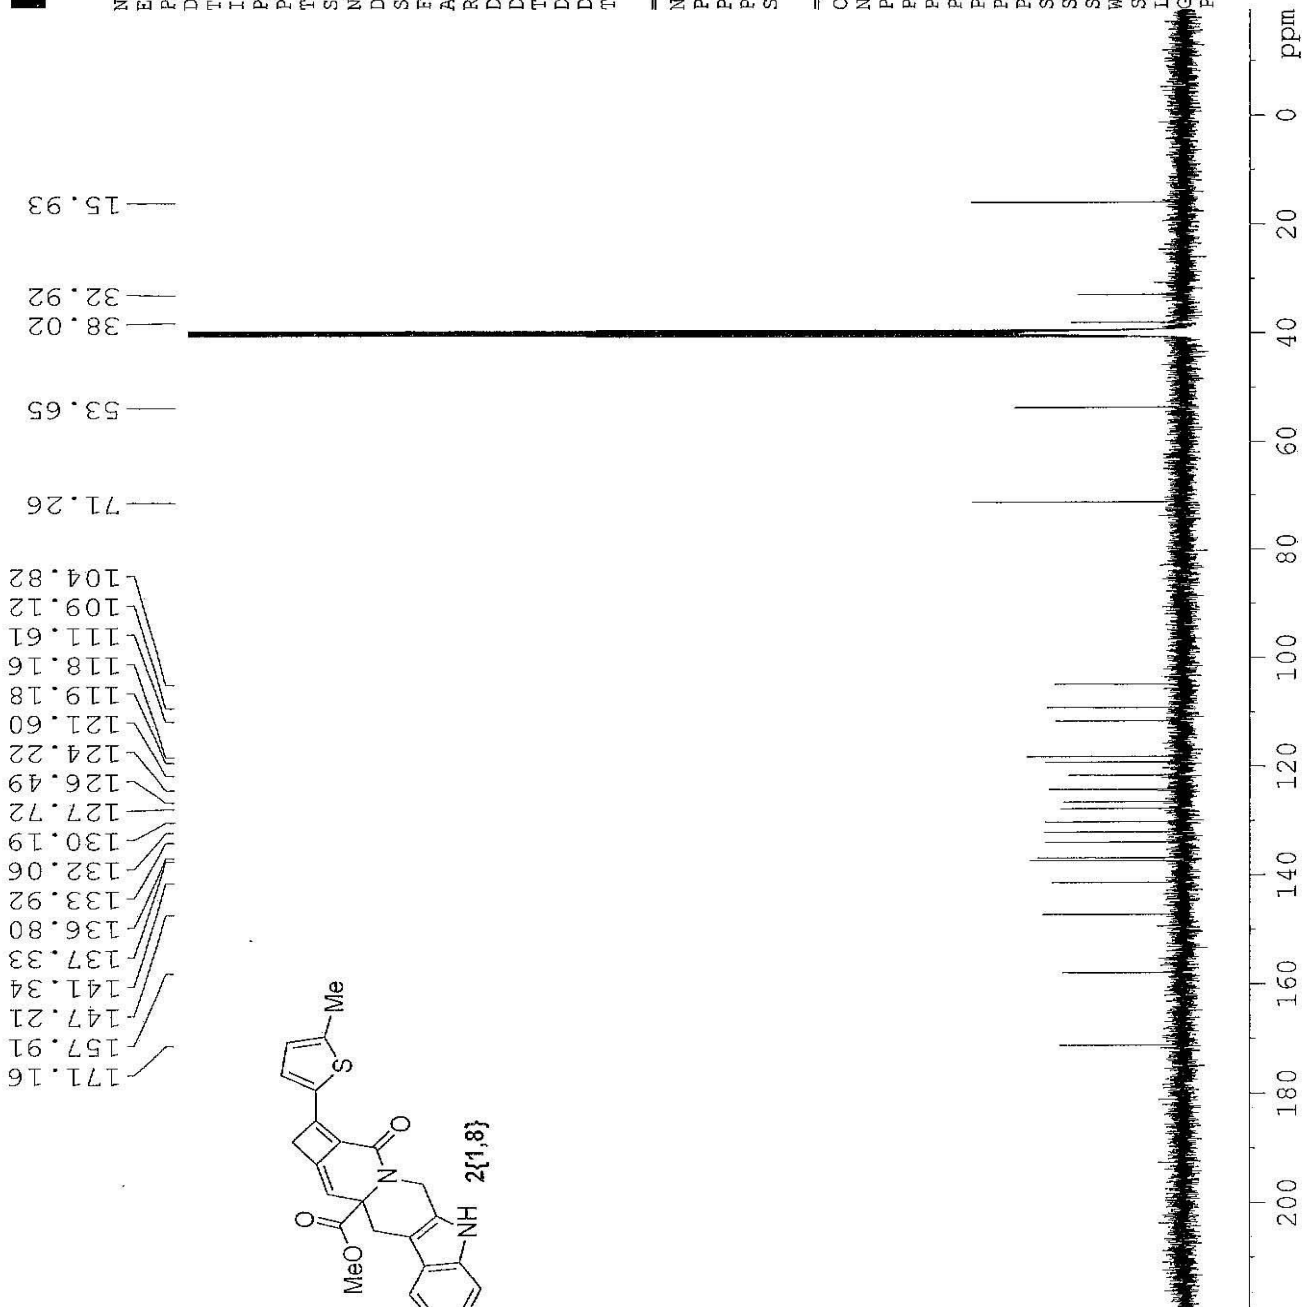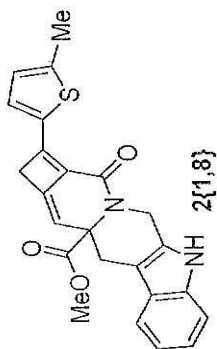

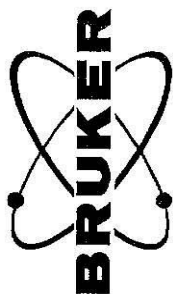

NAME JRG-348-74re  
 EXPNO 1  
 PROCNO 1  
 Date\_ 20110726  
 Time\_ 23.36  
 INSTRUM spect  
 PROBHD 5 mm PABBO BB-  
 PULPROG zg30  
 TD 65536  
 SOLVENT CDCl3  
 NS 6  
 DS 2  
 SWH 8223.685 Hz  
 FIDRES 0.125483 Hz  
 AQ 3.9846387 sec  
 RG 64  
 DW 60.800 usec  
 DE 6.50 usec  
 TE 295.3 K  
 D1 2.00000000 sec  
 TD0 1

===== CHANNEL f1 =====  
 NUC1 1H  
 P1 14.31 usec  
 PL1 -1.00 dB  
 PL1W 11.09959412 W  
 SF01 400.2324716 MHz  
 SI 32768  
 SF 400.2300000 MHz  
 WDW EM  
 SSB 0  
 LB 0.30 Hz  
 GB 0  
 PC 1.00

8.886  
8.657  
7.425  
7.354  
7.342  
7.322  
7.219  
7.216  
7.202  
7.200  
7.188  
7.185  
7.168  
7.132  
7.130  
7.113  
6.430  
6.425  
6.312  
6.307  
5.940  
5.938  
5.734  
5.730  
5.320  
5.287  
3.951  
3.933  
3.772  
3.591  
3.456  
3.091  
2.254  
2.232  
1.615  
1.602  
1.301  
1.153  
1.081  
1.060  
1.013  
1.009  
0.992  
0.988

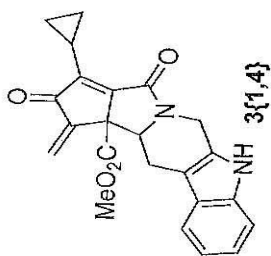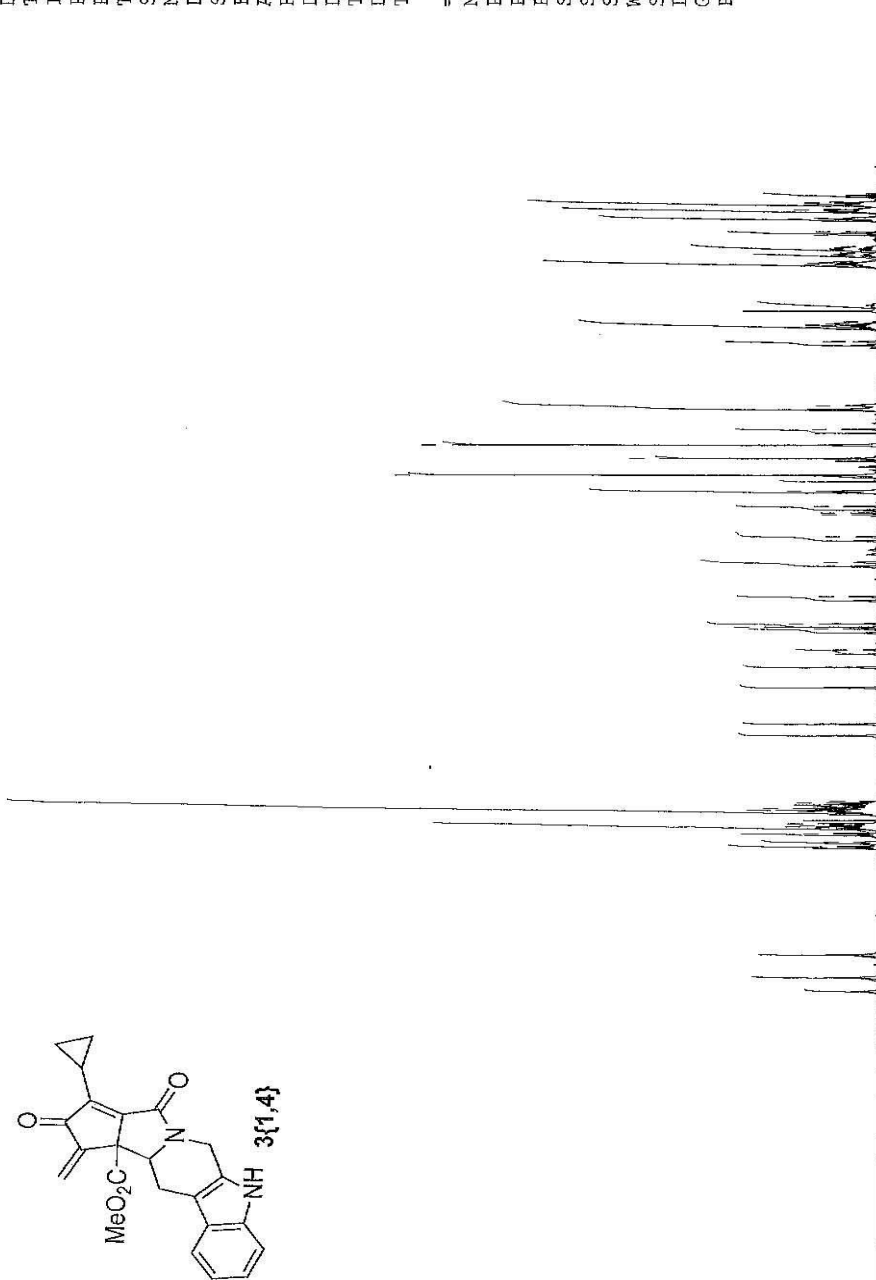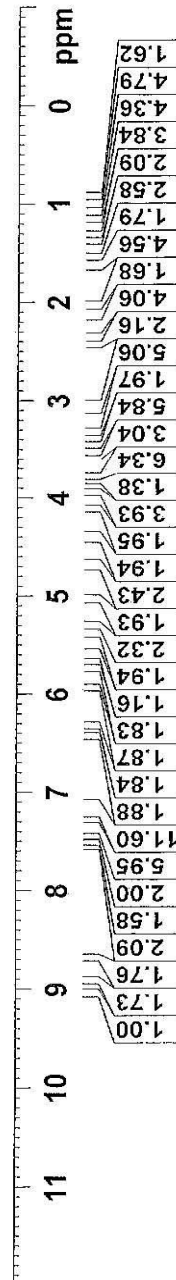

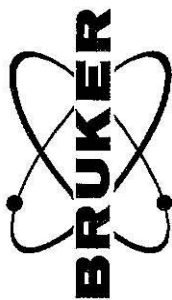

JRG-348-74re

NAME  
EXPNO 2  
PROCNO 1  
Date\_ 20110727  
Time\_ 0.15  
INSTRUM spect  
PROBHD 5 mm PABBO BB-  
PULPROG zgpg30  
TD 65536  
SOLVENT CDCl3  
NS 511  
DS 4  
SWH 24038.461 Hz  
FIDRES 0.366798 Hz  
AQ 1.3631988 sec  
RG 203  
DW 20.800 usec  
DE 6.50 usec  
TE 295.6 K  
D1 3.0000000 sec  
D11 0.0300000 sec  
TD0 1

===== CHANNEL f1 =====  
NUC1 13C  
P1 10.00 usec  
PL1 -1.59 dB  
PL1W 51.07626343 W  
SFO1 100.6479773 MHz

===== CHANNEL f2 =====  
CPDPRG2 waltz16  
NUC2 1H  
PCPD2 75.00 usec  
PL2 -1.00 dB  
PL12 13.39 dB  
PL13 20.00 dB  
PL2W 11.09959412 W  
PL12W 0.40393090 W  
PL13W 0.08816721 W  
SFO2 400.2316009 MHz  
SI 32768  
SF 100.6379251 MHz  
WDW EM  
SSB 0  
LB 1.00 Hz  
GB 0  
PC 1.40

194.41  
171.76  
168.99  
164.25  
151.30  
150.62  
148.69  
147.85  
140.37  
139.96  
136.77  
136.39  
129.07  
127.78  
126.49  
126.11  
122.19  
122.14  
120.72  
119.65  
119.62  
117.99  
117.83  
111.14  
111.03  
105.69  
105.46  
105.10  
69.04  
66.66  
53.21  
52.89  
52.14  
48.05  
39.06  
38.11  
30.65  
24.95  
9.54  
9.17  
8.85  
8.45  
7.98  
7.72

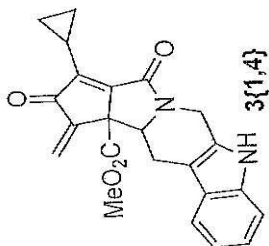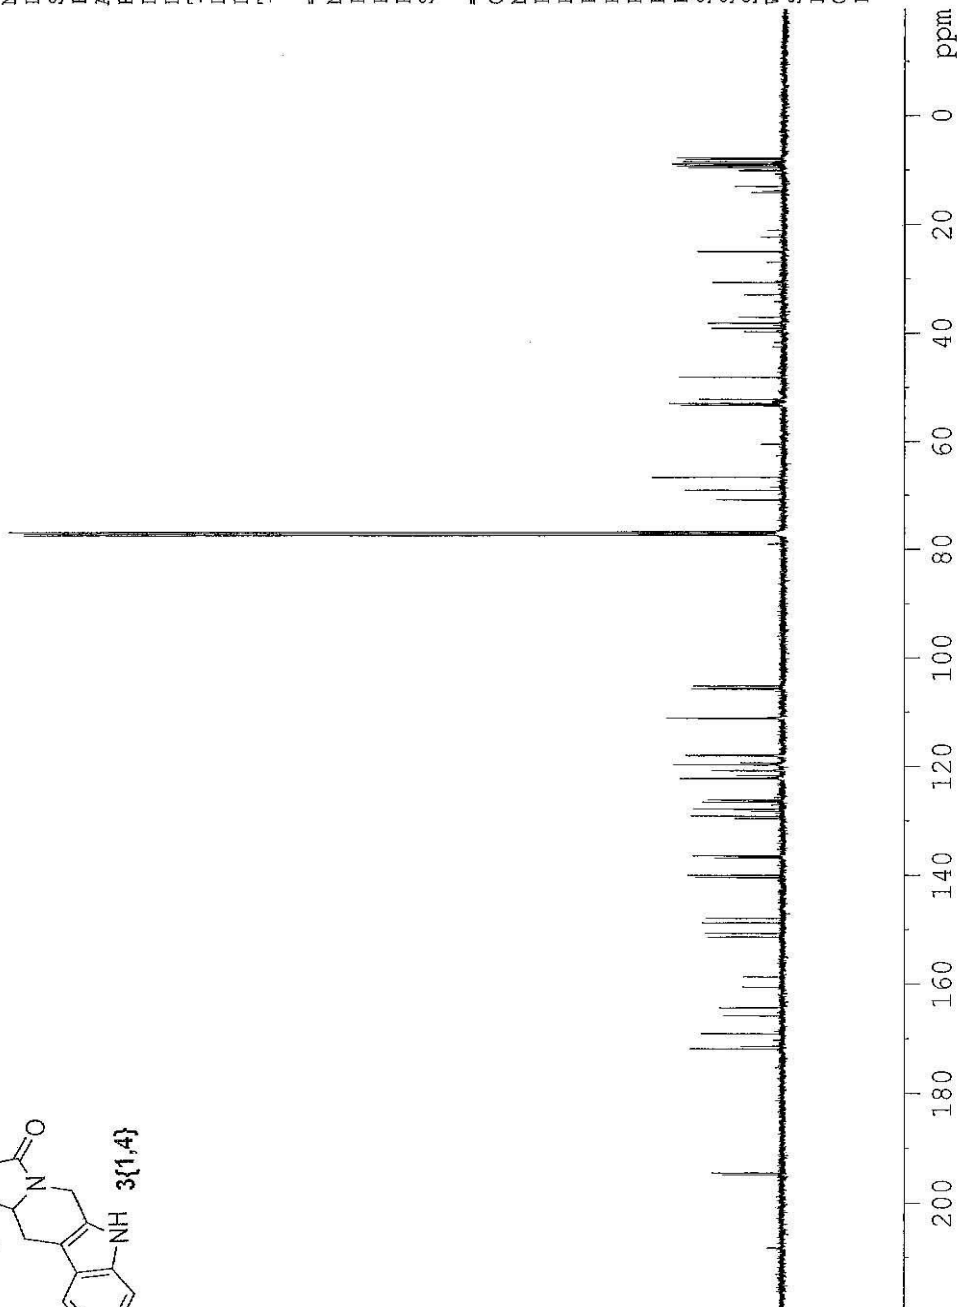

JRG-348-75re\_p  
CDC13, 1H

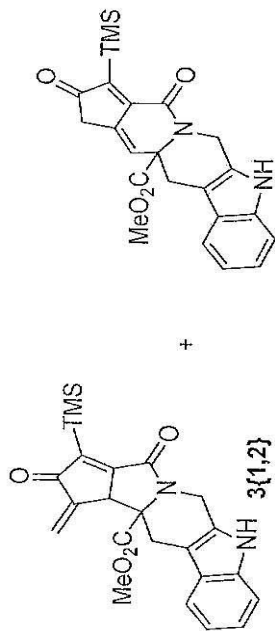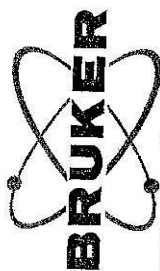

NAME JRG-348-75re  
EXPNO 1  
PROCNO 1  
Date\_ 20110726  
Time\_ 22.06  
INSTRUM spect  
PROBHD 5 mm PABBO BB-  
PULPROG zg30  
TD 65536  
SOLVENT CDC13  
NS 8  
DS 2  
SWH 8223.685 Hz  
FIDRES 0.125483 Hz  
AQ 3.9846387 sec  
RG 80.6  
DW 60.800 usec  
DE 6.50 usec  
TE 294.8 K  
D1 2.0000000 sec  
TD0 1

===== CHANNEL f1 =====  
NUC1 1H  
P1 14.31 usec  
PL1 -1.00 dB  
PL1W 11.09959412 W  
SF01 400.2324716 MHz  
SI 32768  
SF 400.2300000 MHz  
WDW EM  
SSB 0  
LB 0.30 Hz  
GB 0  
PC 1.00

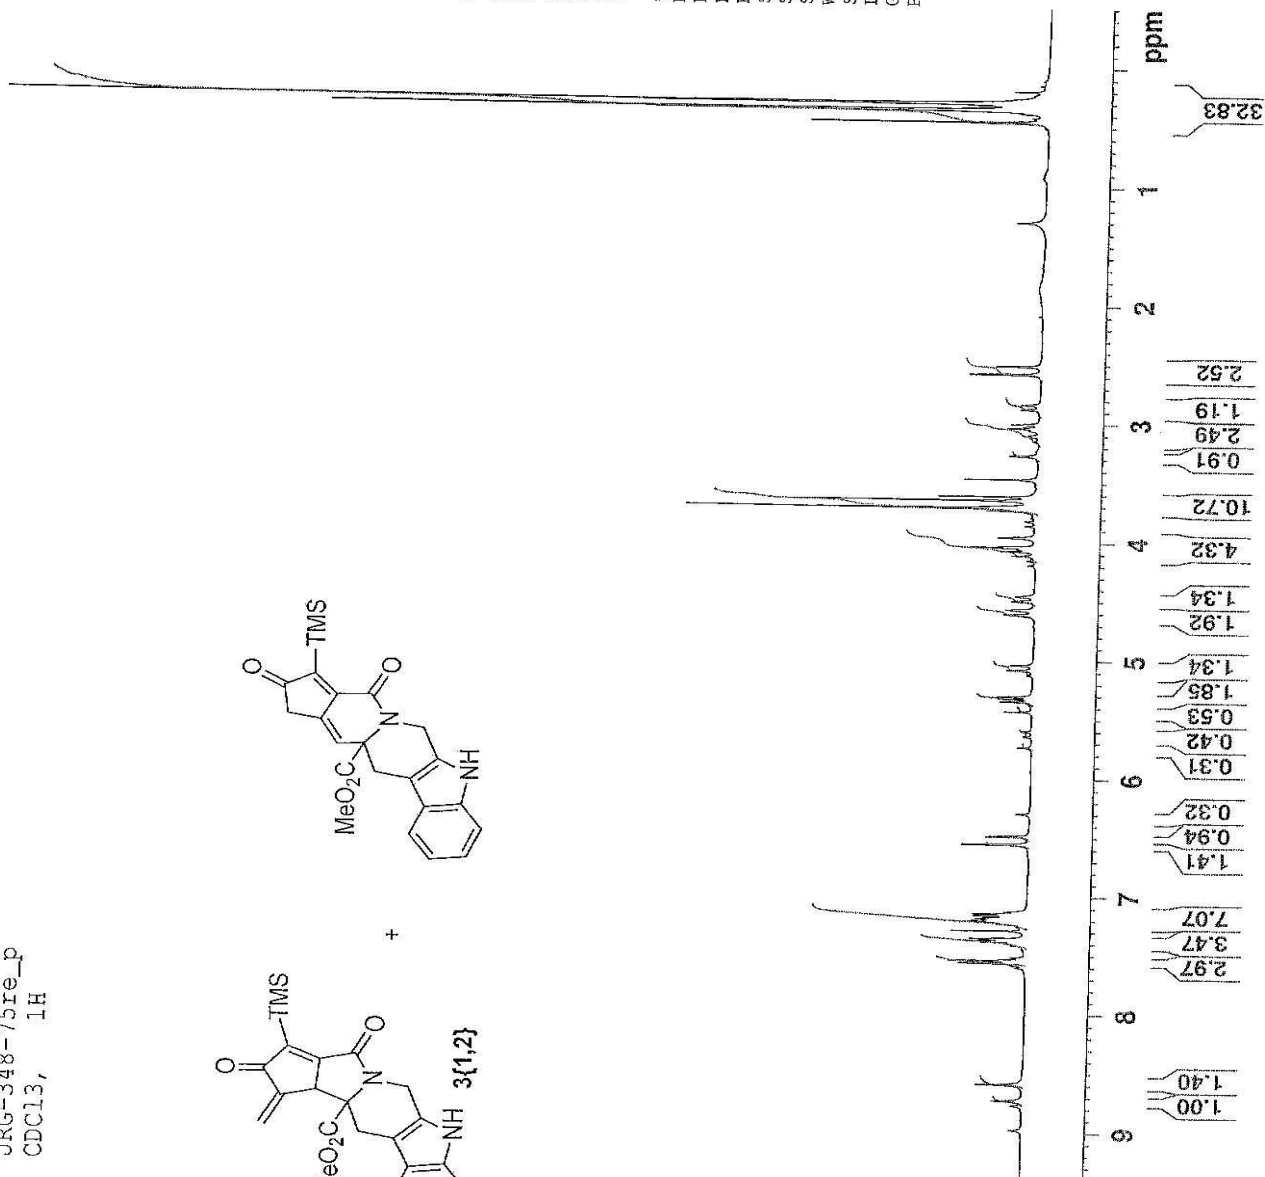

JRG-348-75re\_C  
CDC13

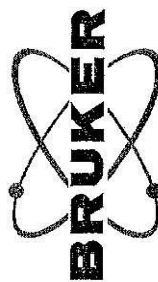

NAME JRG-348-75re  
EXPNO 2  
PROCNO 1  
Date\_ 20110726  
Time 22.39  
INSTRUM spect  
PROBHD 5 mm PABBO BB-  
PULPROG zgpg30  
TD 65536  
SOLVENT CDCl3  
NS 507  
DS 4  
SWH 24038.461 Hz  
FIDRES 0.366798 Hz  
AQ 1.3631988 sec  
RG 203  
DW 20.800 usec  
DE 6.50 usec  
TE 295.6 K  
D1 3.0000000 sec  
D11 0.0300000 sec  
TD0 1

===== CHANNEL f1 =====  
NUC1 13C  
P1 10.00 usec  
PL1 -1.59 dB  
PL1W 51.07626343 W  
SFO1 100.6479773 MHz

===== CHANNEL f2 =====  
CPDPRG2 waltz16  
NUC2 1H  
PCPD2 75.00 usec  
PL2 -1.00 dB  
PL12 13.39 dB  
PL13 20.00 dB  
PL2W 11.09959412 W  
PL12W 0.40393090 W  
PL13W 0.08816721 W  
SFO2 400.2316009 MHz  
SI 32768  
WDW EM  
SSB 0  
LB 1.00 Hz  
GB 0  
PC 1.40

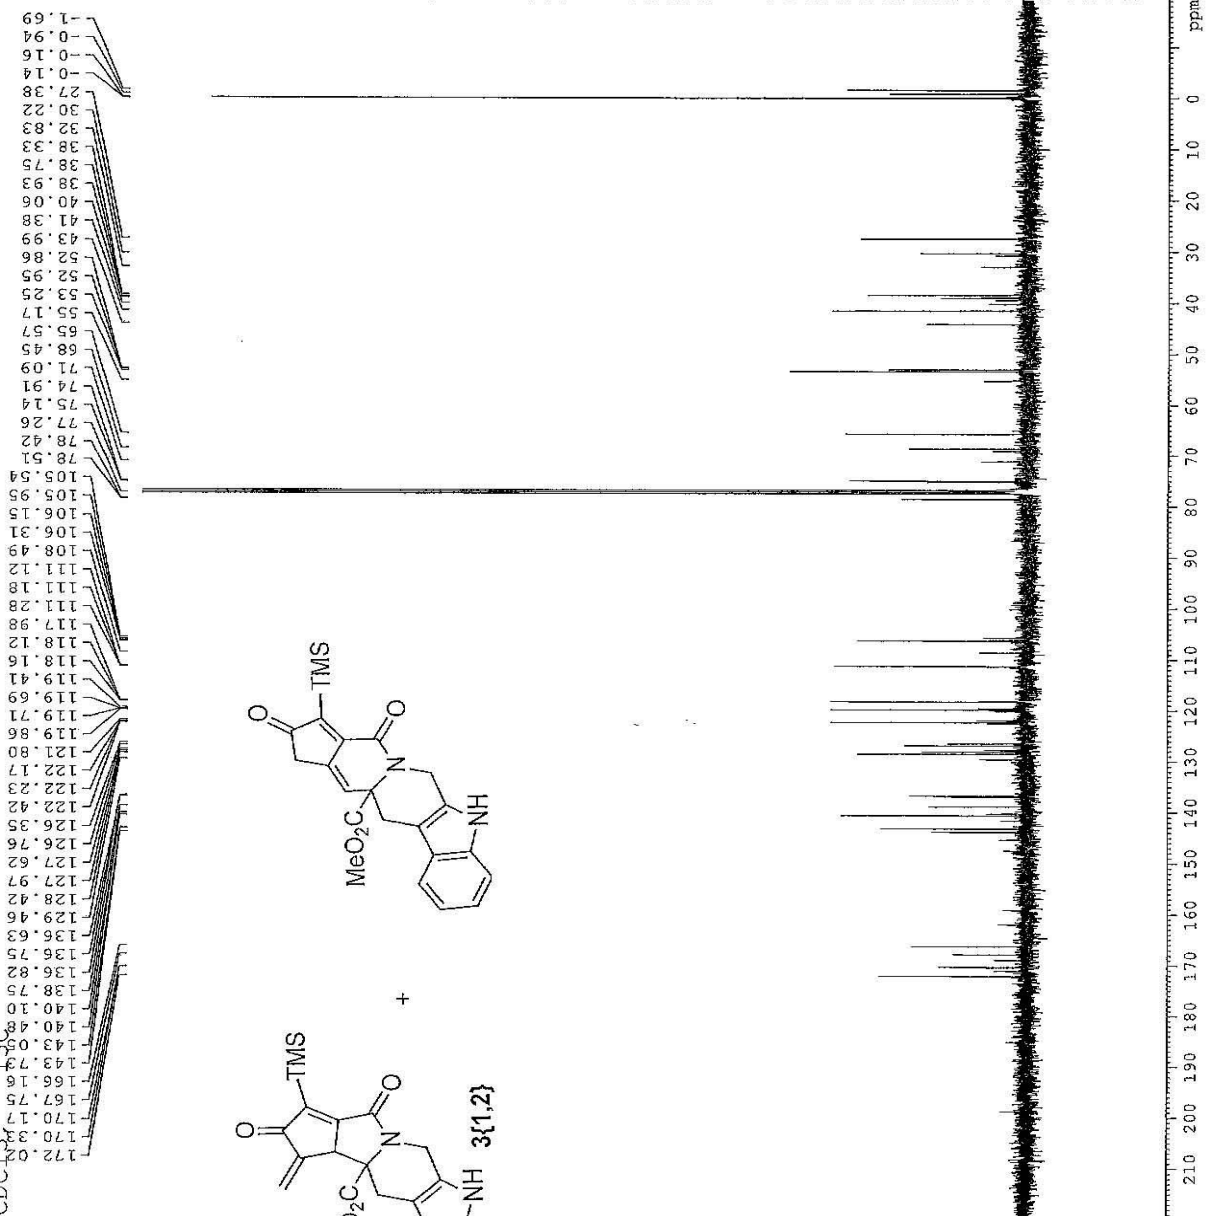

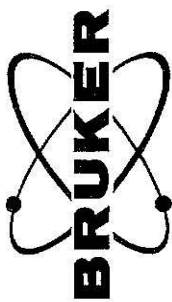

NAME JRG-348-37re  
 EXPNO 1  
 PROCNO 1  
 Date\_ 20110726  
 Time 22.52  
 INSTRUM spect  
 PROBHD 5 mm PABBO BB-  
 PULPROG zg30  
 TD 65536  
 SOLVENT CDCl3  
 NS 8  
 DS 2  
 SWH 8223.685 Hz  
 FIDRES 0.125483 Hz  
 AQ 3.9846387 sec  
 RG 80.6  
 DW 60.800 usec  
 DE 6.50 usec  
 TE 295.1 K  
 D1 2.00000000 sec  
 TD0 1

===== CHANNEL f1 =====  
 NUC1 1H  
 P1 14.31 usec  
 PL1 -1.00 dB  
 PL1W 11.09959412 W  
 SF01 400.2324716 MHz  
 SI 32768  
 SF 400.2300000 MHz  
 WDW EM  
 SSB 0  
 LB 0.30 Hz  
 GB 0  
 PC 1.00

8.650  
8.523  
7.562  
7.432  
7.413  
7.347  
7.332  
7.311  
7.291  
7.221  
7.202  
7.199  
7.193  
7.190  
7.182  
7.174  
7.172  
7.164  
7.127  
7.125  
7.107  
6.497  
6.492  
6.367  
6.362  
5.971  
5.969  
5.767  
5.764  
5.326  
5.320  
4.167  
4.149  
3.996  
3.990  
3.985  
3.781  
3.444  
3.341  
3.302  
2.198  
2.190  
2.163  
2.156

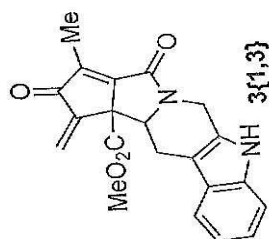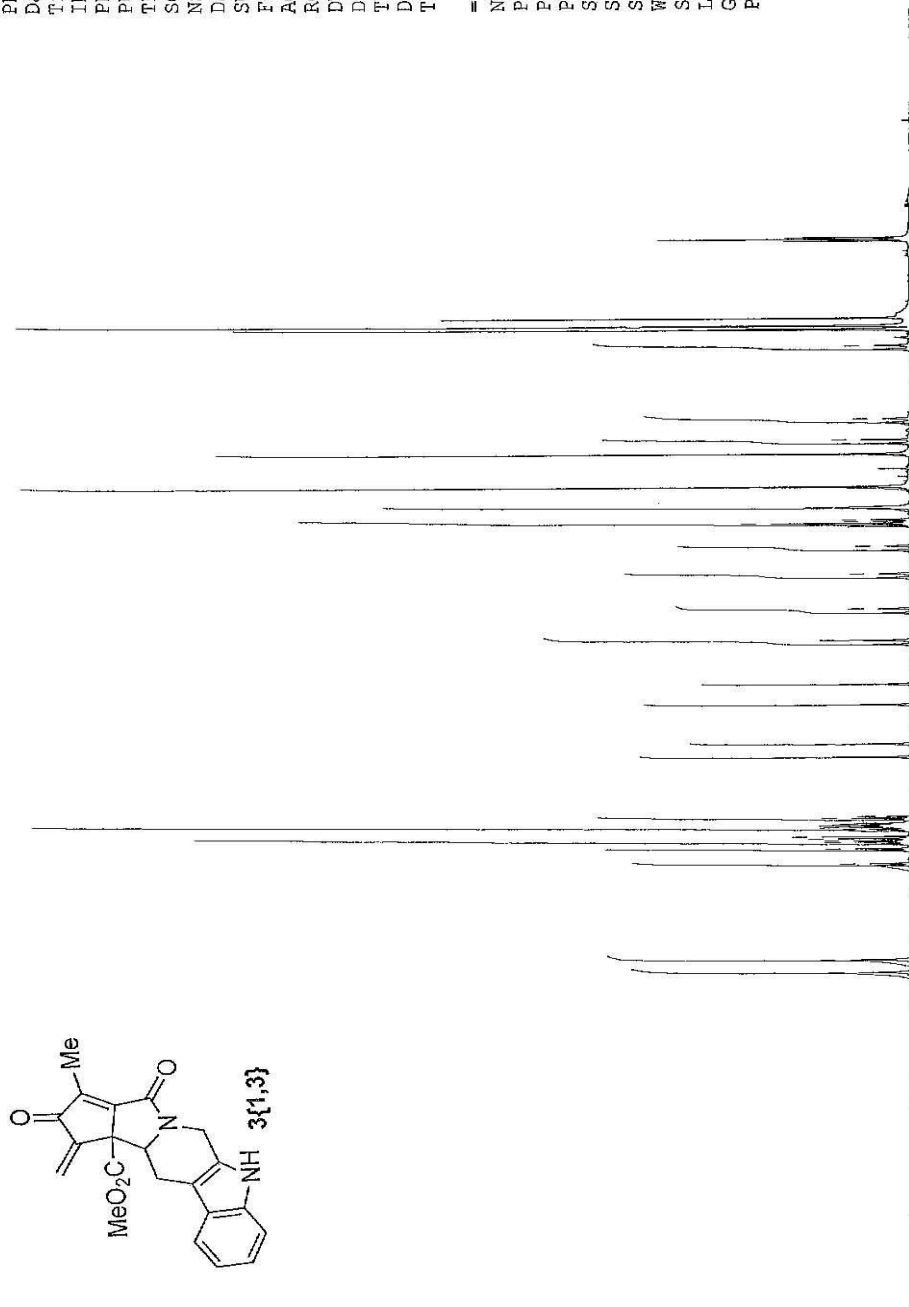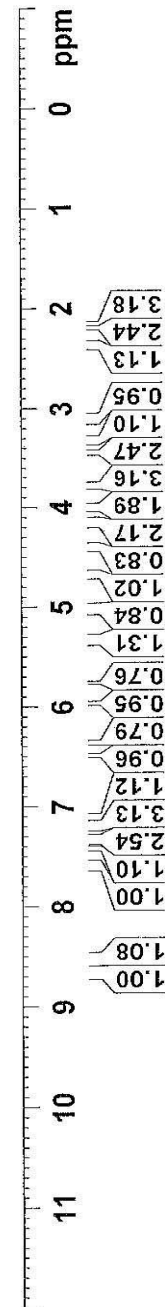

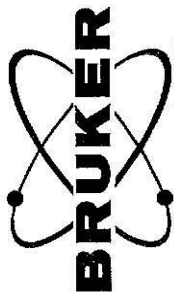

JRG-348-37re

NAME

EXPNO 2

PROCNO 1

Date\_ 20110726

Time 23.13

INSTRUM spect

PROBHD 5 mm PABBO BB-

PULPROG zgpg30

TD 65536

SOLVENT CDCl3

NS 252

DS 4

SWH 24038.461 Hz

FIDRES 0.366798 Hz

AQ 1.3631988 sec

RG 203

DW 20.800 usec

DE 6.50 usec

TE 295.6 K

D1 3.0000000 sec

D11 0.0300000 sec

TD0 1

==== CHANNEL f1 =====

NUC1 13C

P1 10.00 usec

PL1 -1.59 dB

PL1W 51.07626343 W

SFO1 100.6479773 MHz

==== CHANNEL f2 =====

CPDPRG2 waltz16

NUC2 1H

PCPD2 75.00 usec

PL2 -1.00 dB

PL12 13.39 dB

PL13 20.00 dB

PL2W 11.09959412 W

PL12W 0.40393090 W

PL13W 0.08816721 W

SFO2 400.2316009 MHz

SI 32768

SF 100.6379241 MHz

WDW EM

SSB 0

LB 1.00 Hz

GB 0

PC 1.40

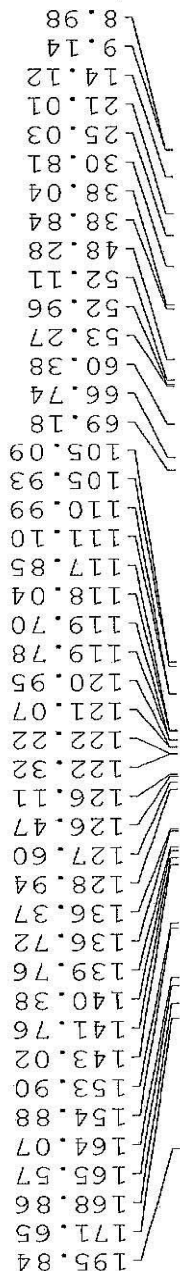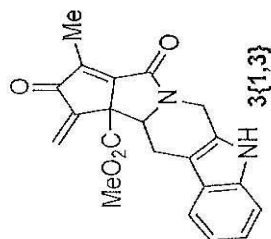



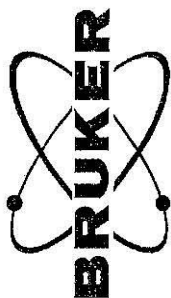

NAME JRG-348-21  
EXPNO 1  
PROCNO 1  
Date\_ 20110609  
Time\_ 16.57  
INSTRUM spect  
PROBHD 5 mm Multinucl  
PULPROG zg30  
TD 32768  
SOLVENT CDCl3  
NS 16  
DS 2  
SWH 6188.119 Hz  
FIDRES 0.188846 Hz  
AQ 2.6477044 sec  
RG 128  
DW 80.800 usec  
DE 6.50 usec  
TE 297.4 K  
D1 1.00000000 sec  
TDO 1

===== CHANNEL f1 =====  
NUC1 1H  
P1 13.20 usec  
PL1 -2.00 dB  
PL1W 18.20942116 W  
SFO1 300.2318540 MHz  
SI 32768  
SF 300.2300000 MHz  
WDW EM  
SSB 0  
LB 0.10 Hz  
GB 0  
PC 1.00

8.296  
7.695  
7.669  
7.376  
7.349  
7.289  
7.205  
7.202  
7.180  
7.175  
7.164  
7.160  
7.138  
7.092  
7.085  
5.651  
5.629  
5.607  
4.983  
4.961  
3.705  
3.502  
3.455  
3.183  
3.136  
1.912

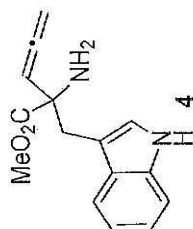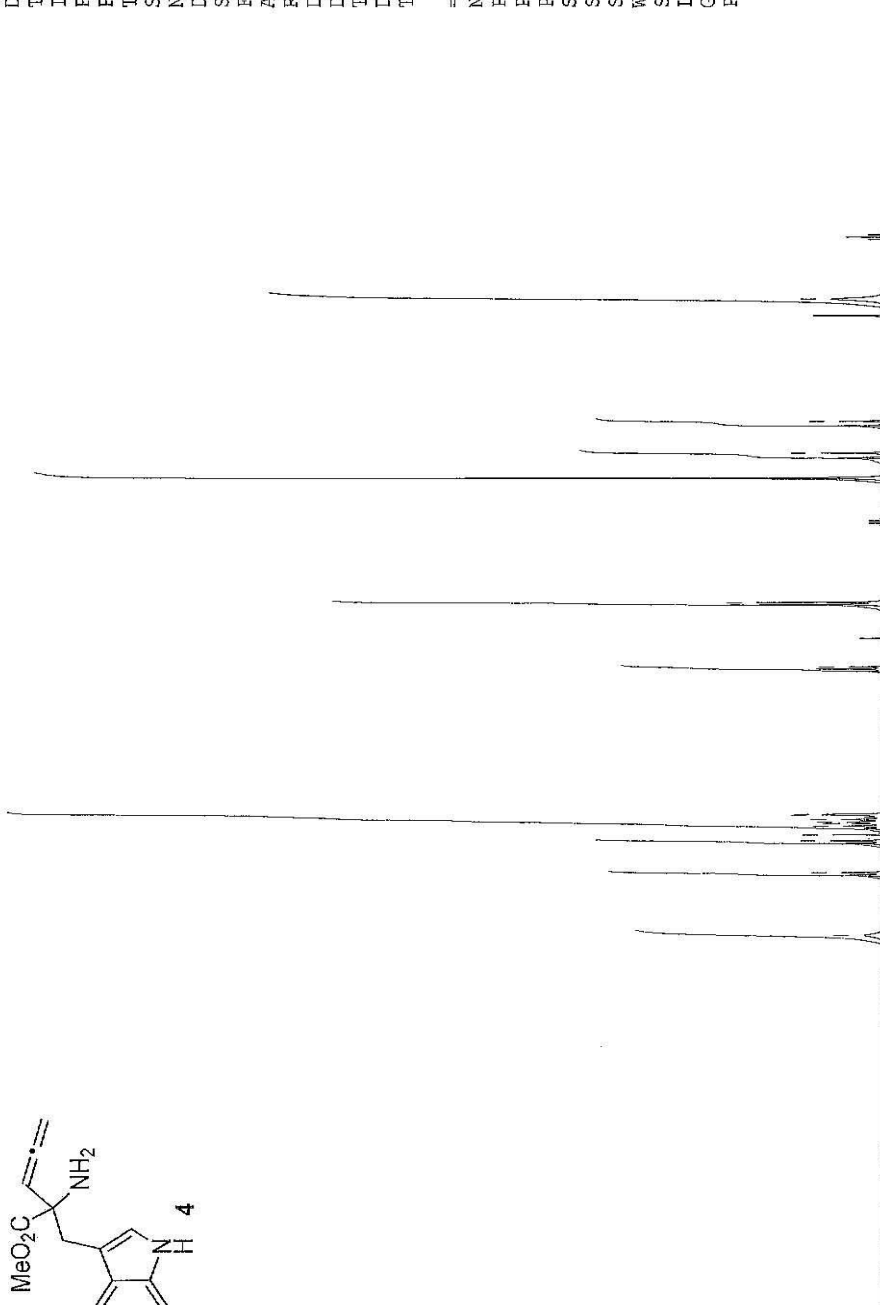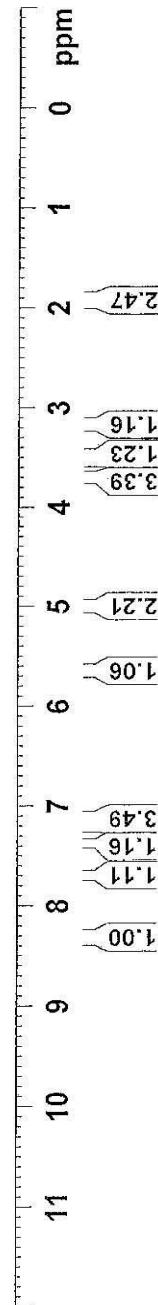

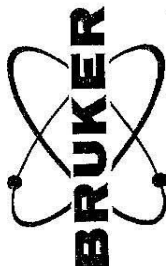

NAME JRG-348-21\_carbon  
 EXPNO 1  
 PROCNO 1  
 Date 20110715  
 Time 9.23  
 INSTRUM spect  
 PROBD 5 mm PABBO BB-  
 PULPROG zgpg30  
 TD 65536  
 SOLVENT CDCl3  
 NS 128  
 DS 4  
 SWH 24038.461 Hz  
 FIDRES 0.366798 Hz  
 AQ 1.3631988 sec  
 RG 203  
 DW 20.800 usec  
 DE 6.50 usec  
 TE 295.7 K  
 D1 3.00000000 sec  
 D11 0.03000000 sec  
 TD0 1

==== CHANNEL f1 =====  
 NUC1 13C  
 P1 10.00 usec  
 PL1 -1.59 dB  
 PL1W 51.07626343 W  
 SFO1 100.6479773 MHz

==== CHANNEL f2 =====  
 CPDPRG2 waltz16  
 NUC2 1H  
 PCPD2 75.00 usec  
 PL2 -1.00 dB  
 PL12 13.39 dB  
 PL13 20.00 dB  
 PL1W 11.09959412 W  
 PL12W 0.40393090 W  
 PL13W 0.08816721 W  
 SFO2 400.2316009 MHz  
 SI 32768  
 SF 100.6379297 MHz  
 WDW EM  
 SSB 0  
 LB 1.00 Hz  
 GB 0  
 PC 1.40

— 35.59  
 — 52.32  
 — 60.97  
 — 79.41  
 — 96.32  
 109.64  
 111.06  
 119.04  
 119.35  
 121.80  
 123.65  
 127.89  
 135.87

— 175.46  
 — 206.36

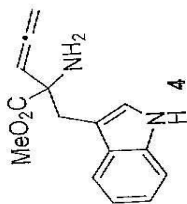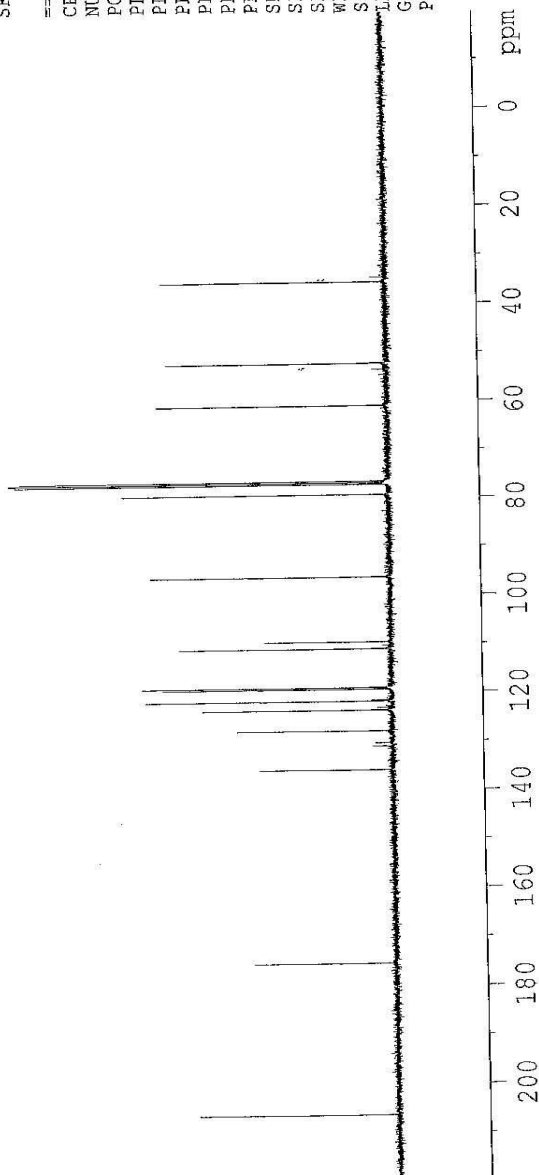

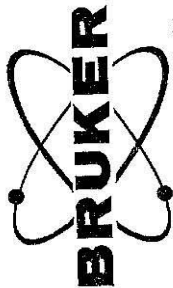

JRG-329-81  
NAME  
EXPNO 1  
PROCNO 1  
Date\_ 20110429  
Time\_ 10.36  
INSTRUM spect  
PROBHD 5 mm Multinucl  
PULPROG zg30  
TD 32768  
SOLVENT CDCl3  
NS 16  
DS 2  
SWH 6188.119 Hz  
FIDRES 0.188846 Hz  
AQ 2.6477044 sec  
RG 128  
DW 80.800 usec  
DE 6.50 usec  
TE 294.2 K  
D1 1.00000000 sec  
TD0 1

==== CHANNEL f1 =====  
NUC1 1H  
P1 13.20 usec  
PL1 -2.00 dB  
PL1W 18.20942116 W  
SFO1 300.2318540 MHz  
SI 32768  
SF 300.2300000 MHz  
WDW EM  
SSB 0  
LB 0.10 Hz  
GB 0  
PC 1.00

7.896  
7.830  
7.507  
7.314  
7.290  
7.191  
7.171  
7.167  
7.148  
7.142  
7.122  
7.119  
5.435  
5.413  
5.391  
5.027  
5.004  
4.989  
4.967  
4.941  
4.920  
4.904  
4.266  
4.214  
4.166  
4.142  
4.090  
3.728  
3.512  
3.506  
3.486  
3.465  
3.446  
3.415  
3.364  
3.061  
2.507

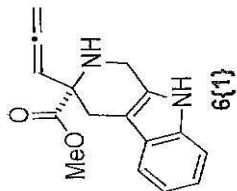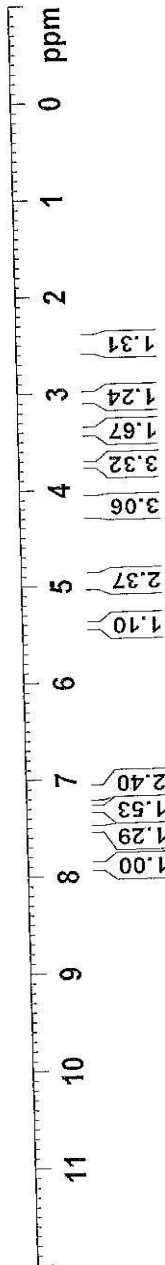

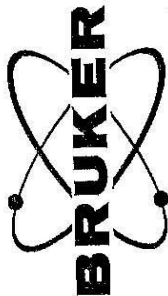

JRG-348-25\_carbon

NAME  
EXPNO 1  
PROCNO 1  
Date\_ 20110715  
Time 9.48  
INSTRUM spect  
PROBHD 5 mm PABBO BB-  
PULPROG zgpg30  
TD 65536  
SOLVENT CDCl3  
NS 248  
DS 4  
SWH 24038.461 Hz  
FIDRES 0.366798 Hz  
AQ 1.3631988 sec  
RG 203  
DW 20.800 usec  
DE 6.50 usec  
TE 295.8 K  
D1 3.00000000 sec  
D11 0.03000000 sec  
TD0 1

==== CHANNEL f1 =====  
NUC1 13C  
P1 10.00 usec  
PL1 -1.59 dB  
PL1W 51.07626343 W  
SFO1 100.6479773 MHz

==== CHANNEL f2 =====  
CPDPRG2 waltz16  
NUC2 1H  
PCPD2 75.00 usec  
PL2 -1.00 dB  
PL12 13.39 dB  
PL13 20.00 dB  
PL2W 11.09959412 W  
PL12W 0.40393090 W  
PL13W 0.08816721 W  
SFO2 400.2316009 MHz  
SI 32768  
SF 100.6379253 MHz  
WDW EM  
SSB 0  
LB 1.00 Hz  
GB 0  
PC 1.40

136.19  
130.91  
127.16  
121.41  
119.17  
117.77  
110.68  
106.63  
94.03  
79.30  
60.55  
52.48  
39.80  
29.67

207.24  
173.88

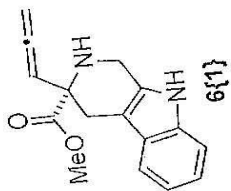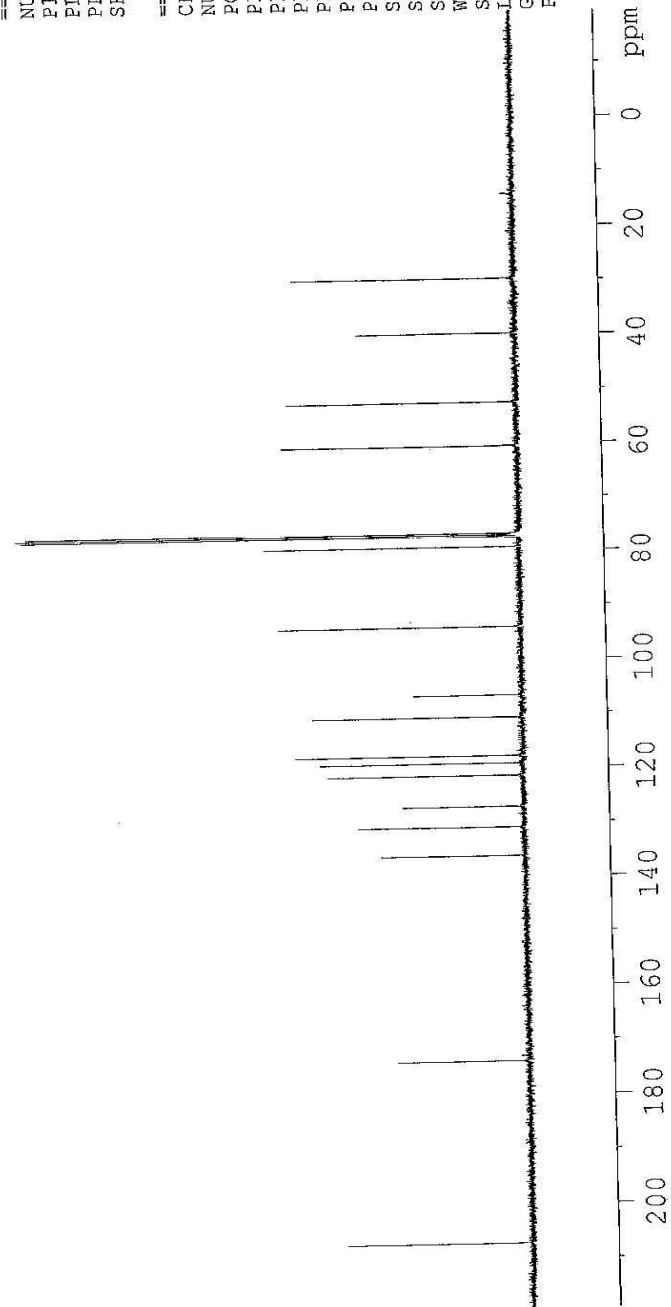

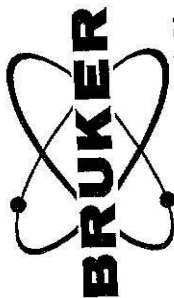

NAME JRG-329-79  
 EXPNO 1  
 PROCNO 1  
 Date 20110429  
 Time 10.47  
 INSTRUM spect  
 PROBD 5 mm Multinucl  
 PULPROG zg30  
 TD 32768  
 SOLVENT CDCl3  
 NS 16  
 DS 2  
 SWH 6188.119 Hz  
 FIDRES 0.188846 Hz  
 AQ 2.6477044 sec  
 RG 57  
 DE 80.800 usec  
 TE 6.50 usec  
 D1 294.4 K  
 TD0 1.00000000 sec  
 1

CHANNEL f1 =====  
 NUC1 1H  
 P1 13.20 usec  
 PL1 -2.00 dB  
 PL1W 18.20942116 W  
 SF01 300.2318540 MHz  
 SI 32768  
 SF 300.2300000 MHz  
 WDW EM  
 SSB 0  
 LB 0.10 Hz  
 GB 0  
 PC 1.00

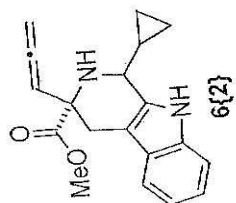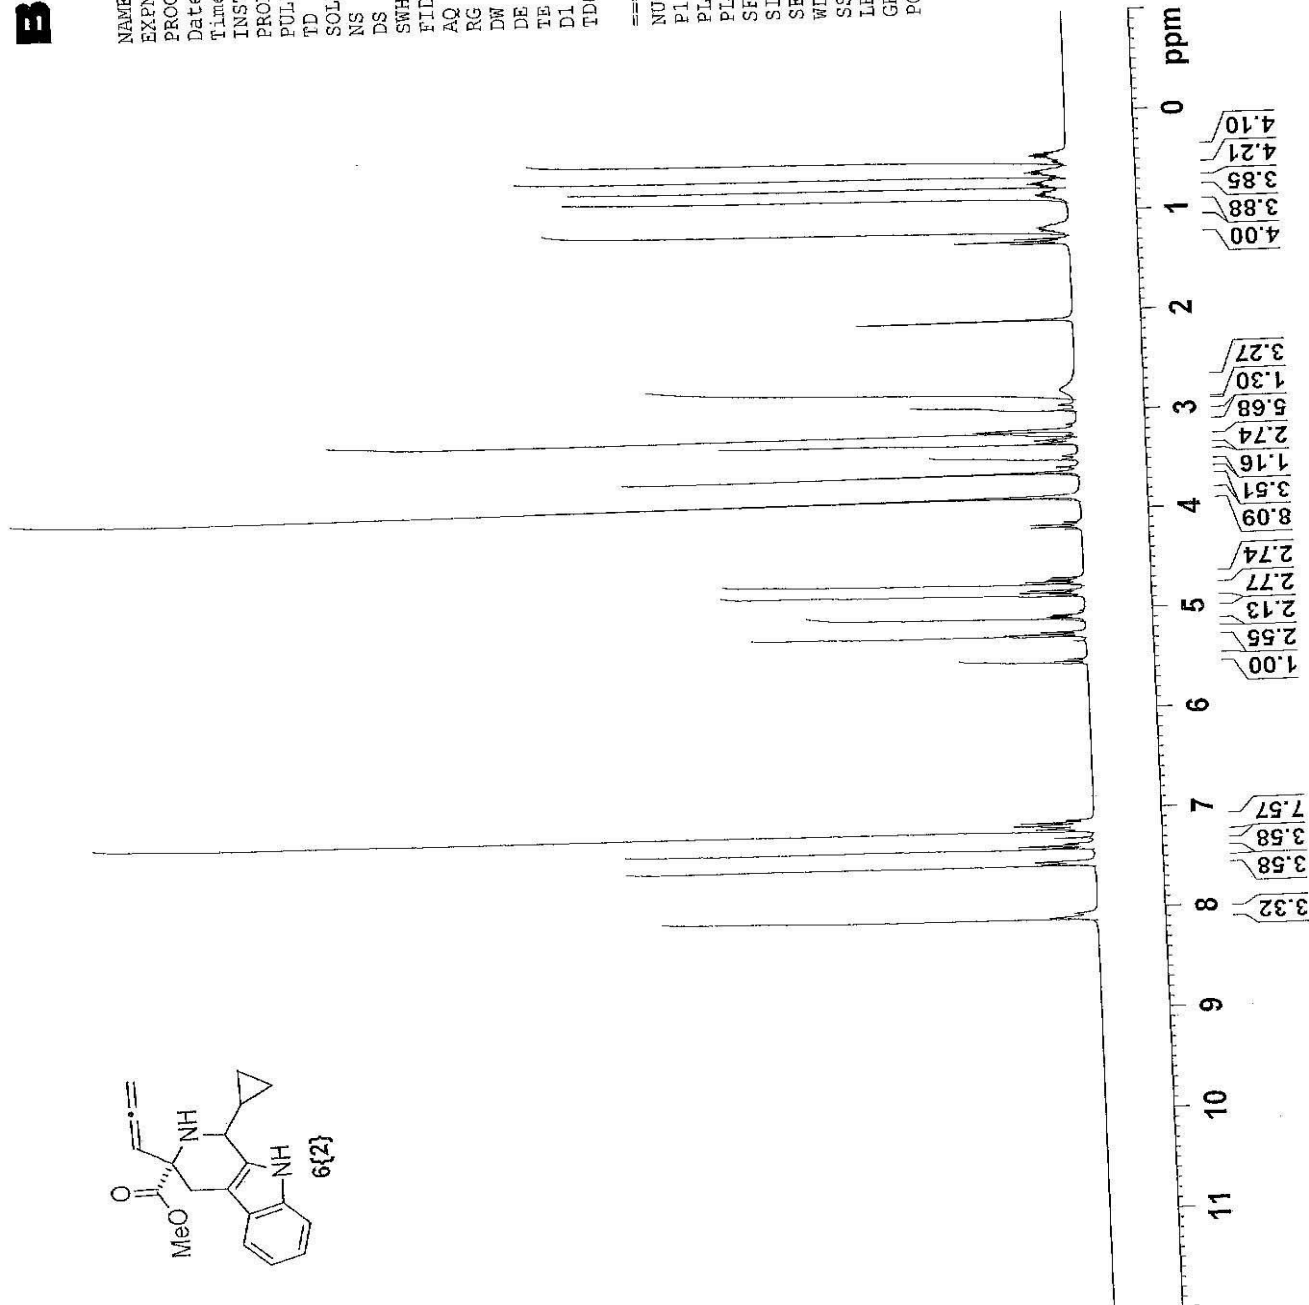

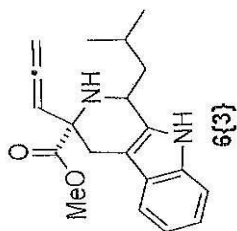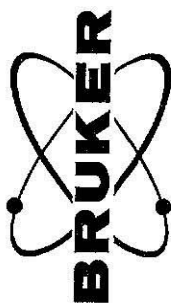

NAME JRG-329-80  
 EXPNO 1  
 PROCNO 1  
 Date 20110429  
 Time 15.20  
 INSTRUM spect  
 PROBHD 5 mm Multinucl  
 PULPROG zg30  
 TD 32768  
 SOLVENT CDCl3  
 NS 16  
 DS 2  
 SWH 6188.119 Hz  
 FIDRES 0.188846 Hz  
 AQ 2.6477044 sec  
 RG 57  
 DW 80.800 usec  
 DE 6.50 usec  
 TE 294.3 K  
 D1 1.00000000 sec  
 TD0 1

===== CHANNEL f1 =====  
 NUC1 1H  
 P1 13.20 usec  
 PL1 -2.00 dB  
 PL1W 18.20942116 W  
 SF01 300.2318540 MHz  
 SI 32768  
 SF 300.2300000 MHz  
 WDW EM  
 SSB 0  
 LB 0.10 Hz  
 GB 0  
 PC 1.00

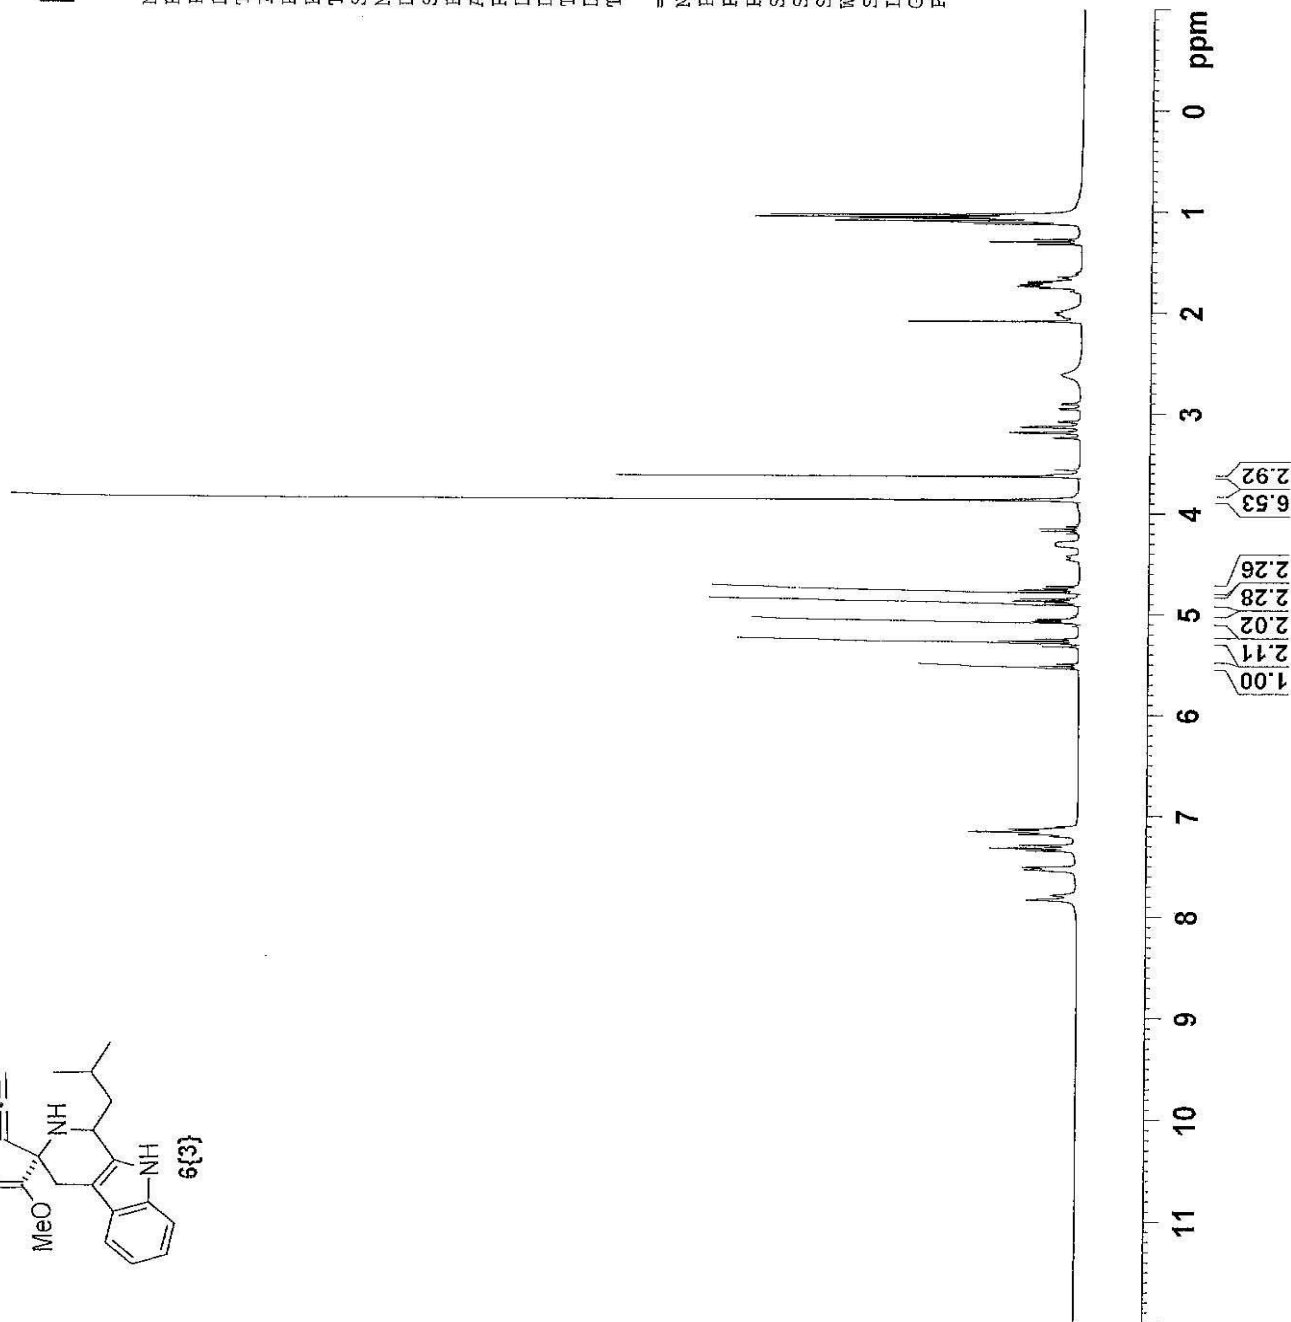

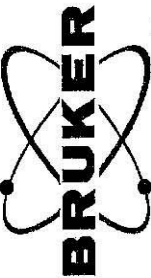

JRG-329-80  
CDCl<sub>3</sub>, 1H

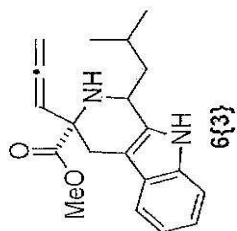

NAME JRG-329-80  
EXPNO 1  
PROCNO 1  
Date\_ 20110429  
Time 15.20  
INSTRUM spect  
PROBHD 5 mm Multinucl  
PULPROG zg30  
TD 32768  
SOLVENT CDCl<sub>3</sub>  
NS 16  
DS 2  
SWH 6188.119 Hz  
FIDRES 0.188846 Hz  
AQ 2.6477044 sec  
RG 57  
DW 80.800 usec  
DE 6.50 usec  
TE 294.3 K  
D1 1.00000000 sec  
TD0 1

===== CHANNEL f1 =====  
NUC1 1H  
P1 13.20 usec  
PL1 -2.00 dB  
PL1W 18.20942116 W  
SFO1 300.2318540 MHz  
SI 32768  
SF 300.2300000 MHz  
WDW EM  
SSB 0  
LB 0.10 Hz  
GB 0  
PC 1.00

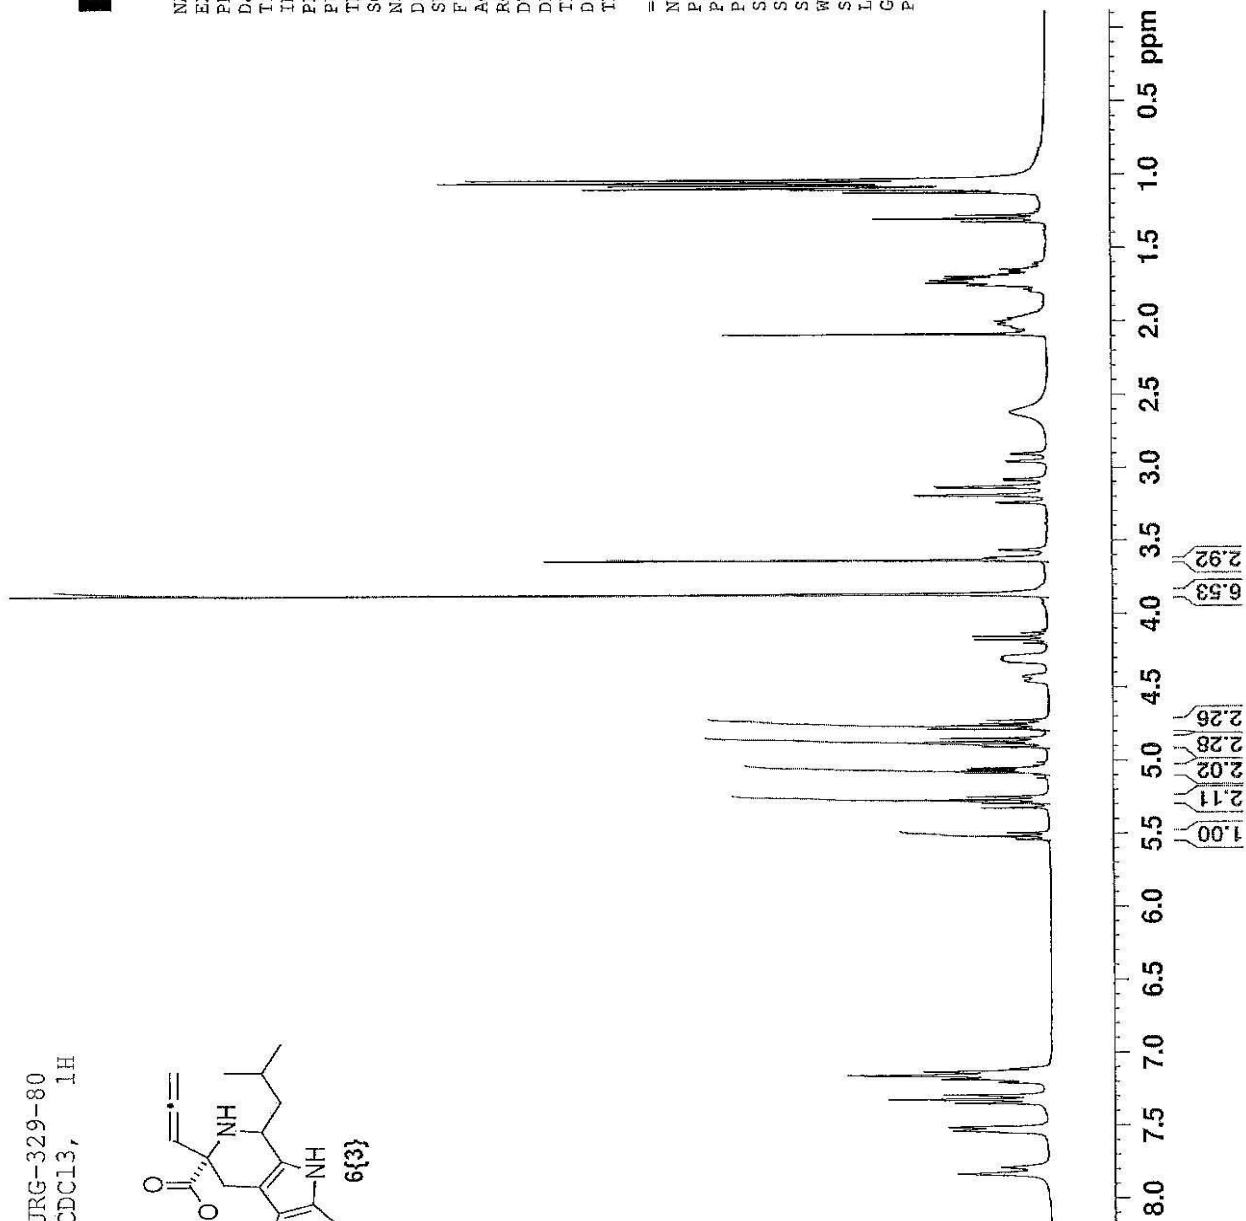

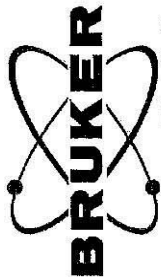

NAME JRG-348-40  
 EXPNO 1  
 PROCNO 1  
 Date\_ 20110629  
 Time 8.41  
 INSTRUM spect  
 PROBD 5 mm Dual 13C/  
 PULPROG zg30  
 ID 32768  
 SOLVENT CDCl3  
 NS 8  
 DS 2  
 SWH 6172.839 Hz  
 FIDRES 0.188360 Hz  
 AQ 2.6542580 sec  
 RG 322.5  
 DW 81.000 usec  
 DE 6.50 usec  
 TE 294.2 K  
 D1 1.00000000 sec  
 TD0 1

===== CHANNEL f1 =====  
 NUC1 1H  
 P1 6.20 usec  
 PL1 4.00 dB  
 SF01 300.1418535 MHz  
 SI 32768  
 SF 300.1400000 MHz  
 WDW EM  
 SSB 0  
 LB 0.30 Hz  
 GB 0  
 PC 1.00

JRG-348-40  
 CDCl3, 1H

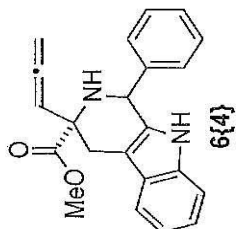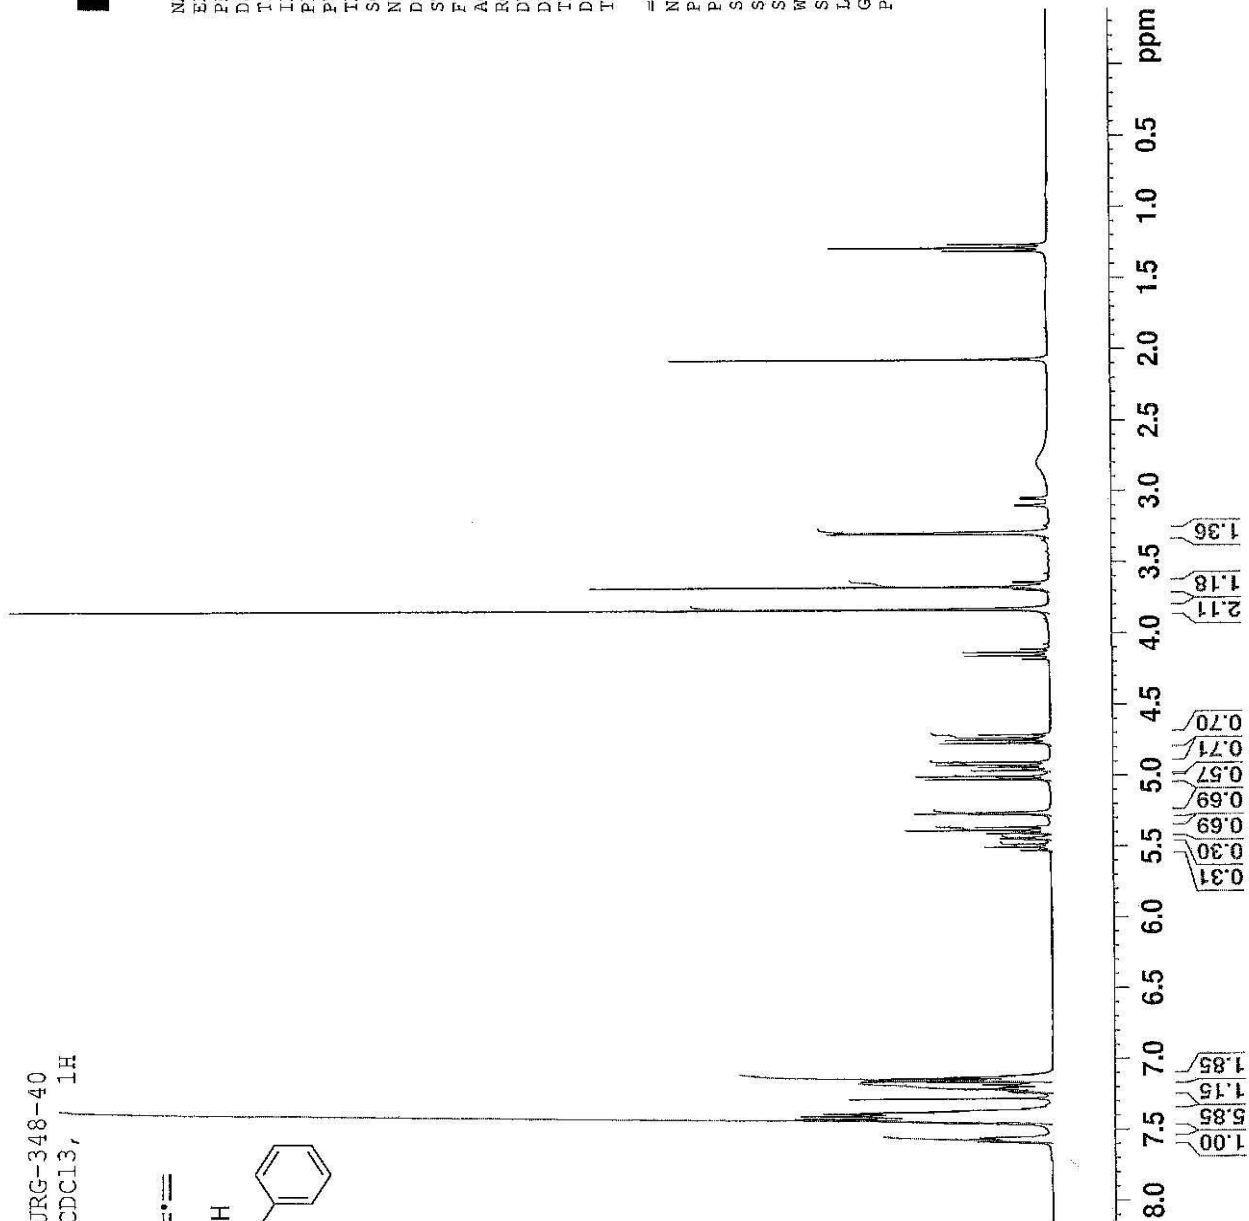



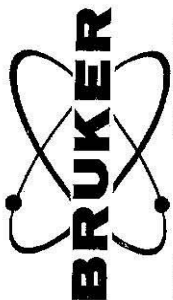

JRG-329-16

NAME

EXPNO

PROCNO

Date

Time

INSTRUM

PROBHD

PULPROG

TD

SOLVENT

NS

DS

SWH

FIDRES

AQ

RG

DW

DE

TE

D1

TD0

1

1

20110203

16.28

spect

5 mm PABCO BB-

zg30

65536

CDC13

10

2

8223.685 Hz

0.125483 Hz

3.9846387 sec

114

60.800 usec

6.50 usec

295.5 K

2.00000000 sec

1

===== CHANNEL f1 =====

NUC1

1H

P1

14.31 usec

PL1

-1.00 dB

PL1W

11.09959412 W

SF01

400.2324716 MHz

SI

32768

SF

400.2300000 MHz

WDW

EM

SSB

0

LB

0.30 Hz

GB

0

PC

1.00

1.296  
1.314  
1.314  
3.282  
3.288  
3.288  
3.291  
3.296  
3.675  
3.797  
3.797  
3.849  
4.728  
4.745  
4.757  
4.773  
4.913  
4.930  
4.958  
5.022  
5.037  
5.039  
5.249  
5.254  
5.259  
5.330  
5.353  
5.370  
5.504  
7.145  
7.149  
7.153  
7.163  
7.168  
7.178  
7.181  
7.235  
7.254  
7.254  
7.343  
7.364  
7.375  
7.382  
7.399  
7.404  
7.564  
7.568  
7.584

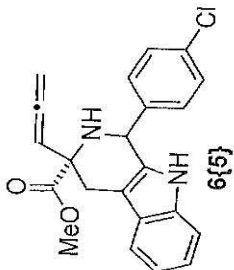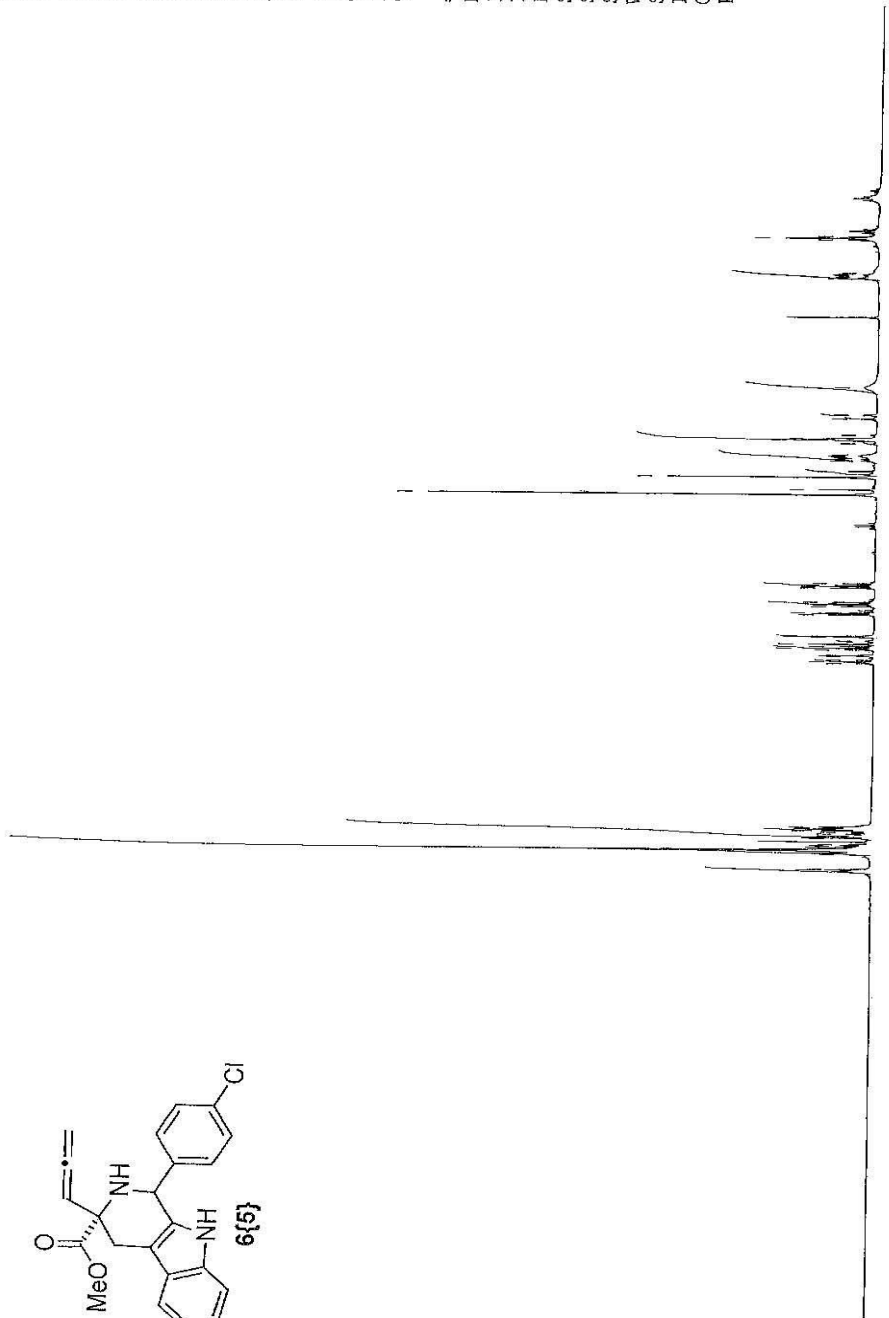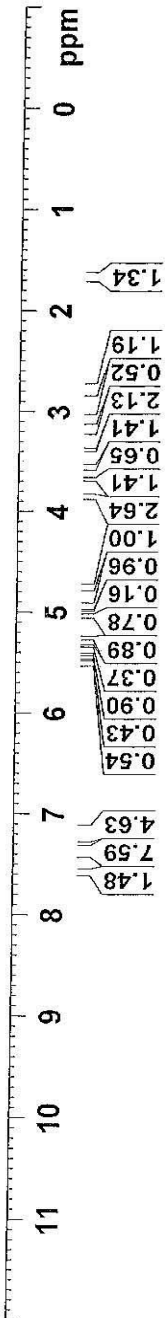

JRG-329-87  
CDCl<sub>3</sub>, 1H

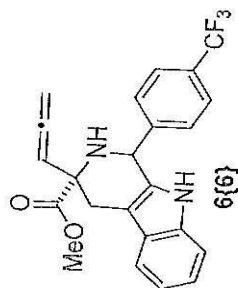

**BRUKER**

NAME JRG-329-87  
EXPNO 1  
PROCNO 1  
Date\_ 20110505  
Time 23.17  
INSTRUM spect  
PROBHD 5 mm Multinucl  
PULPROG zg30  
TD 32768  
SOLVENT CDCl<sub>3</sub>  
NS 16  
DS 2  
SWH 6188.119 Hz  
FIDRES 0.188846 Hz  
AQ 2.6477044 sec  
RG 114  
DW 80.800 usec  
DE 6.50 usec  
TE 293.3 K  
D1 1.0000000 sec  
TD0 1

===== CHANNEL f1 =====  
NUC1 1H  
P1 13.20 usec  
PL1 -2.00 dB  
PL1W 18.20942116 W  
SFO1 300.2318540 MHz  
SI 32768  
SF 300.2300000 MHz  
WDW EM  
SSB 0  
LB 0.10 Hz  
GB 0  
PC 1.00

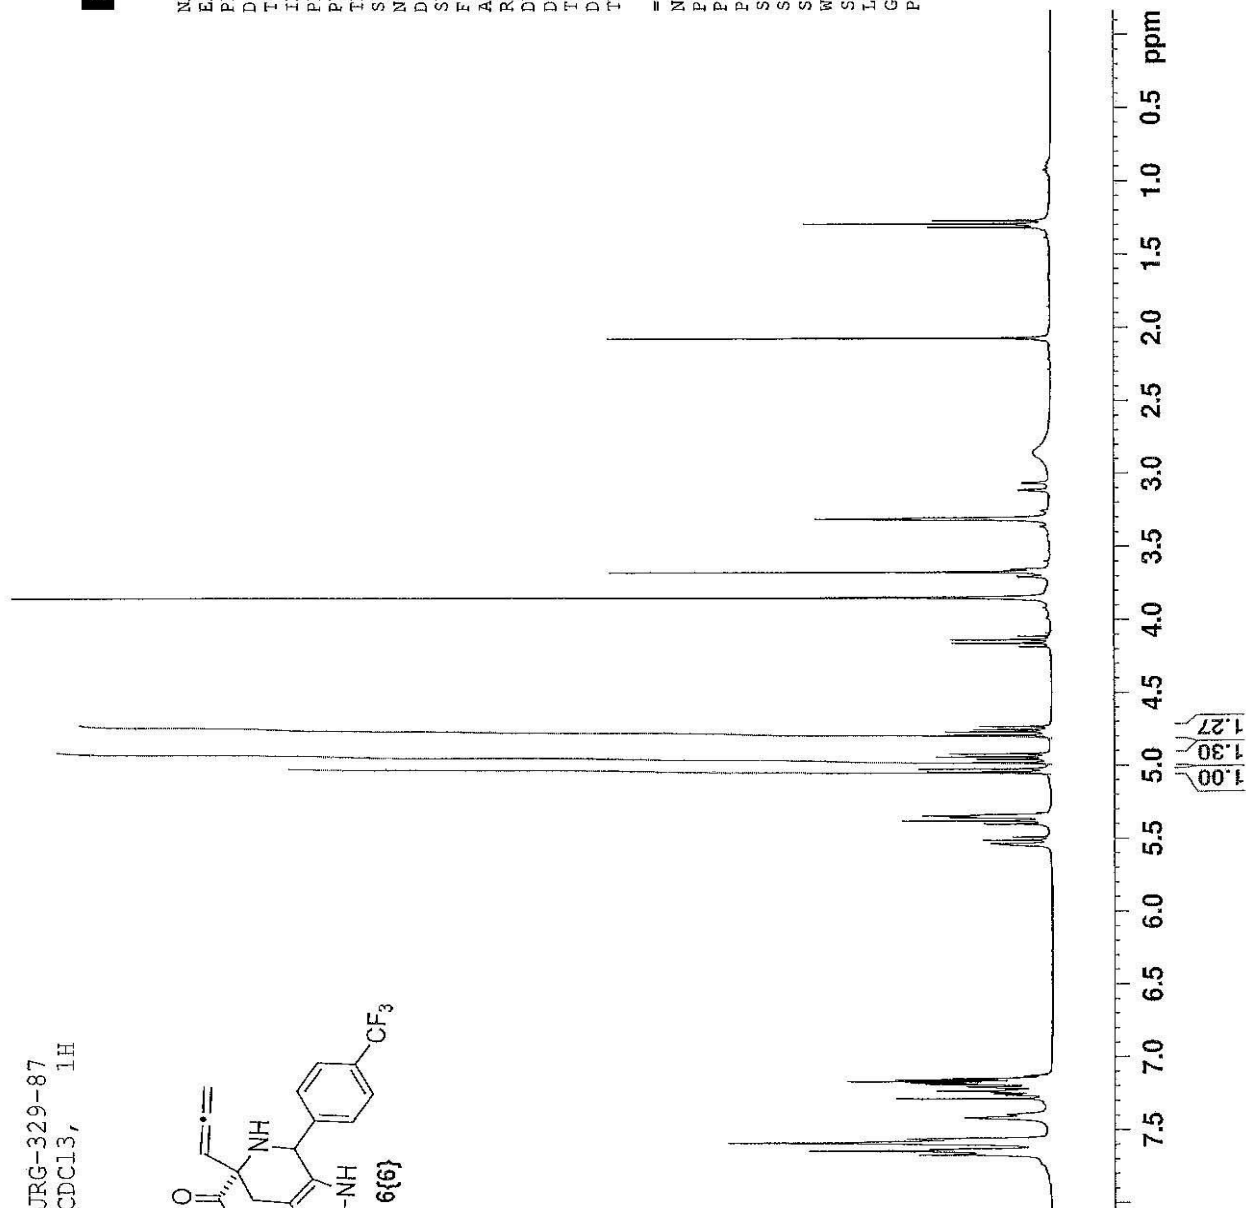

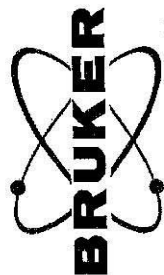

NAME JRG-348-43  
 EXPNO 2  
 PROCNO 1  
 Date\_ 20110629  
 Time 12.23  
 INSTRUM spect  
 PROBD 5 mm Dual 13C/  
 PULPROG zg30  
 TD 32768  
 SOLVENT CDCl3  
 NS 8  
 DS 2  
 SWH 6172.839 Hz  
 FIDRES 0.188380 Hz  
 AQ 2.6542580 sec  
 RG 362  
 DW 81.000 usec  
 DE 6.50 usec  
 TE 295.2 K  
 D1 1.00000000 sec  
 TD0 1

===== CHANNEL f1 =====  
 NUC1 1H  
 P1 6.20 usec  
 PL1 4.00 dB  
 SF01 300.1418535 MHz  
 SI 32768  
 SF 300.1400000 MHz  
 WDW EM  
 SSB 0  
 LB 0.30 Hz  
 GB 0  
 PC 1.00

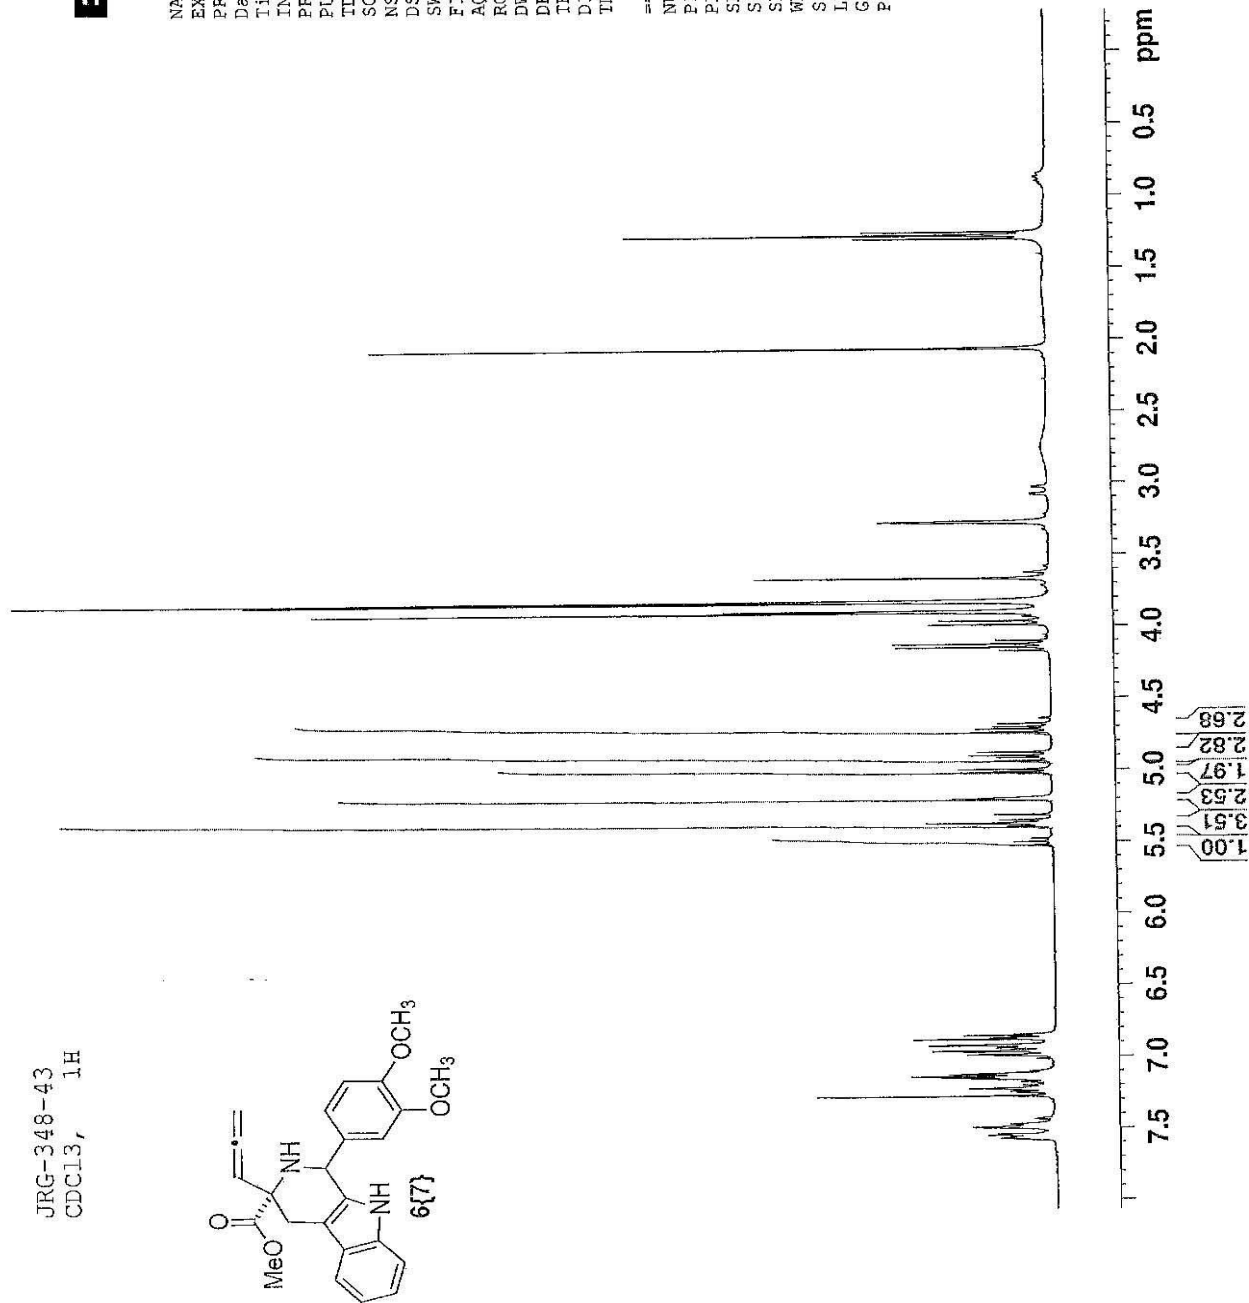

JRG-348-41  
CDCl<sub>3</sub>, 1H

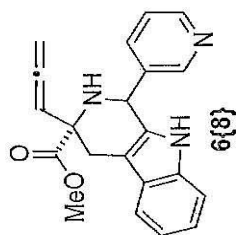

**BRUKER**

JRG-348-41

NAME  
EXPNO 1  
PROCNO 1  
Date 20110629  
Time 8.48  
INSTRUM spect  
PROBHD 5 mm Dual 13C/  
PULPROG zg30  
TD 32768  
SOLVENT CDCl<sub>3</sub>  
NS 8  
DS 2  
SWH 6172.839 Hz  
FIDRES 0.168380 Hz  
AQ 2.6542580 sec  
RG 362  
DW 81.000 usec  
DE 6.50 usec  
TE 294.2 K  
D1 1.00000000 sec  
TD0 1

===== CHANNEL f1 =====  
NUC1 1H  
P1 6.20 usec  
PL1 4.00 dB  
SF01 300.1418535 MHz  
SI 32768  
SF 300.1400000 MHz  
WDW EM  
SSB 0  
LB 0.30 Hz  
GB 0  
PC 1.00

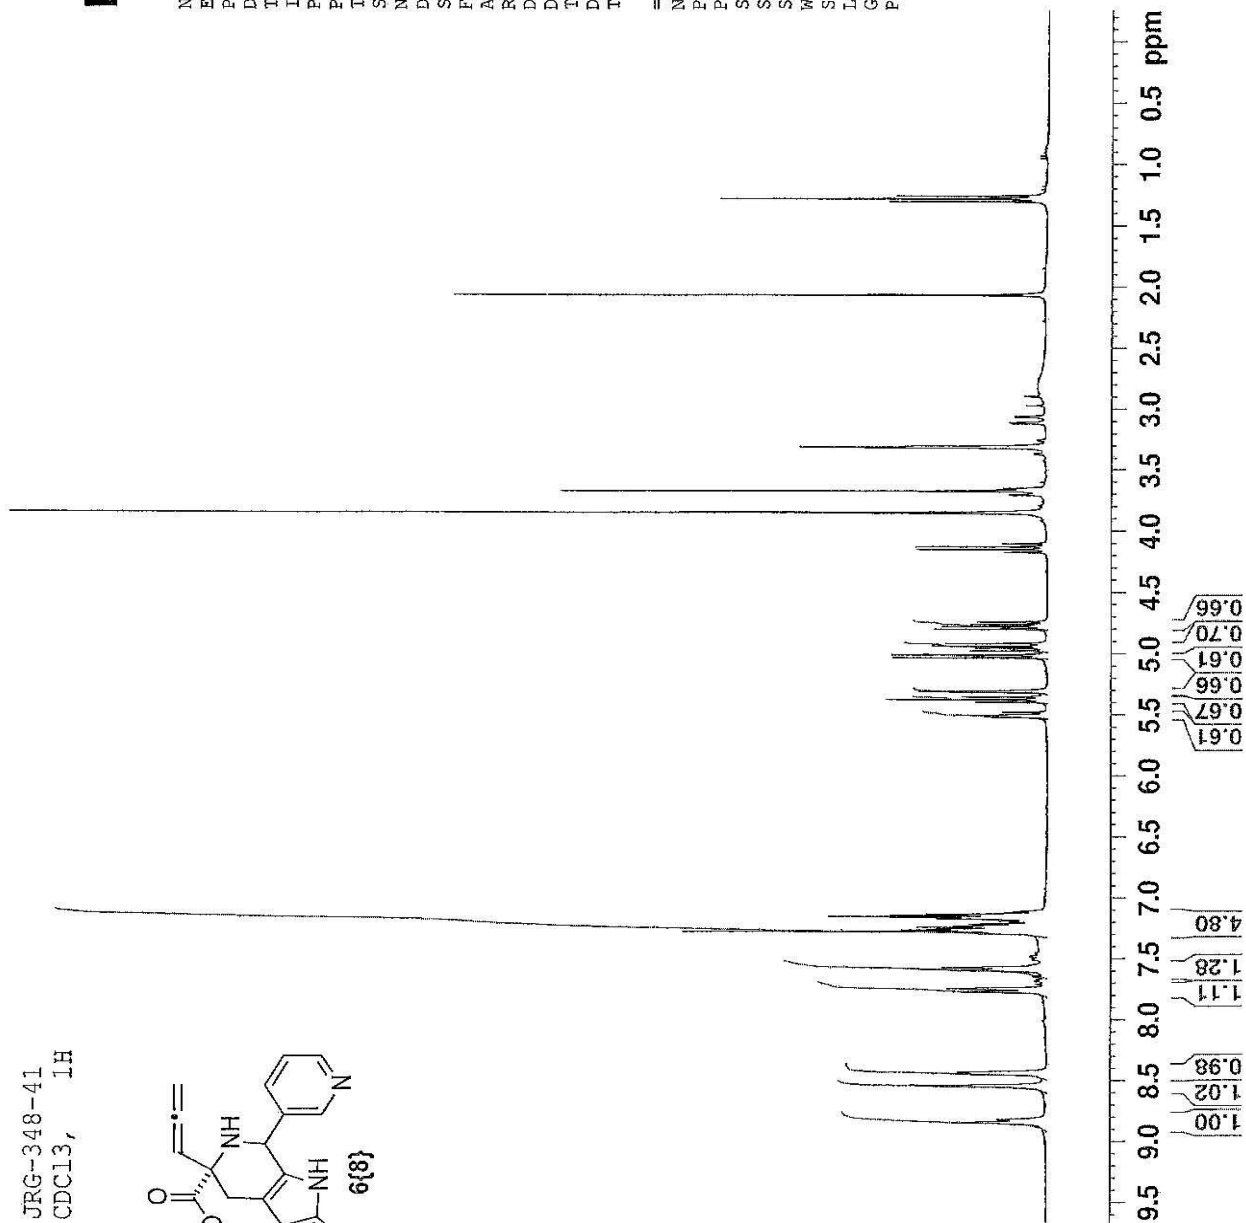

JRG-329-89  
CDCl3, 1H

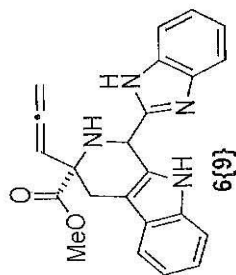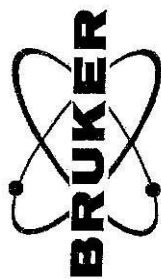

NAME JRG-329-89  
EXPNO 1  
PROCNO 1  
Date\_ 20110505  
Time 23.30  
INSTRUM spect  
PROBHD 5 mm Multinucl  
PULPROG zg30  
TD 32768  
SOLVENT CDCl3  
NS 16  
DS 2  
SWH 6188.119 Hz  
FIDRES 0.188846 Hz  
AQ 2.6477044 sec  
RG 64  
DW 80.800 usec  
DE 6.50 usec  
TE 293.3 K  
D1 1.00000000 sec  
TD0 1

===== CHANNEL f1 =====  
NUC1 1H  
P1 13.20 usec  
PL1 -2.00 dB  
PL1W 18.20942116 W  
SFO1 300.2318540 MHz  
SI 32768  
SF 300.2300000 MHz  
WDW EM  
SSB 0  
LB 0.10 Hz  
GB 0  
PC 1.00

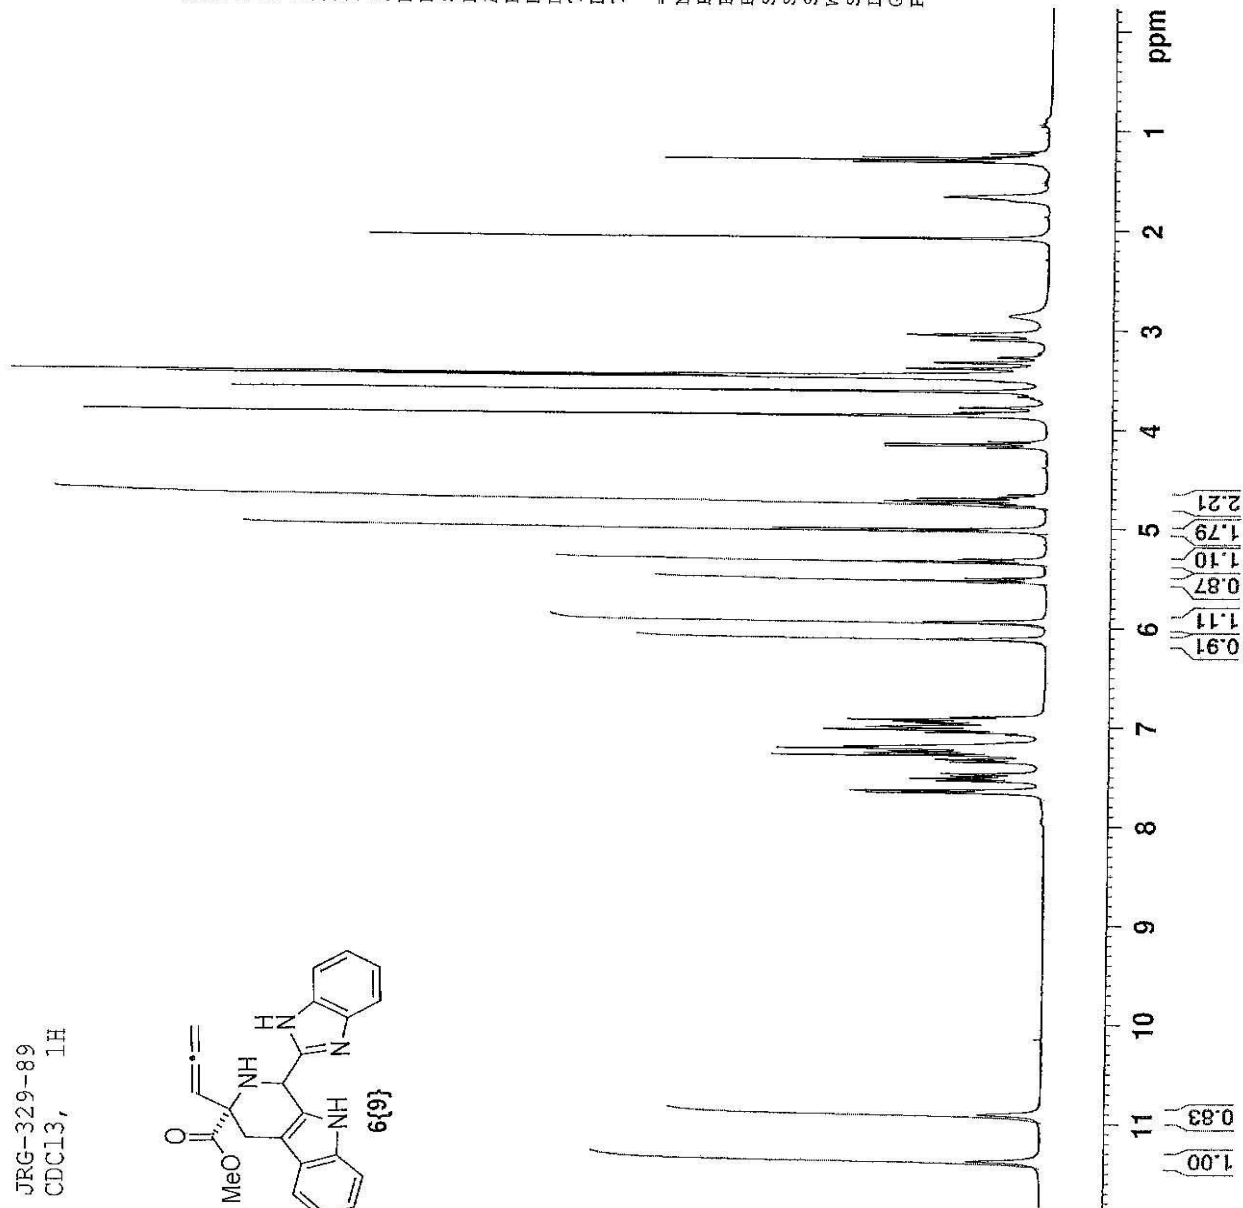

JRG-329-90b  
CDCl3, 1H

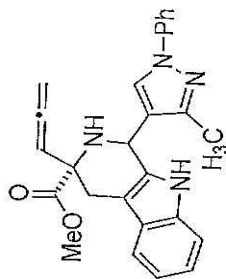

6{10}

**BRUKER**

NAME JRG-329-90b  
EXPNO 1  
PROCNO 1  
Date\_ 20110505  
Time 23.10  
INSTRUM spect  
PROBHD 5 mm Multinucl  
PULPROG zg30  
TD 32768  
SOLVENT CDCl3  
NS 16  
DS 2  
SWH 6188.119 Hz  
FIDRES 0.188846 Hz  
AQ 2.6477044 sec  
RG 50.8  
DW 80.800 usec  
DE 6.50 usec  
TE 293.3 K  
D1 1.0000000 sec  
TD0 1

===== CHANNEL f1 =====  
NUC1 1H  
P1 13.20 usec  
PL1 -2.00 dB  
PL1W 18.20942116 W  
SFO1 300.2318540 MHz  
SI 32768  
SF 300.2300000 MHz  
WDW EM  
SSB 0  
LB 0.10 Hz  
GB 0  
PC 1.00

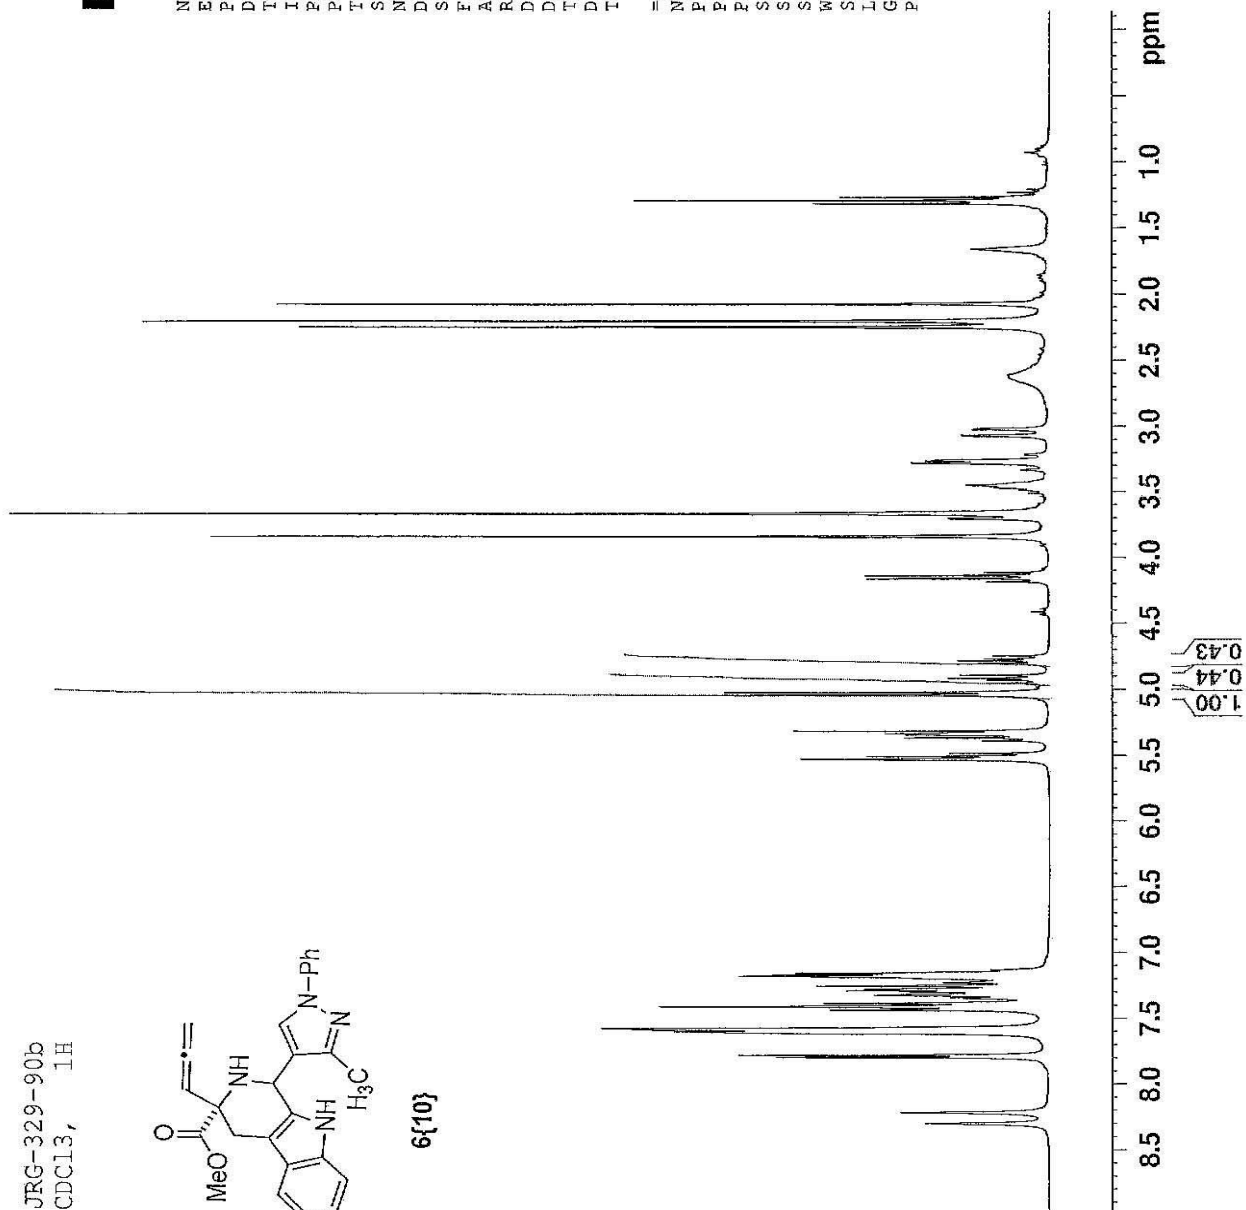

JRG-348-55  
CDCl<sub>3</sub>, <sup>1</sup>H

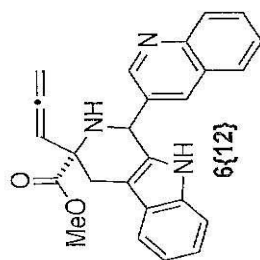

**BRUKER**

NAME JRG-348-55  
EXPNO 1  
PROCNO 1  
Date\_ 20110709  
Time 12.35  
INSTRUM spect  
PROBHD 5 mm Dual 13C/  
PULPROG zg30  
TD 32768  
SOLVENT CDCl<sub>3</sub>  
NS 16  
DS 2  
SWH 6172.839 Hz  
FIDRES 0.188380 Hz  
AQ 2.6542580 sec  
RG 228.1  
DW 81.000 usec  
DE 6.50 usec  
TE 294.2 K  
D1 1.00000000 sec  
TD0 1

===== CHANNEL f1 =====  
NUC1 <sup>1</sup>H  
P1 6.20 usec  
PL1 4.00 dB  
SFO1 300.1418535 MHz  
SI 32768  
SF 300.1400000 MHz  
WDW EM  
SSB 0  
LB 0.30 Hz  
GB 0  
PC 1.00

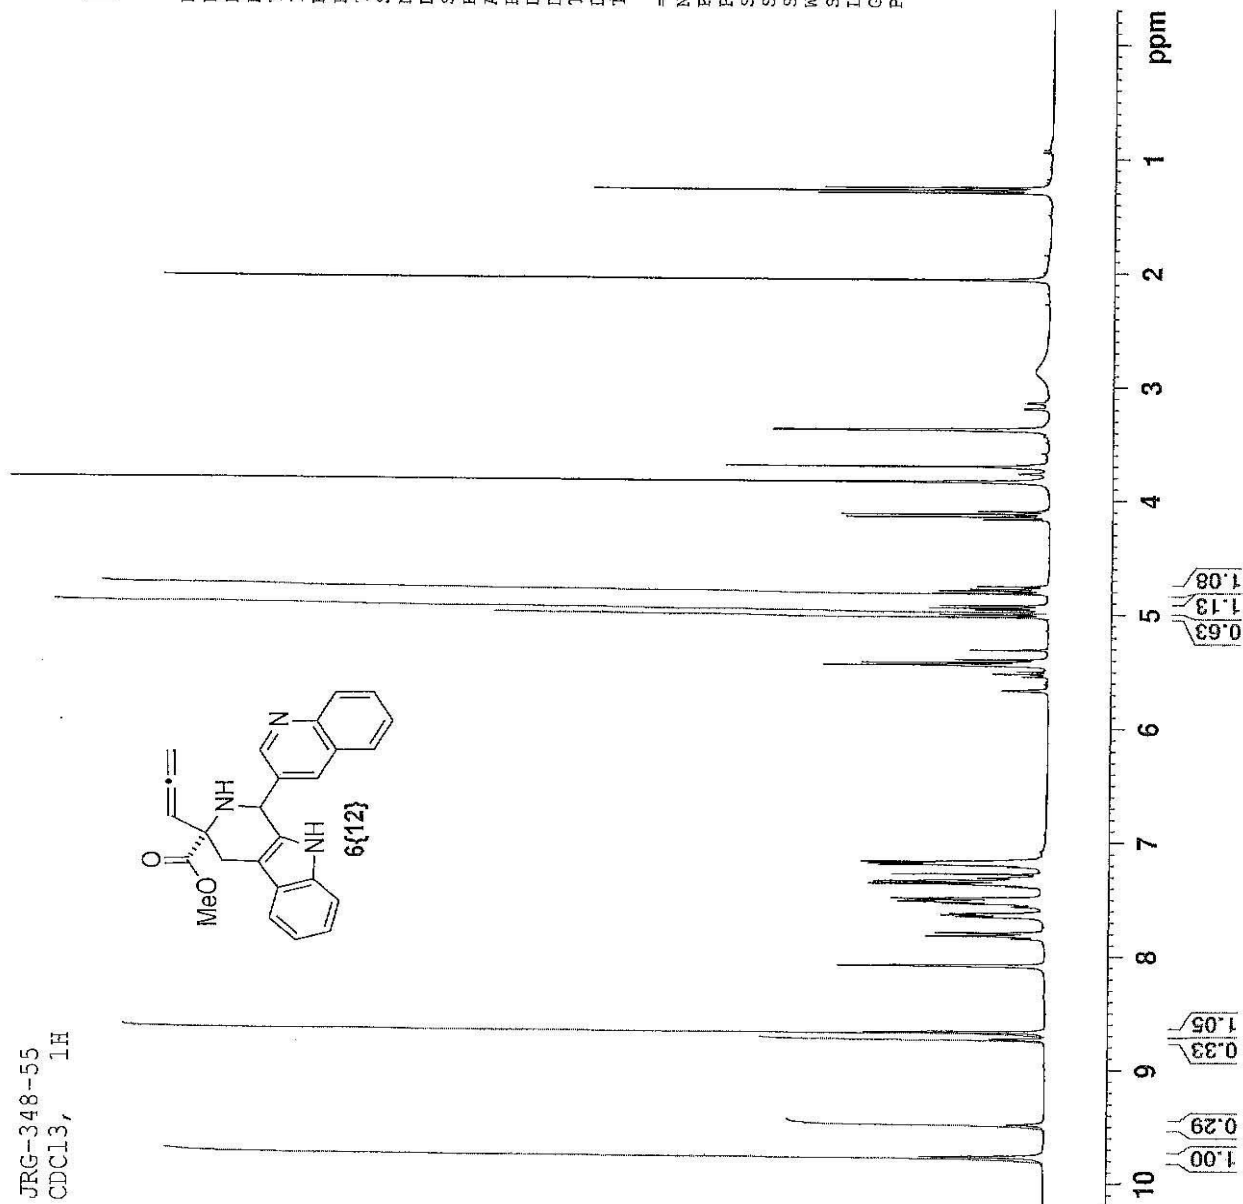

JRG-348-56  
CDCl<sub>3</sub>, <sup>1</sup>H

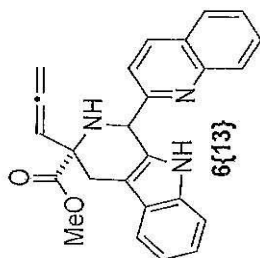

**BRUKER**

JRG-348-56

NAME  
EXNO 1  
PROCNO 1  
Date\_ 20110709  
Time\_ 12.42  
INSTRUM spect  
PROBHD 5 mm Dual 13C/  
PULPROG zg30  
TD 32768  
SOLVENT CDCl<sub>3</sub>  
NS 16  
DS 2  
SWH 6172.839 Hz  
FIDRES 0.188380 Hz  
AQ 2.6542580 sec  
RG 256  
DW 81.000 usec  
DE 6.50 usec  
TE 294.2 K  
D1 1.00000000 sec  
TD0 1

===== CHANNEL f1 =====  
NUC1 <sup>1</sup>H  
P1 6.20 usec  
PL1 4.00 dB  
SFO1 300.1418535 MHz  
SI 32768  
SF 300.1400000 MHz  
WDW EM  
SSB 0  
LB 0.30 Hz  
GB 0  
PC 1.00

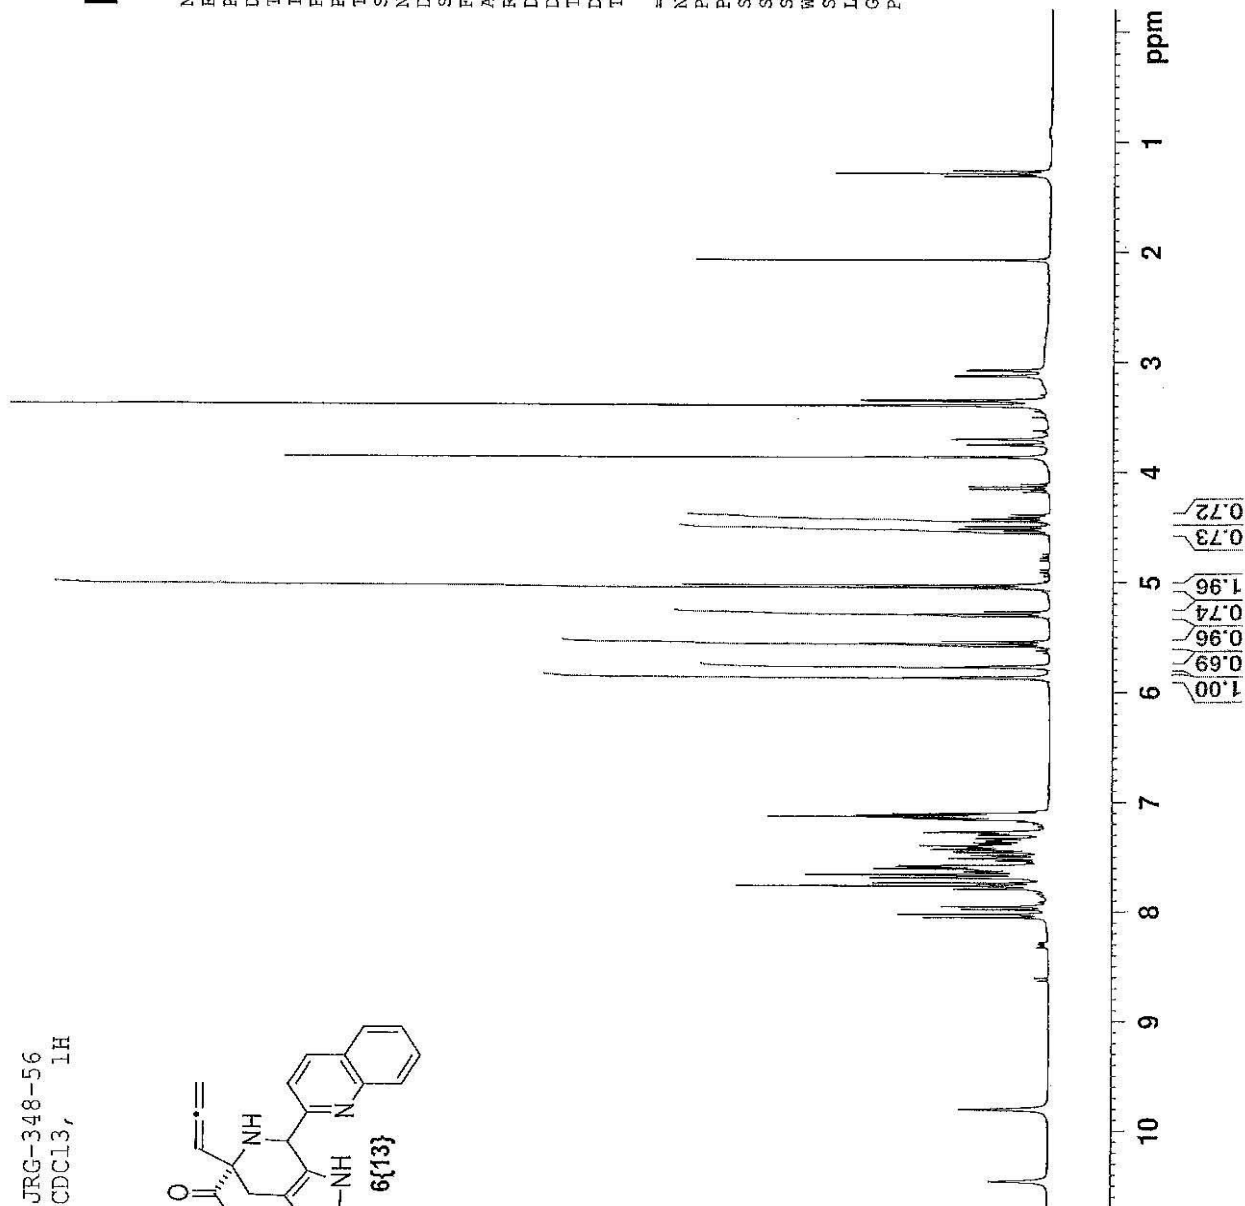



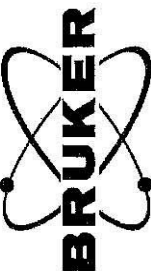

NAME JRG-348-57  
EXPNO 1  
PROCNO 1  
Date\_ 20110709  
Time 12.53  
INSTRUM spect  
PROBHD 5 mm Dual 13C/  
PULPROG zg30  
TD 32768  
SOLVENT CDCl3  
NS 16  
DS 2  
SWH 6172.839 Hz  
FIDRES 0.188380 Hz  
AQ 2.6542580 sec  
RG 456.1  
DM 81.000 usec  
DE 6.50 usec  
TE 294.2 K  
D1 1.00000000 sec  
TD0 1

===== CHANNEL f1 =====  
NUC1 1H  
P1 6.20 usec  
PL1 4.00 dB  
SFO1 300.1418335 MHz  
SI 32768  
SF 300.1400000 MHz  
WDW EM  
SSB 0  
LB 0.30 Hz  
GB 0  
PC 1.00

JRG-348-57  
CDCl3, 1H

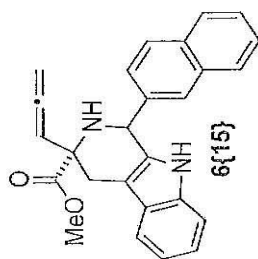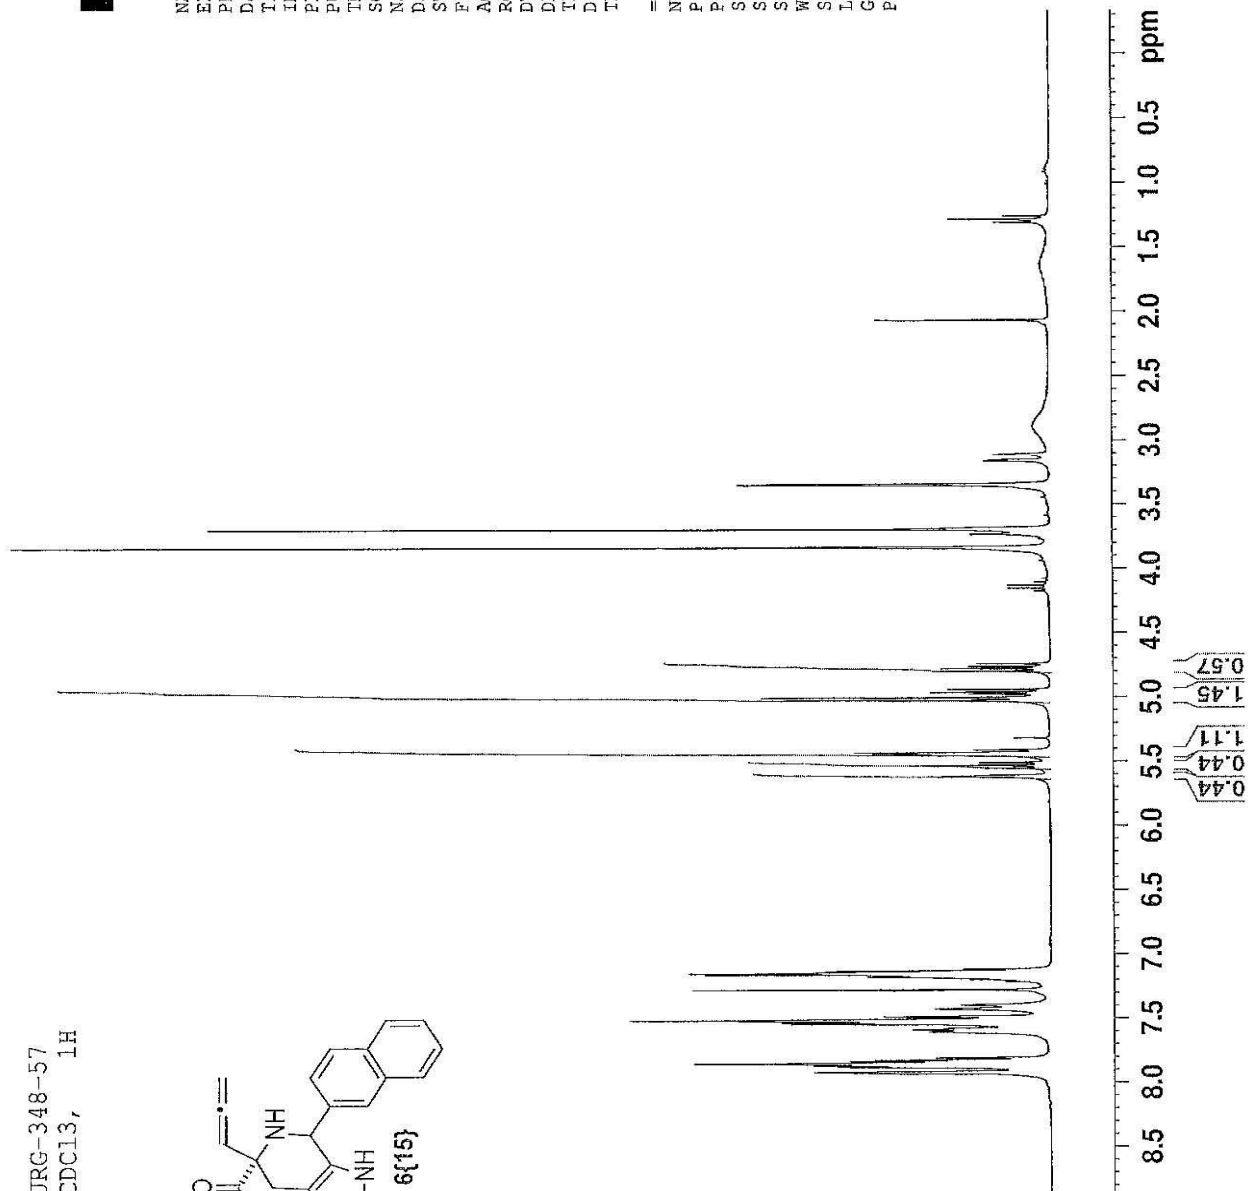

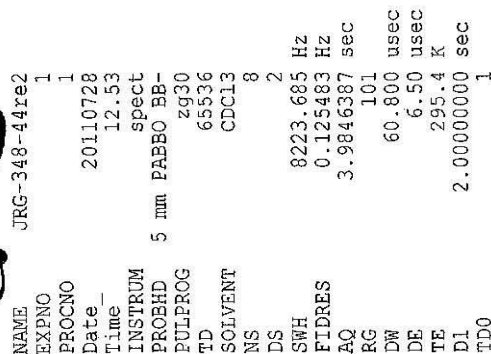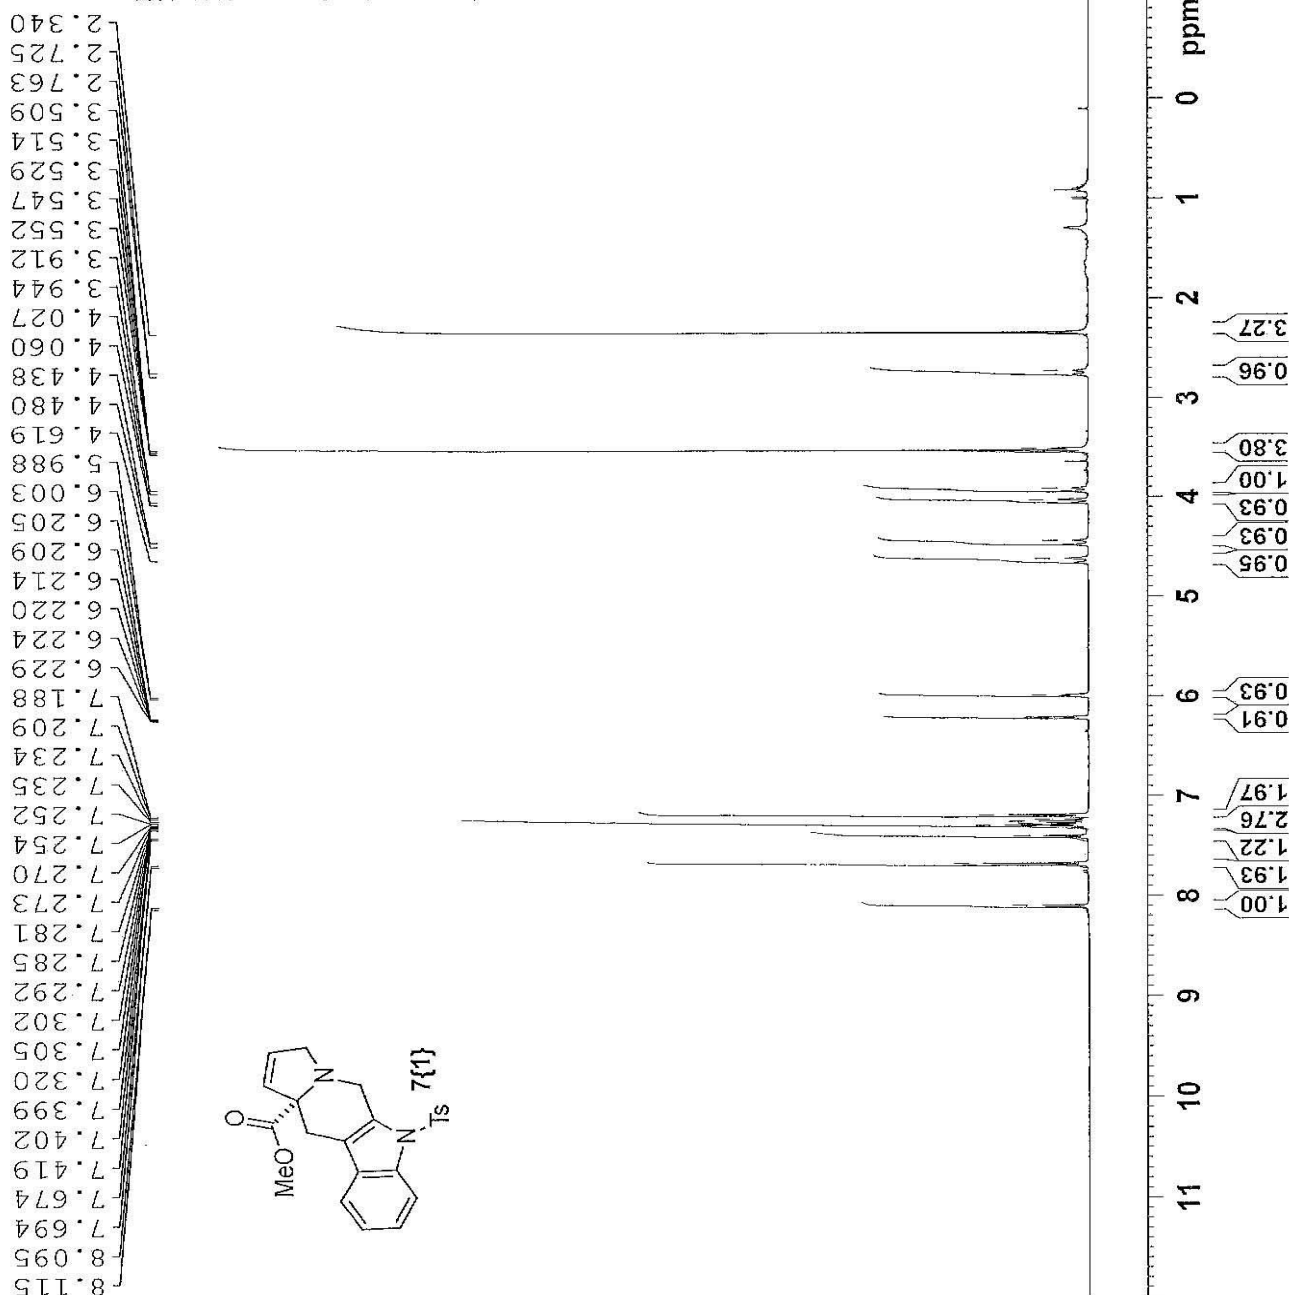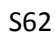

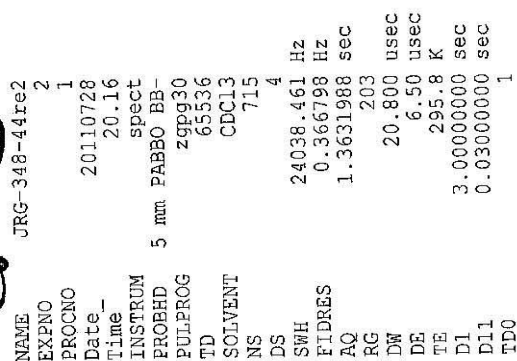

| Category | Value |
|----------|-------|
| NA       | 71.81 |
| EX       | 56.93 |
| PR       | 51.70 |
| Da       | 45.36 |
| TI       | 31.56 |
| IN       | 29.48 |
| ER       | 22.62 |
| PU       | 21.49 |
|          | 14.10 |

173.86  
144.67  
136.37  
135.51  
135.56  
132.01  
131.19  
129.99  
129.81  
129.73  
126.53  
126.43  
124.31  
123.35  
118.33  
116.39  
114.19

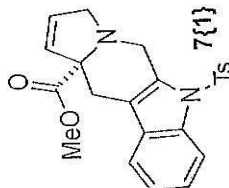

```
===== CHANNEL f1 =====
NUC1      13C
P1         10.00 usec
P1L        -1.59 dB
PL1W       51.07626343 W
SFQ1      100.6479773 MHz
```

| =====   | CHANNEL f2      | ===== |
|---------|-----------------|-------|
| CPDPRG2 | waltz16         |       |
| NUC2    | 1H              |       |
| PCPD2   | 75.00 usec      |       |
| PL2     | -1.00 dB        |       |
| PL12    | 13.39 dB        |       |
| PL13    | 20.00 dB        |       |
| PL2W    | 11.09959412 W   |       |
| PL12W   | 0.40393090 W    |       |
| PL13W   | 0.08816721 W    |       |
| SF02    | 400.2316009 MHz |       |
| SI      | 32768           |       |
| SF      | 100.6379191 MHz |       |
| WDW     | EM              |       |
| SSB     | 0               |       |
| LB      | 1.00 Hz         |       |
| GB      | 0               |       |
| PC      | 1.40            |       |

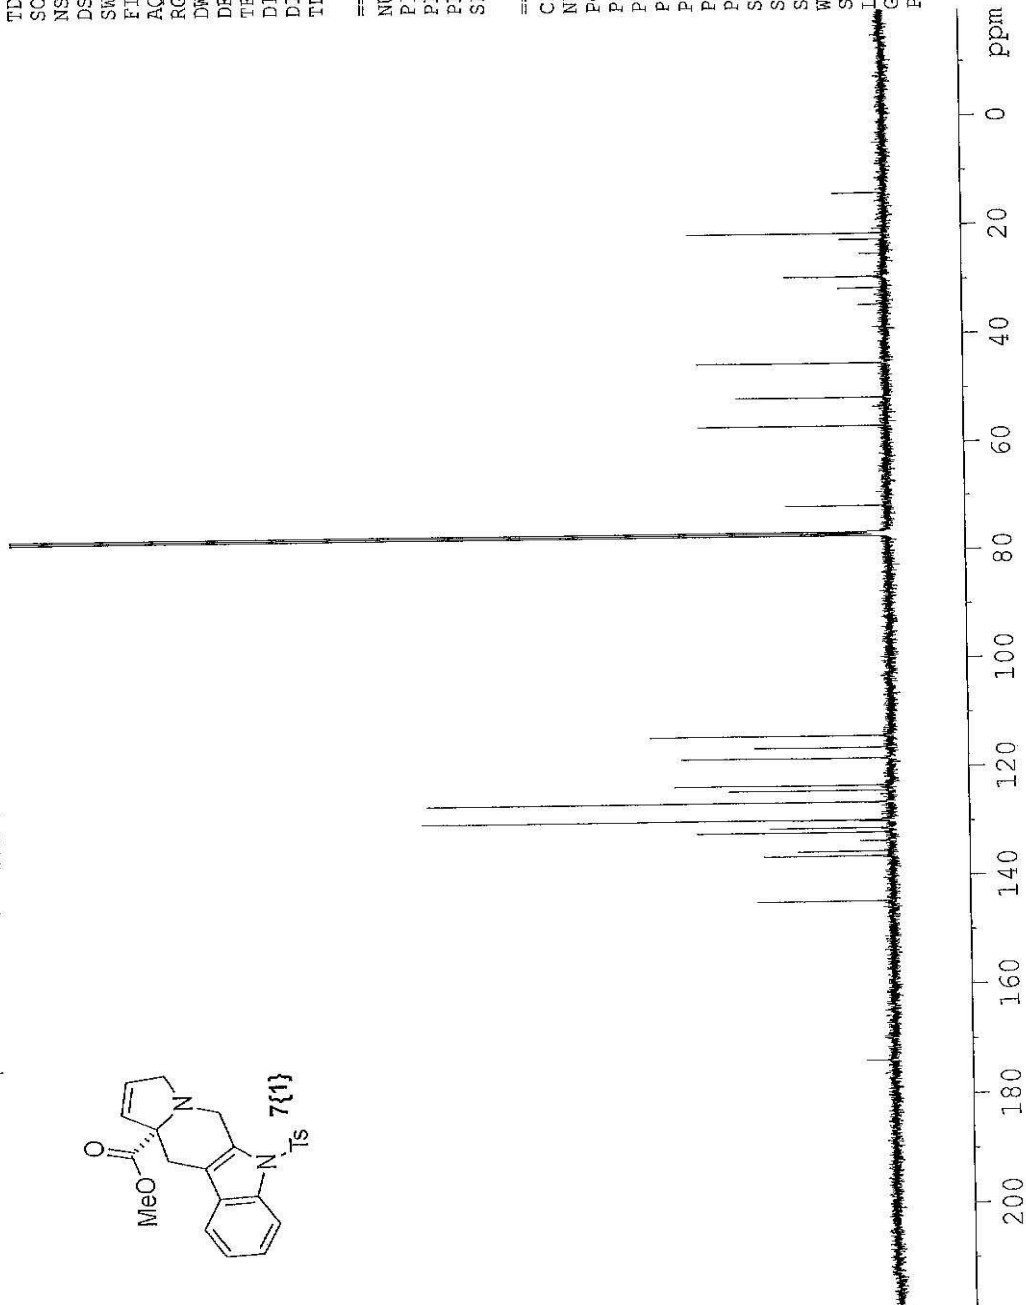

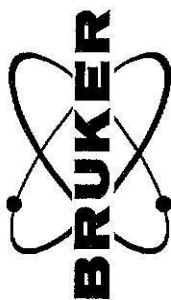

JRG-348-45bre

NAME  
EXPNO 1  
PROCNO 1  
Date\_ 20110728  
Time\_ 11.12  
INSTRUM spect  
PROBHD 5 mm PABBO BB-  
PULPROG zg30  
TD 65536  
SOLVENT CDCl3  
NS 3  
DS 2  
SWH 8223.685 Hz  
FIDRES 0.125483 Hz  
AQ 3.9846387 sec  
RG 80.6  
DW 60.800 usec  
DE 6.50 usec  
TE 294.9 K  
D1 2.00000000 sec  
TD0 1

===== CHANNEL f1 =====  
NUC1 1H  
P1 14.31 usec  
PL1 -1.00 dB  
PL1W 11.09959412 W  
SFO1 400.2324716 MHz  
SI 32768  
SF 400.2300000 MHz  
WDW EM  
SSB 0  
LB 0.30 Hz  
GB 0  
PC 1.00

8.174  
8.153  
7.668  
7.647  
7.433  
7.414  
7.332  
7.315  
7.311  
7.292  
7.278  
7.197  
7.177  
5.679  
4.494  
4.476  
3.978  
3.943  
3.824  
3.812  
3.527  
3.485  
3.113  
3.078  
3.038  
2.996  
2.345  
1.311  
1.292  
1.192  
1.002  
0.985  
0.928  
0.911  
0.894  
0.884  
0.593  
0.590  
0.573  
0.561  
0.551  
0.537  
0.387  
0.380

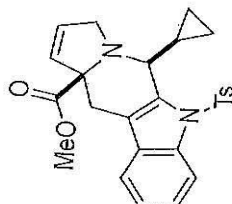

syn-7{2}

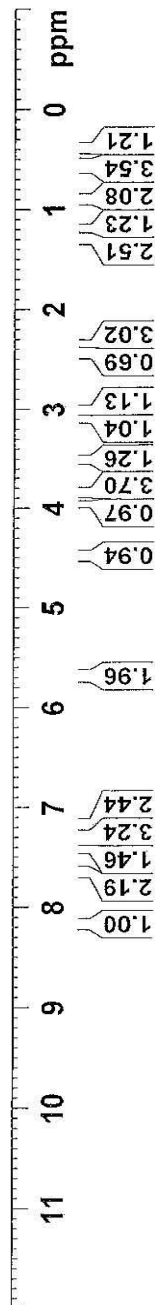

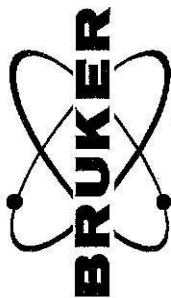

NAME JRG-348-45bre  
 EXPNO 2  
 PROCNO 1  
 Date\_ 20110728  
 Time\_ 11.26  
 INSTRUM spect  
 PROBHD 5 mm PABBO BB-  
 PULPROG zgpg30  
 TD 65536  
 SOLVENT CDCl3  
 NS 274  
 DS 4  
 SWH 24038.461 Hz  
 FIDRES 0.366798 Hz  
 AQ 1.3631988 sec  
 RG 203  
 DW 20.800 usec  
 DE 6.50 usec  
 TE 295.6 K  
 D1 3.00000000 sec  
 D11 0.03000000 sec  
 TD0 1

==== CHANNEL f1 =====  
 NUC1 13C  
 P1 10.00 usec  
 PL1 -1.59 dB  
 PL1W 51.07626343 W  
 SFO1 100.6479773 MHz

==== CHANNEL f2 =====  
 CPDPRG2 waltz16  
 NUC2 1H  
 PCPD2 75.00 usec  
 PL2 -1.00 dB  
 PL12 13.39 dB  
 PL13 20.00 dB  
 PL12W 11.09959412 W  
 PL12W 0.40393090 W  
 PL13W 0.08816721 W  
 SFO2 400.2316009 MHz  
 SI 32768  
 SF 100.6379202 MHz  
 WDW EM  
 SSB 0  
 LB 1.00 Hz  
 GB 0  
 PC 1.40

71.74  
 61.14  
 59.26  
 52.92  
 34.62  
 31.54  
 27.60  
 25.23  
 22.61  
 21.50  
 16.35  
 14.09  
 4.04  
 3.70

175.74  
 144.81  
 136.55  
 136.38  
 136.07  
 133.56  
 130.16  
 129.67  
 127.71  
 126.43  
 124.45  
 123.59  
 118.16  
 117.56  
 114.99

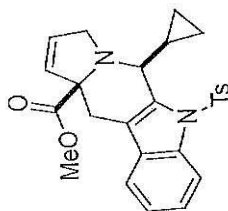

syn-7{2}

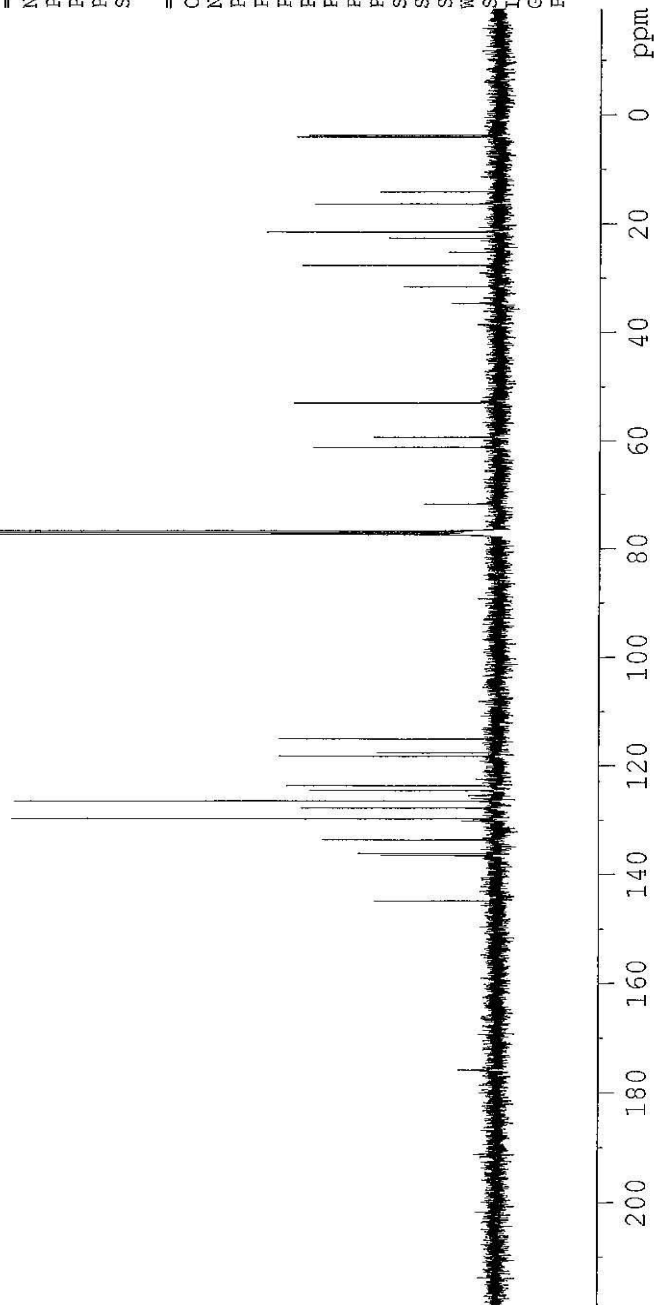

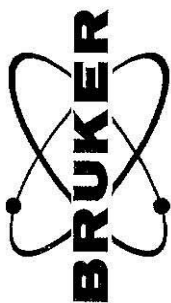

NAME JRG-348-46bre  
 EXPNO 1  
 PROCNO 1  
 Date\_ 20110728  
 Time 12.10  
 INSTRUM spect  
 PROBHD 5 mm PABBO BB-  
 PULPROG zg30  
 TD 65536  
 SOLVENT CDCl3  
 NS 4  
 DS 2  
 SWH 8223.685 Hz  
 FIDRES 0.125483 Hz  
 AQ 3.9846387 sec  
 RG 80.6  
 DW 60.800 usec  
 DE 6.50 usec  
 TE 295.3 K  
 D1 2.00000000 sec  
 TD0 1

===== CHANNEL f1 =====  
 NUC1 1H  
 P1 14.31 usec  
 PL1 -1.00 dB  
 PL1W 11.09959412 W  
 SFO1 400.2324716 MHz  
 SI 32768  
 SF 400.2300000 MHz  
 WDW EM  
 SSB 0  
 LB 0.30 Hz  
 GB 0  
 PC 1.00

8.191  
 8.171  
 7.656  
 7.635  
 7.404  
 7.386  
 7.384  
 7.341  
 7.323  
 7.320  
 7.303  
 7.299  
 7.292  
 7.286  
 7.283  
 7.267  
 7.265  
 7.207  
 7.186  
 5.791  
 5.776  
 5.735  
 4.071  
 4.037  
 3.786  
 3.513  
 3.472  
 3.340  
 3.305  
 2.850  
 2.809  
 2.353  
 1.573  
 1.564  
 1.549  
 1.539  
 1.513  
 1.149  
 1.132  
 1.006  
 0.989  
 0.946  
 0.929  
 0.915

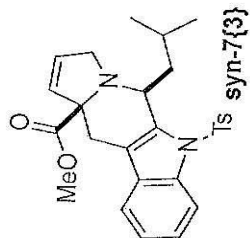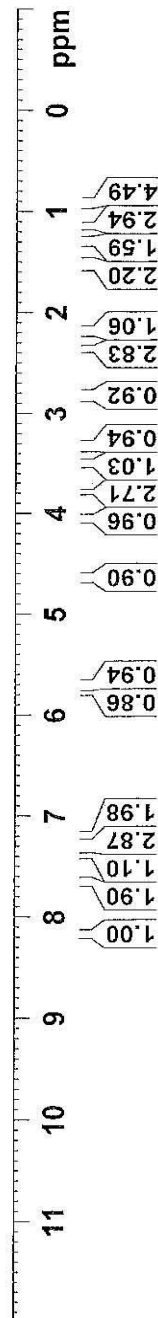

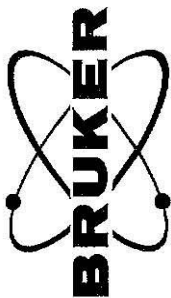

NAME JRG-348-46pre  
 EXENO 2  
 PROCNO 1  
 Date 20110728  
 Time 12.29  
 INSTRUM spect  
 PROBHD 5 mm PABBO BB-  
 PULPROG zgpg30  
 TD 65536  
 SOLVENT CDCl3  
 NS 239  
 DS 4  
 SWH 24038.461 Hz  
 FIDRES 0.366798 Hz  
 AQ 1.3631988 sec  
 RG 203  
 DW 20.800 usec  
 DE 6.50 usec  
 TE 295.8 K  
 D1 3.00000000 sec  
 D11 0.03000000 sec  
 TD0 1

===== CHANNEL f1 =====  
 NUC1 13C  
 P1 10.00 usec  
 PL1 -1.59 dB  
 PL1W 51.07626343 W  
 SFO1 100.6479773 MHz

===== CHANNEL f2 =====  
 CPDPRG2 waltz16  
 NUC2 1H  
 PCPD2 75.00 usec  
 PL2 -1.00 dB  
 PL12 13.39 dB  
 PL13 20.00 dB  
 PL2W 11.09959412 W  
 PL12W 0.40393090 W  
 PL13W 0.08816721 W  
 SFO2 400.2316009 MHz  
 SI 32768  
 SF 100.6379208 MHz  
 WDW EM  
 SSB 0  
 LB 1.00 Hz  
 GB 0  
 PC 1.40

70.41  
 61.91  
 55.03  
 52.69  
 43.90  
 31.54  
 26.69  
 25.23  
 24.83  
 23.67  
 21.50  
 20.85  
 14.08

175.49  
 144.69  
 138.15  
 136.66  
 135.93  
 133.65  
 129.92  
 129.66  
 127.60  
 126.31  
 124.31  
 123.51  
 118.10  
 116.42  
 114.88

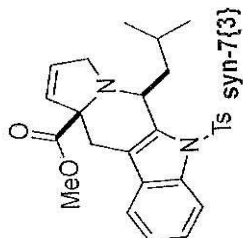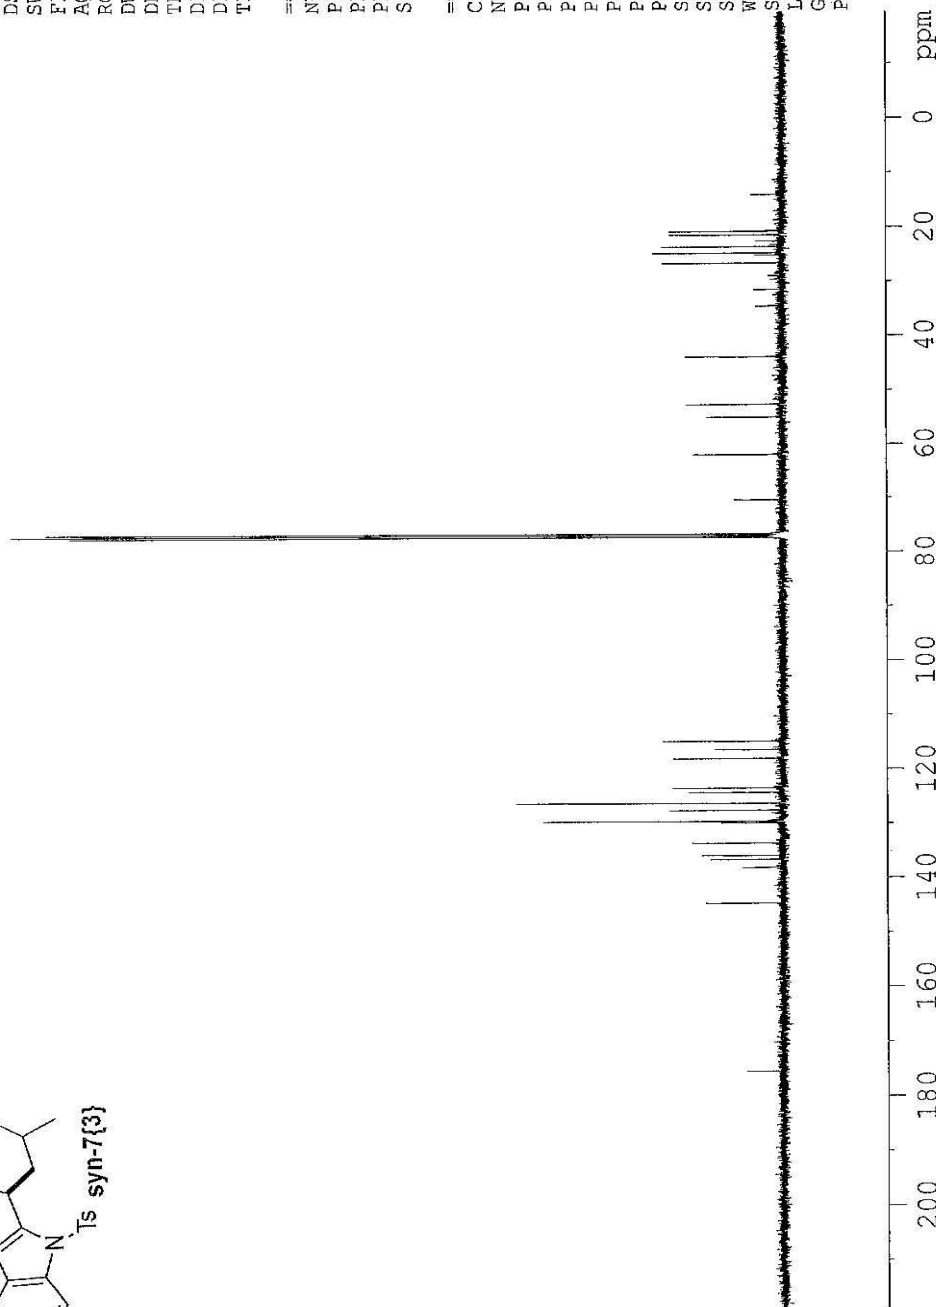

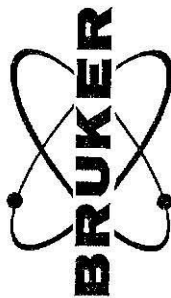

JRG-348-51re

|      |       |        |          |       |         |                |         |       |         |    |    |             |             |               |     |             |           |         |                |     |
|------|-------|--------|----------|-------|---------|----------------|---------|-------|---------|----|----|-------------|-------------|---------------|-----|-------------|-----------|---------|----------------|-----|
| NAME | EXPNO | PROCNO | Date_    | Time_ | INSTRUM | PROBHD         | PULPROG | TD    | SOLVENT | NS | DS | SWH         | FIDRES      | AQ            | RG  | DW          | DE        | TE      | D1             | TD0 |
|      | 1     | 1      | 20110727 | 0.21  | spect   | 5 mm PABBO BB- | zg30    | 65536 | CDC13   | 10 | 2  | 8223.685 Hz | 0.125483 Hz | 3.9846387 sec | 144 | 60.800 usec | 6.50 usec | 295.0 K | 2.00000000 sec | 1   |

  

|       |                 |       |
|-------|-----------------|-------|
| ===== | CHANNEL f1      | ===== |
| NUC1  | 1H              |       |
| P1    | 14.31 usec      |       |
| PL1   | -1.00 dB        |       |
| PL1W  | 11.09959412 W   |       |
| SFO1  | 400.2324716 MHz |       |
| SI    | 32768           |       |
| SF    | 400.2300000 MHz |       |
| WDW   | EM              |       |
| SSB   | 0               |       |
| LB    | 0.30 Hz         |       |
| GB    | 0               |       |
| PC    | 1.00            |       |

7.982  
7.977  
7.968  
7.960  
7.976  
7.476  
7.467  
7.460  
7.454  
7.401  
7.380  
7.292  
7.286  
7.278  
7.268  
7.264  
7.071  
7.051  
6.109  
6.094  
5.953  
5.949  
5.943  
5.938  
5.904  
3.855  
3.822  
3.572  
3.302  
3.269  
2.996  
2.990  
2.959  
2.953  
2.993

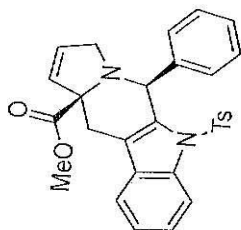

syn-7{4}

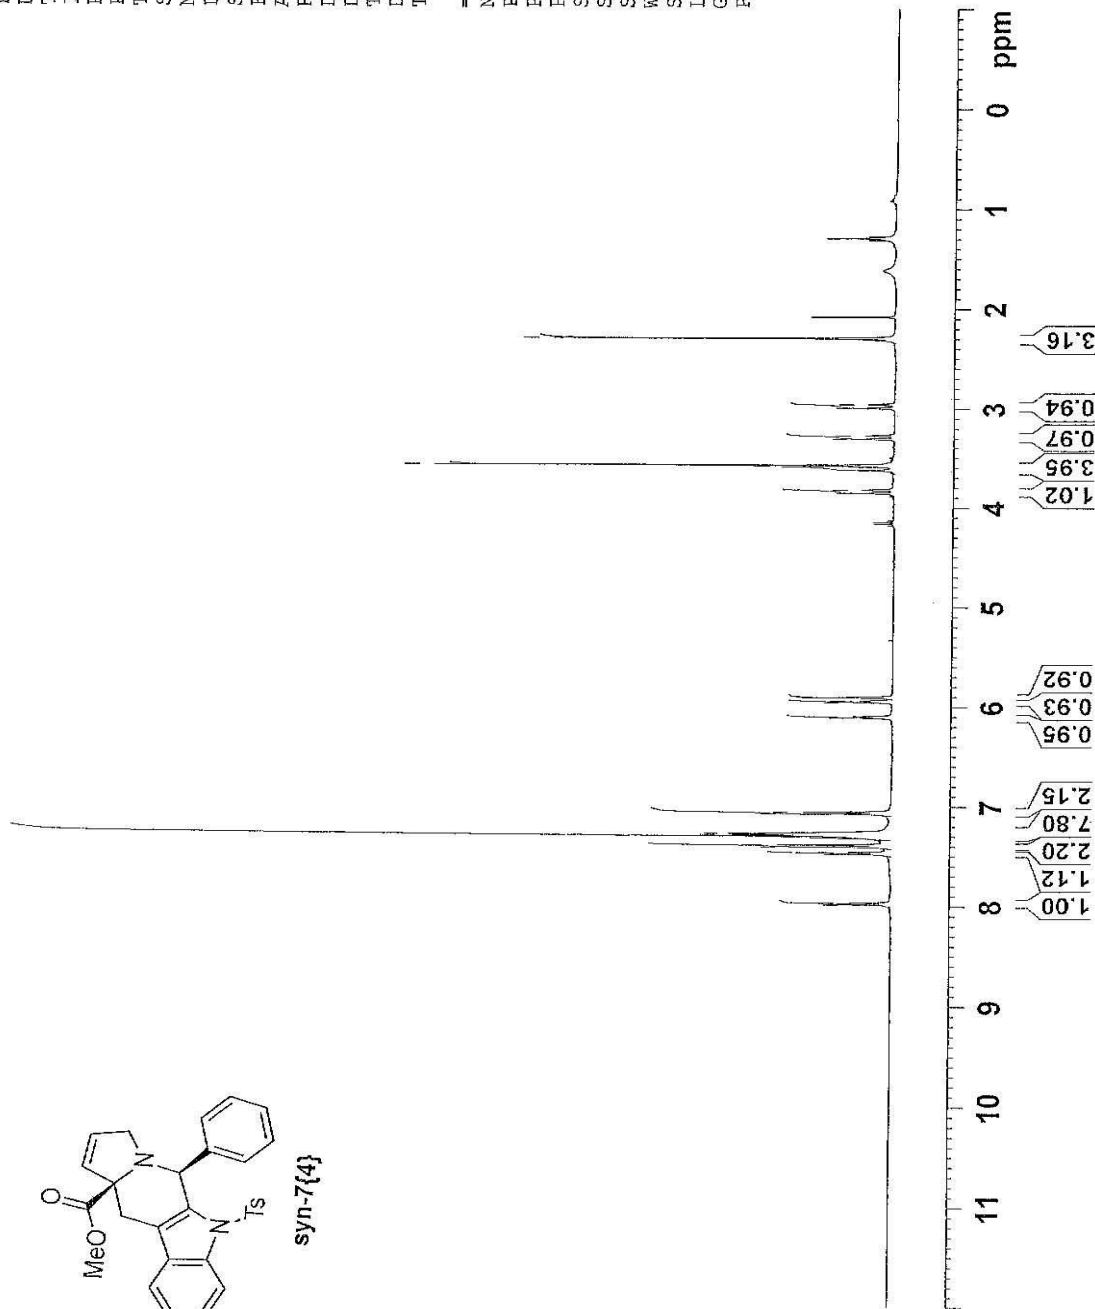



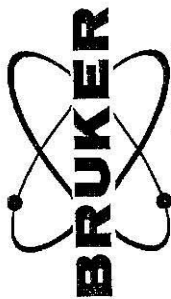

NAME JRG-348-Sire  
 EXPNO 2  
 PROCNO 1  
 Date\_ 20110727  
 Time 1.40  
 INSTRUM spect  
 PROHD 5 mm PABBO BB-  
 PULPROG zgpg30  
 TD 65536  
 SOLVENT CDCl3  
 NS 1024  
 DS 4  
 SWH 24038.461 Hz  
 FIDRES 0.366798 Hz  
 AQ 1.3631988 sec  
 RG 203  
 DW 20.800 usec  
 DE 6.50 usec  
 TE 295.4 K  
 D1 3.00000000 sec  
 D11 0.03000000 sec  
 TD0 1

==== CHANNEL f1 =====  
 NUC1 13C  
 P1 10.00 usec  
 PL1 -1.59 dB  
 PL1W 51.07626343 W  
 SFO1 100.6479773 MHz

==== CHANNEL f2 =====  
 CPDPRG2 waltz16  
 NUC2 1H  
 PCPD2 75.00 usec  
 PL2 -1.00 dB  
 PL12 13.39 dB  
 PL13 20.00 dB  
 PL2W 11.09959412 W  
 PL12W 0.40393090 W  
 PL13W 0.08816721 W  
 SFO2 400.2316009 MHz  
 SI 32768  
 SF 100.6379196 MHz  
 WDW EM  
 SSB 0  
 LB 1.00 Hz  
 GB 0  
 PC 1.40

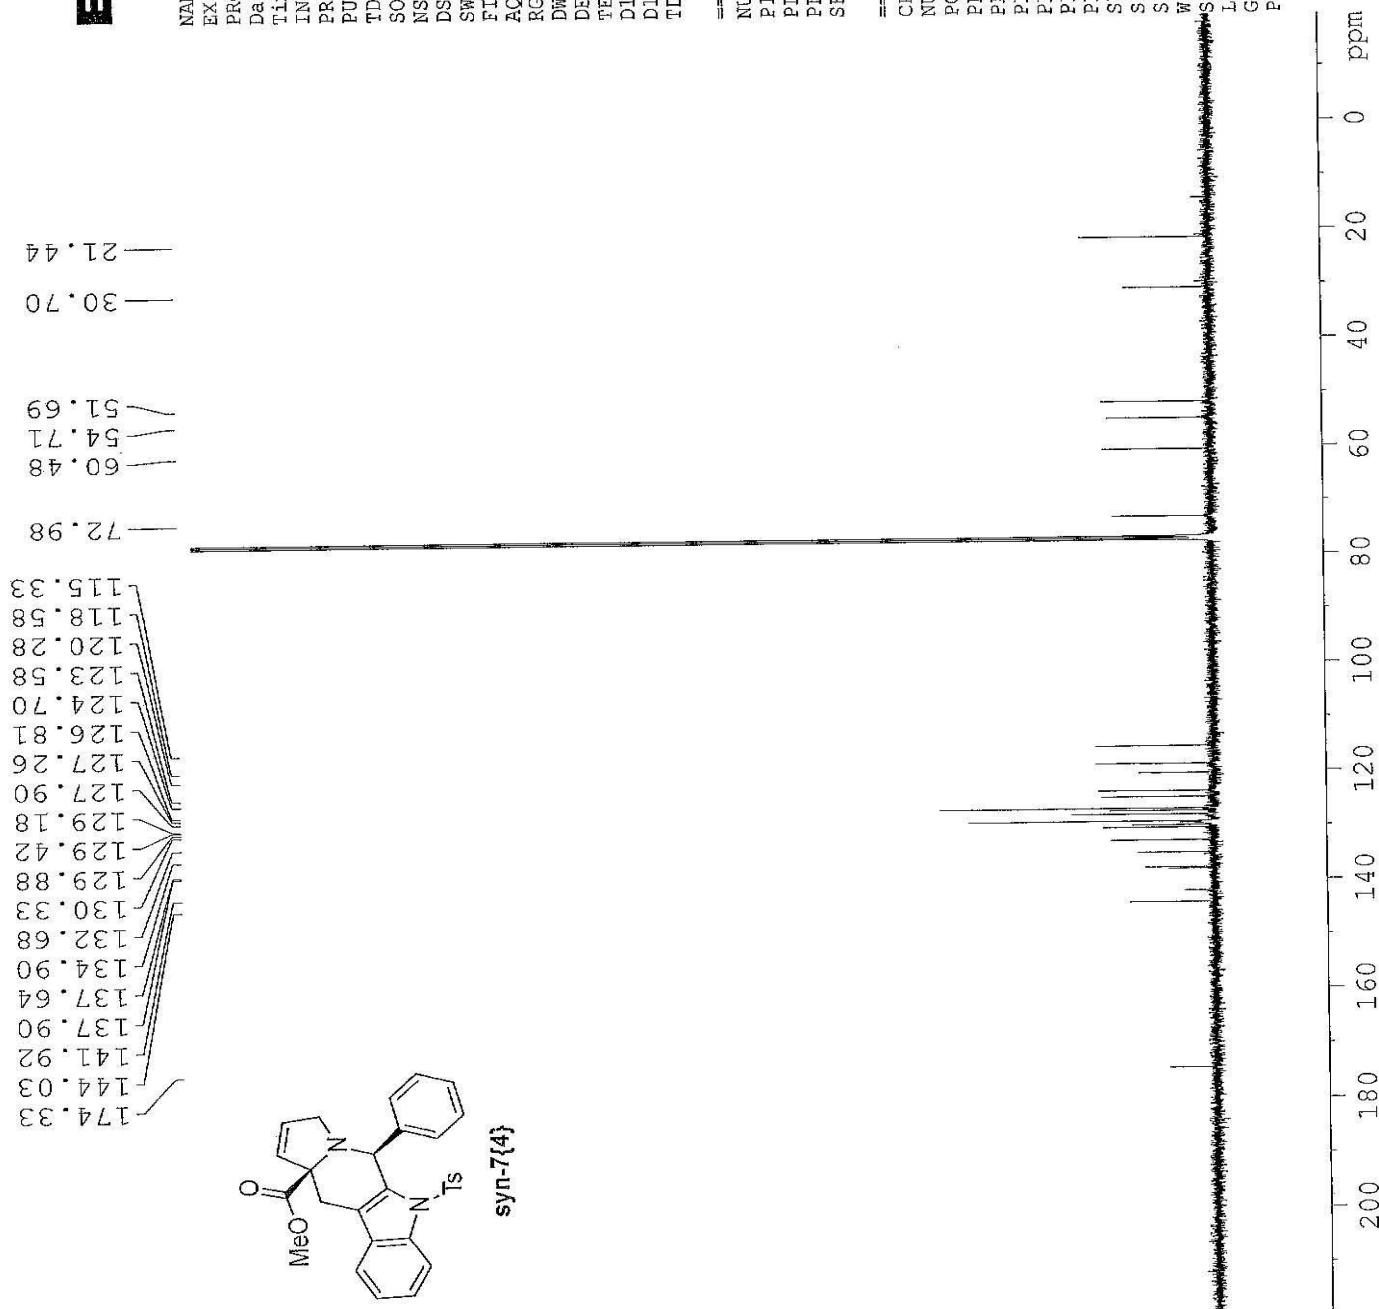

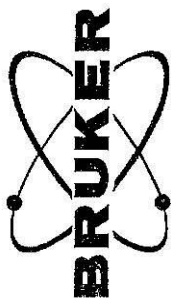

NAME JRG-348-51bre  
 EXPNO 1  
 PROCNO 1  
 Date\_ 20110727  
 Time\_ 3.10  
 INSTRUM spect  
 PROBHD 5 mm PABBO BB-  
 PULPROG zg30  
 TD 65536  
 SOLVENT CDCl3  
 NS 6  
 DS 2  
 SWH 8223.685 Hz  
 FIDRES 0.125483 Hz  
 AQ 3.9846387 sec  
 RG 90.5  
 DW 60.800 usec  
 DE 6.50 usec  
 TE 295.0 K  
 DI 2.00000000 sec  
 TD0 1

===== CHANNEL f1 =====  
 NUC1 1H  
 P1 14.31 usec  
 PL1 -1.00 dB  
 PL1W 11.09959412 W  
 SF01 400.2324716 MHz  
 SI 32768  
 SF 400.2300000 MHz  
 WDW EM  
 SSB 0  
 LB 0.30 Hz  
 GB 0  
 PC 1.00

7.534  
7.516  
7.515  
7.409  
7.392  
7.388  
7.378  
7.375  
7.353  
7.351  
7.332  
7.316  
7.314  
7.292  
7.197  
7.192  
7.184  
7.179  
7.168  
7.056  
7.034  
7.013  
5.992  
5.927  
5.923  
5.917  
5.912  
5.908  
5.756  
5.745  
5.740  
4.328  
4.295  
3.789  
3.755  
3.627  
3.585  
3.120  
2.933  
2.891  
2.307

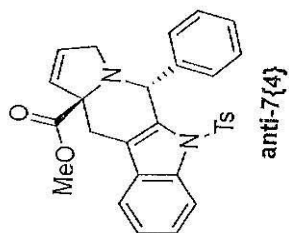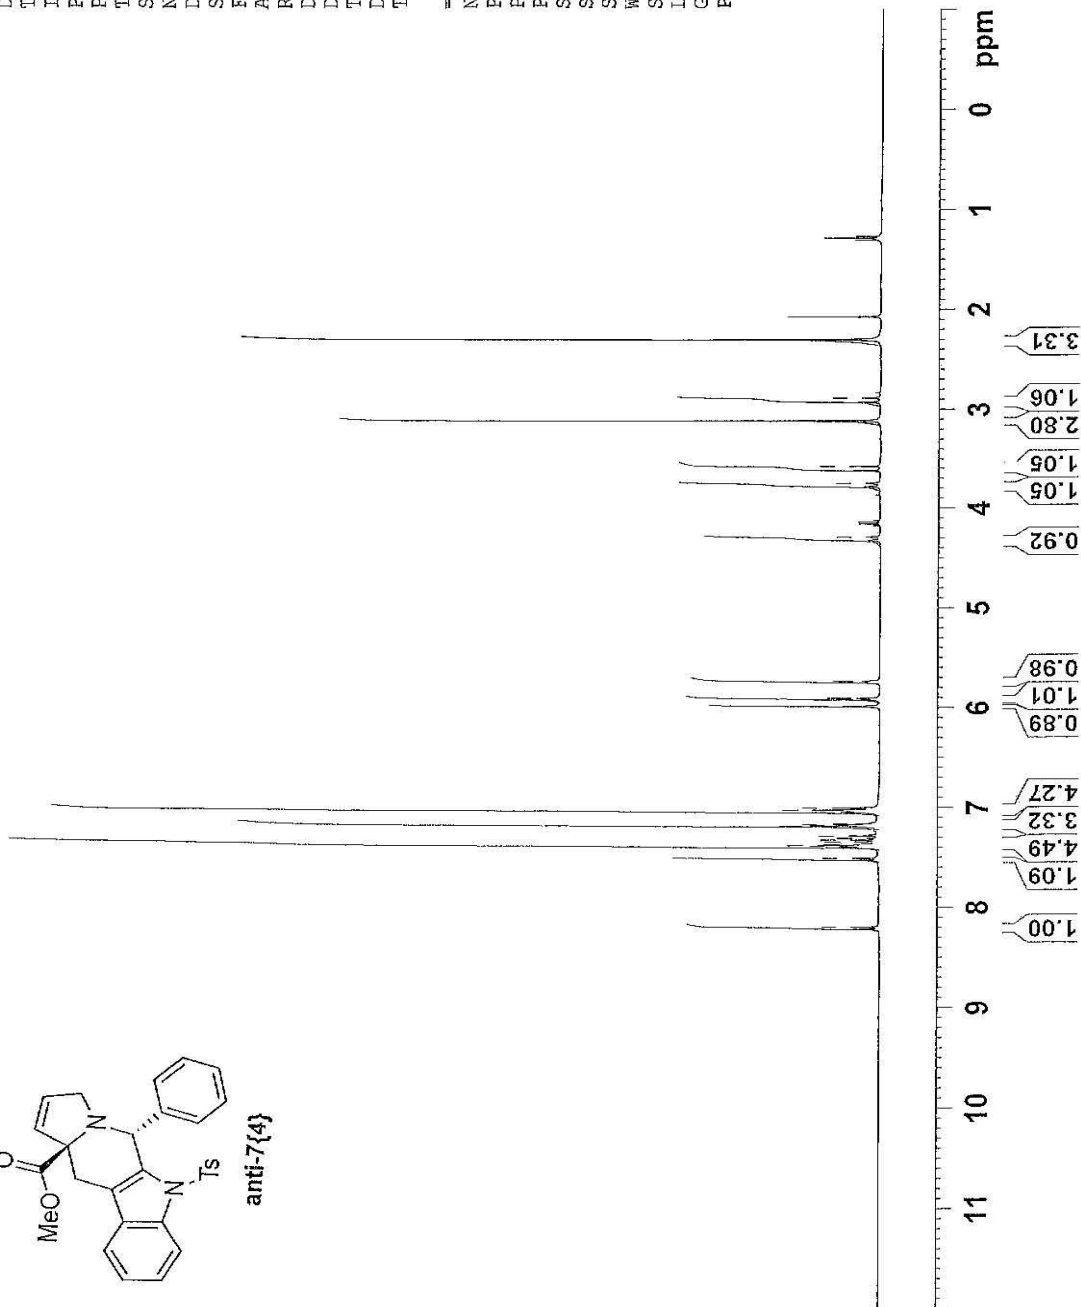

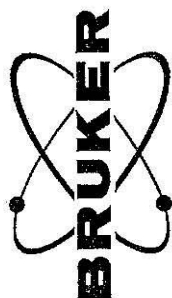

NAME JRG-340-51bre  
 EXPNO 2  
 PROCNO 1  
 Date 20110727  
 Time 3.35  
 INSTRUM spect  
 PROBHD 5 mm PABBO BB-  
 PULPROG zgpg30  
 TD 65536  
 SOLVENT CDCl3  
 NS 300  
 DS 4  
 SWH 24038.461 Hz  
 FIDRES 0.366798 Hz  
 AQ 1.3631988 sec  
 RG 203  
 DW 20.800 usec  
 DE 6.50 usec  
 TE 295.5 K  
 D1 3.00000000 sec  
 D11 0.03000000 sec  
 TD0 1

==== CHANNEL f1 =====  
 NUC1 13C  
 P1 10.00 usec  
 PL1 -1.59 dB  
 PL1W 51.07626343 W  
 SFO1 100.6479773 MHz

==== CHANNEL f2 =====  
 CPDPRG2 waltz16  
 NUC2 1H  
 PCPD2 75.00 usec  
 PL2 -1.00 dB  
 PL12 13.39 dB  
 PL13 20.00 dB  
 PL2W 11.09959412 W  
 PL12W 0.40393090 W  
 PL13W 0.08816721 W  
 SFO2 400.2316009 MHz  
 SI 32768  
 SF 100.6379200 MHz  
 WDW EM  
 SSB 0  
 LB 1.00 Hz  
 GB 0  
 PC 1.40

27.23  
 21.45  
 21.02  
 14.16

69.67  
 60.37  
 60.29  
 58.87  
 52.17

174.69  
 144.49  
 139.58  
 136.45  
 135.59  
 134.13  
 133.92  
 129.44  
 129.36  
 128.48  
 128.21  
 127.94  
 127.07  
 126.58  
 124.70  
 123.43  
 118.56  
 118.21  
 114.60

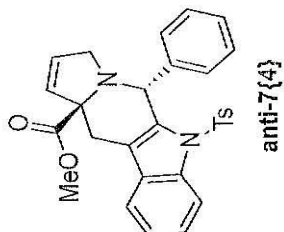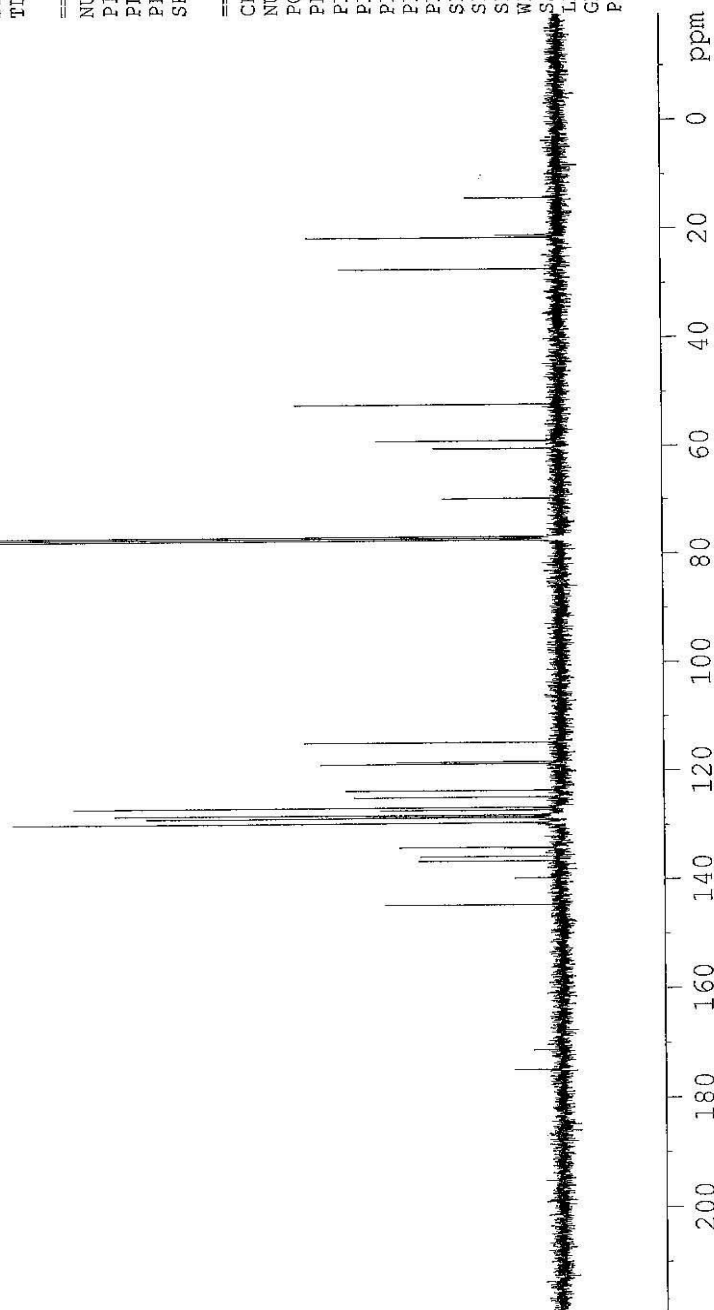

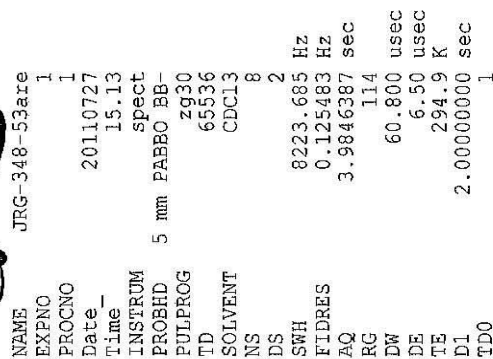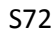

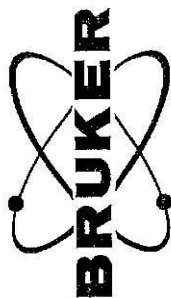

NAME JRG-348-53are  
 EXPNO 2  
 PROCNO 1  
 Date 20110727  
 Time 15.38  
 INSTRUM spect  
 PROBD 5 mm PABBO BB-  
 PULPROG zgpg30  
 TD 65536  
 SOLVENT CDCl3  
 NS 318  
 DS 4  
 SWH 24038.461 Hz  
 FIDRES 0.366798 Hz  
 AQ 1.3631988 sec  
 RG 203  
 DW 20.800 usec  
 DE 6.50 usec  
 TE 295.3 K  
 D1 3.00000000 sec  
 D11 0.03000000 sec  
 TD0 1

==== CHANNEL f1 =====  
 NUC1 13C  
 P1 10.00 usec  
 PL1 -1.59 dB  
 PL1W 51.07626343 W  
 SF01 100.6479773 MHz

==== CHANNEL f2 =====  
 CPDPRG2 waltz16  
 NUC2 1H  
 PCPD2 75.00 usec  
 PL2 -1.00 dB  
 PL12 13.39 dB  
 PL13 20.00 dB  
 PL12W 11.09959412 W  
 PL12W 0.40393090 W  
 PL13W 0.08816721 W  
 SF02 400.2316009 MHz  
 SI 32768  
 SF 100.6379201 MHz  
 WDW EM  
 SSB 0  
 LB 1.00 Hz  
 GB 0  
 PC 1.40

174.13  
 144.15  
 140.31  
 137.76  
 137.34  
 134.92  
 132.97  
 132.55  
 131.47  
 130.81  
 130.37  
 130.33  
 129.69  
 129.20  
 128.03  
 126.54  
 124.93  
 123.69  
 120.32  
 118.65  
 115.34  
 72.95

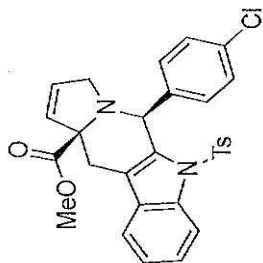

syn-7{5}

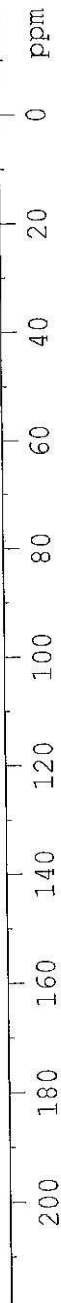

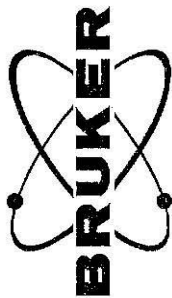

NAME JRG-348-53bre  
 EXPNO 1  
 PROCNO 1  
 Date\_ 20110727  
 Time\_ 15.44  
 INSTRUM spect  
 PROBHD 5 mm PABBO BB-  
 PULPROG zg30  
 TD 65536  
 SOLVENT CDCl3  
 NS 5  
 DS 2  
 SWH 8223.685 Hz  
 FIDRES 0.125483 Hz  
 AQ 3.9846387 sec  
 RG 71.8  
 DW 60.800 usec  
 DE 6.50 usec  
 TE 294.9 K  
 D1 2.00000000 sec  
 TDO 1

===== CHANNEL f1 =====  
 NUC1 1H  
 P1 14.31 usec  
 PL1 -1.00 dB  
 PL1W 11.09959412 W  
 SF01 400.2324716 MHz  
 SI 32768  
 SF 400.2300000 MHz  
 WDW EM  
 SSB 0  
 LB 0.30 Hz  
 GB 0  
 PC 1.00

2.341  
2.865  
2.867  
2.906  
2.909  
3.161  
3.563  
3.604  
3.618  
3.765  
3.793  
3.799  
3.804  
4.272  
4.306  
5.758  
5.773  
5.919  
5.930  
5.934  
5.945  
6.924  
6.945  
7.047  
7.067  
7.095  
7.099  
7.116  
7.292  
7.328  
7.331  
7.347  
7.349  
7.365  
7.368  
7.395  
7.402  
7.419  
7.423  
7.523  
7.525  
7.543  
8.236  
8.257

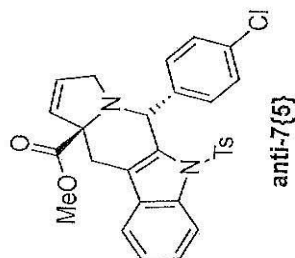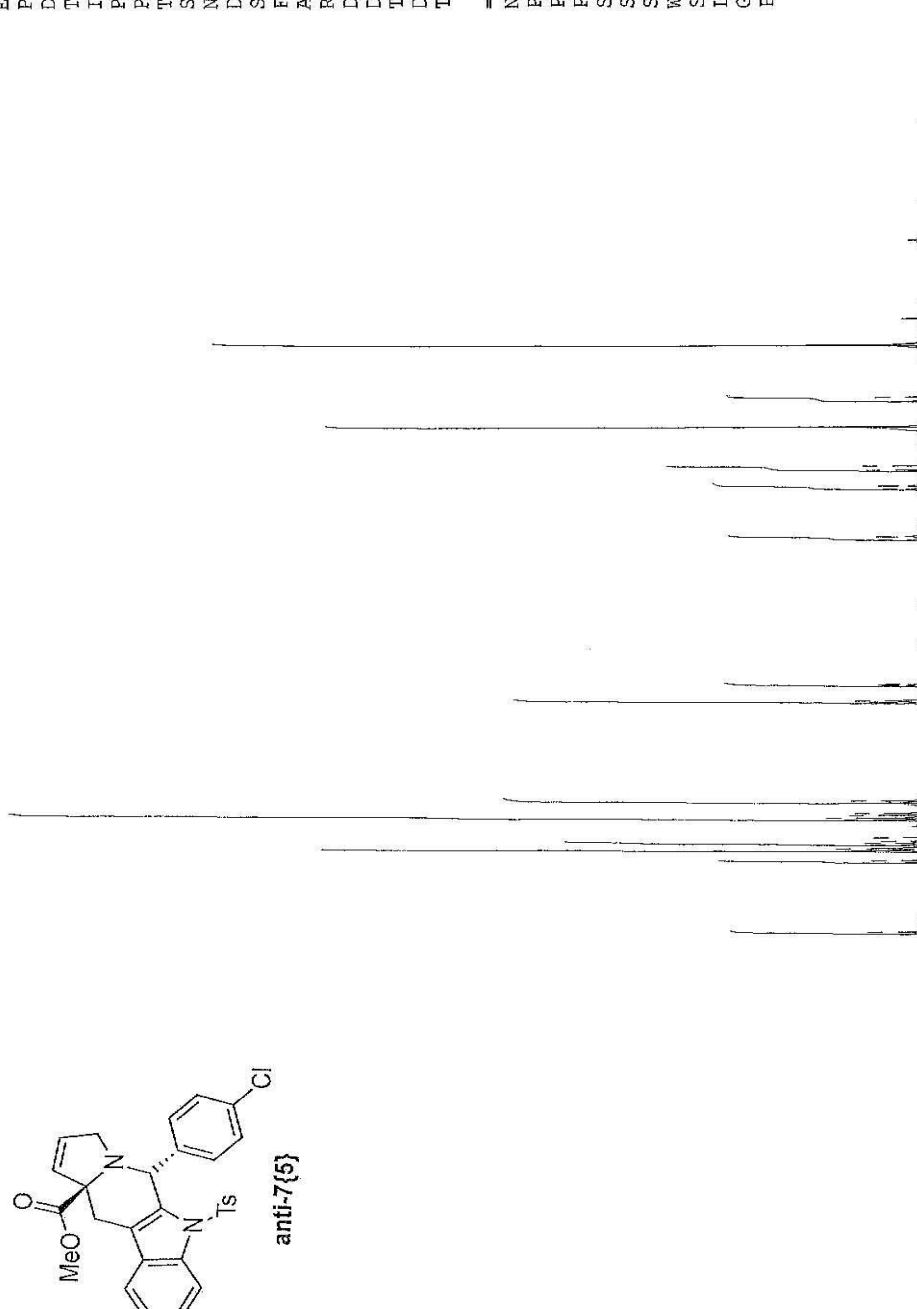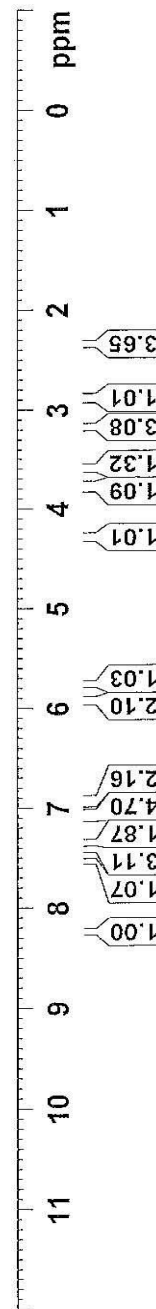

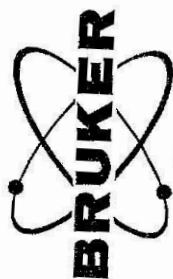

NAME JRG-348-53bre  
 EXPNO 2  
 PROCNO 1  
 Date\_ 20110727  
 Time\_ 15.59  
 INSTRUM spect  
 PROBD 5 mm PABBO BB-  
 PULPROG zgpg30  
 TD 65536  
 SOLVENT CDCl3  
 NS 177  
 DS 4  
 SWH 24038.461 Hz  
 FIDRES 0.366798 Hz  
 AQ 1.3631988 sec  
 RG 203  
 DW 20.800 usec  
 DE 6.50 usec  
 TE 295.4 K  
 D1 3.00000000 sec  
 D11 0.03000000 sec  
 TD0 1

CHANNEL f1  
 NUC1 13C  
 P1 10.00 usec  
 PL1 -1.59 dB  
 PL1W 51.07626343 W  
 SFO1 100.6479773 MHz

CHANNEL f2  
 CPDPRG2 waltz16  
 NUC2 1H  
 PCPD2 75.00 usec  
 PL2 -1.00 dB  
 PL12 13.39 dB  
 PL13 20.00 dB  
 PL2W 11.09959412 W  
 PL12W 0.40393090 W  
 PL13W 0.08816721 W  
 SFO2 400.2316009 MHz  
 SI 32768  
 SF 100.6379203 MHz  
 WDW EM  
 SSB 0  
 GB 1.00 Hz  
 PC 1.40

174.50  
 144.70  
 138.29  
 136.64  
 135.69  
 133.79  
 133.41  
 132.82  
 129.80  
 129.47  
 129.18  
 128.41  
 128.27  
 127.87  
 126.31  
 124.95  
 123.53  
 118.66  
 118.33  
 114.62  
 69.47  
 60.12  
 58.12  
 52.13  
 27.09  
 21.47

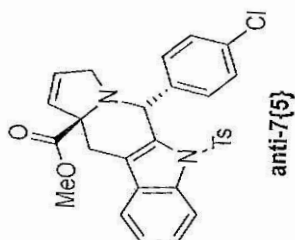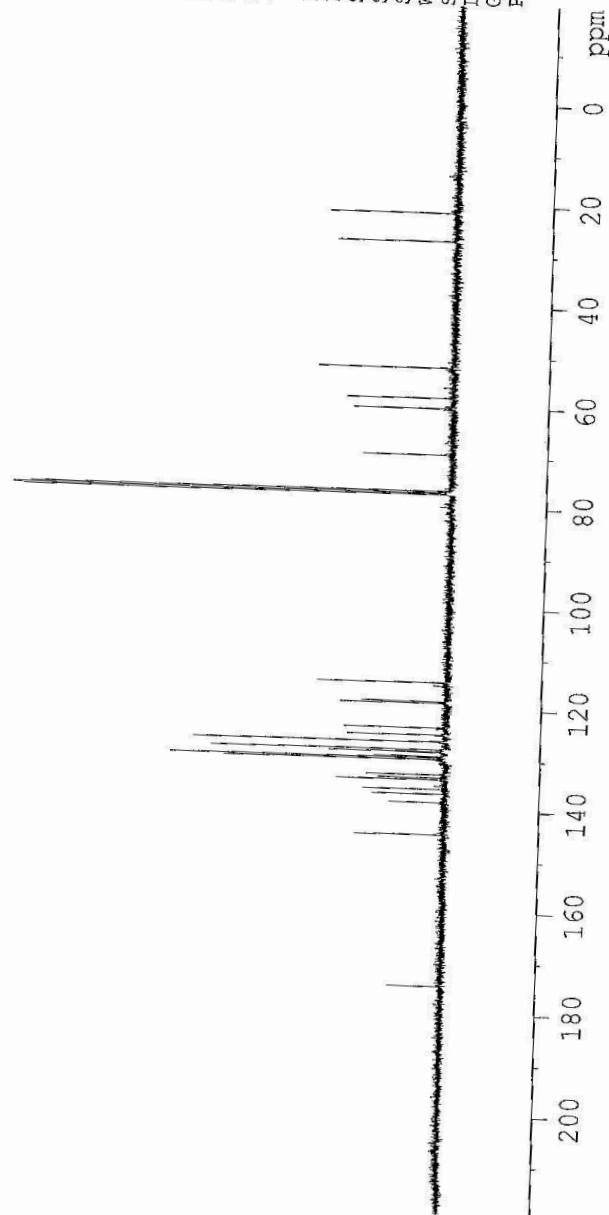

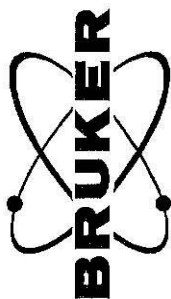

NAME JRG-329-77a\_0day

EXPNO 1

PROCNO 1

Date\_ 20110427

Time\_ 15.59

INSTRUM spect

PROBHD 5 mm Dual 13C/

PULPROG zg30

TD 32768

SOLVENT CDCl3

NS 16

DS 2

SWH 6172.839 Hz

FIDRES 0.188380 Hz

AQ 2.6542580 sec

RG 645.1

DW 81.000 usec

DE 6.50 usec

TE 300.0 K

DL 1.00000000 sec

TD0 1

===== CHANNEL f1 =====

NUC1 1H

P1 6.20 usec

PL1 4.00 dB

SFO1 300.1418535 MHz

SI 32768

SF 300.1400000 MHz

WDW EM

SSB 0

LB 0.30 Hz

GB 0

PC 1.00

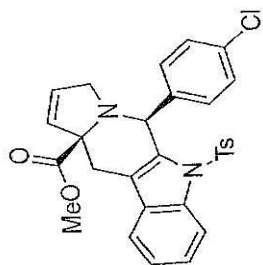

syn-7{5}  
Day 0

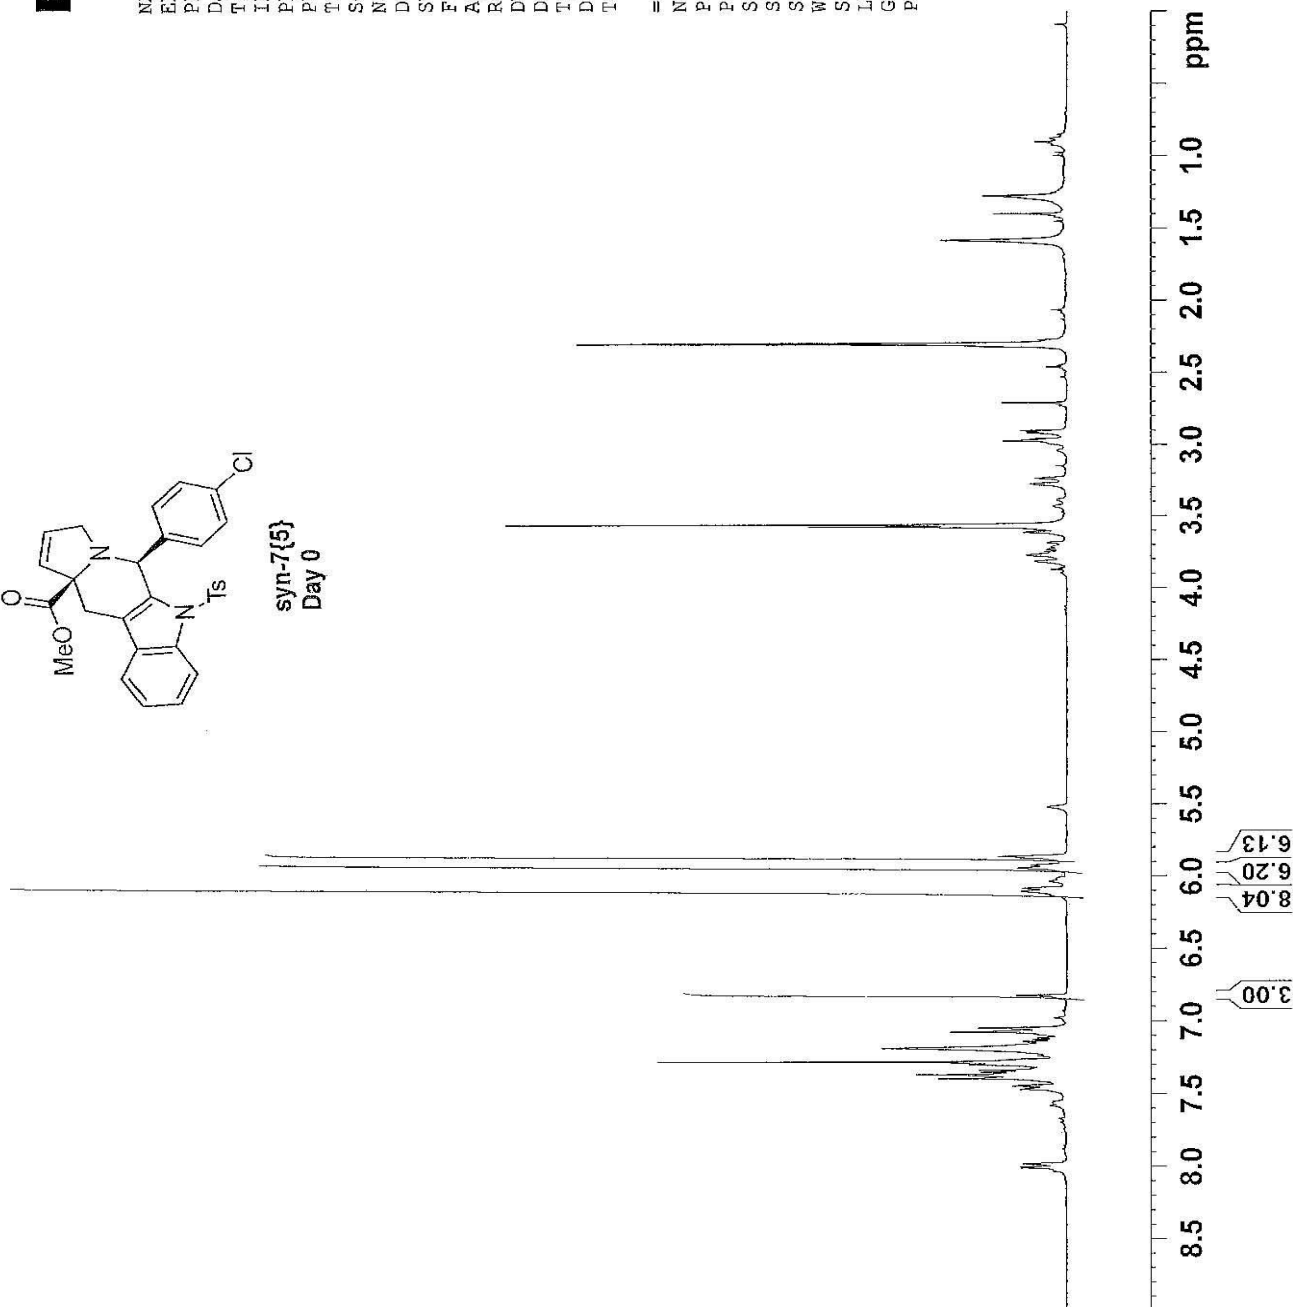



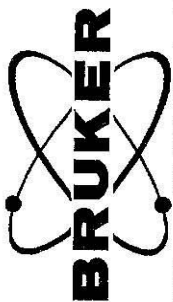

JRG-329-77b-air\_14day

NAME  
EXPNO 1  
PROCNO 1  
Date\_ 20110512  
Time\_ 8.26  
INSTRUM spect  
PROBHD 5 mm Multinucl  
PULPROG zg30  
TD 32768  
SOLVENT CDCl3  
NS 16  
DS 2  
SWH 6188.119 Hz  
FIDRES 0.188845 Hz  
AQ 2.6477044 sec  
RG 161  
DW 80.800 usec  
DE 6.50 usec  
TE 295.3 K  
D1 1.00000000 sec  
TD0 1

===== CHANNEL f1 =====  
NUC1 1H  
P1 13.20 usec  
PL1 -2.00 dB  
PL1W 18.20942116 W  
SFO1 300.2318540 MHz  
SI 32768  
SF 300.2300000 MHz  
WDW EM  
SSB 0  
LB 0.10 Hz  
GB 0  
PC 1.00

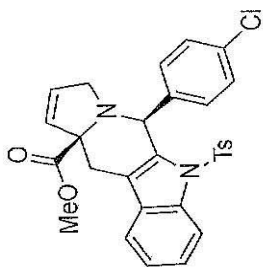

syn-7{5}  
Day 14

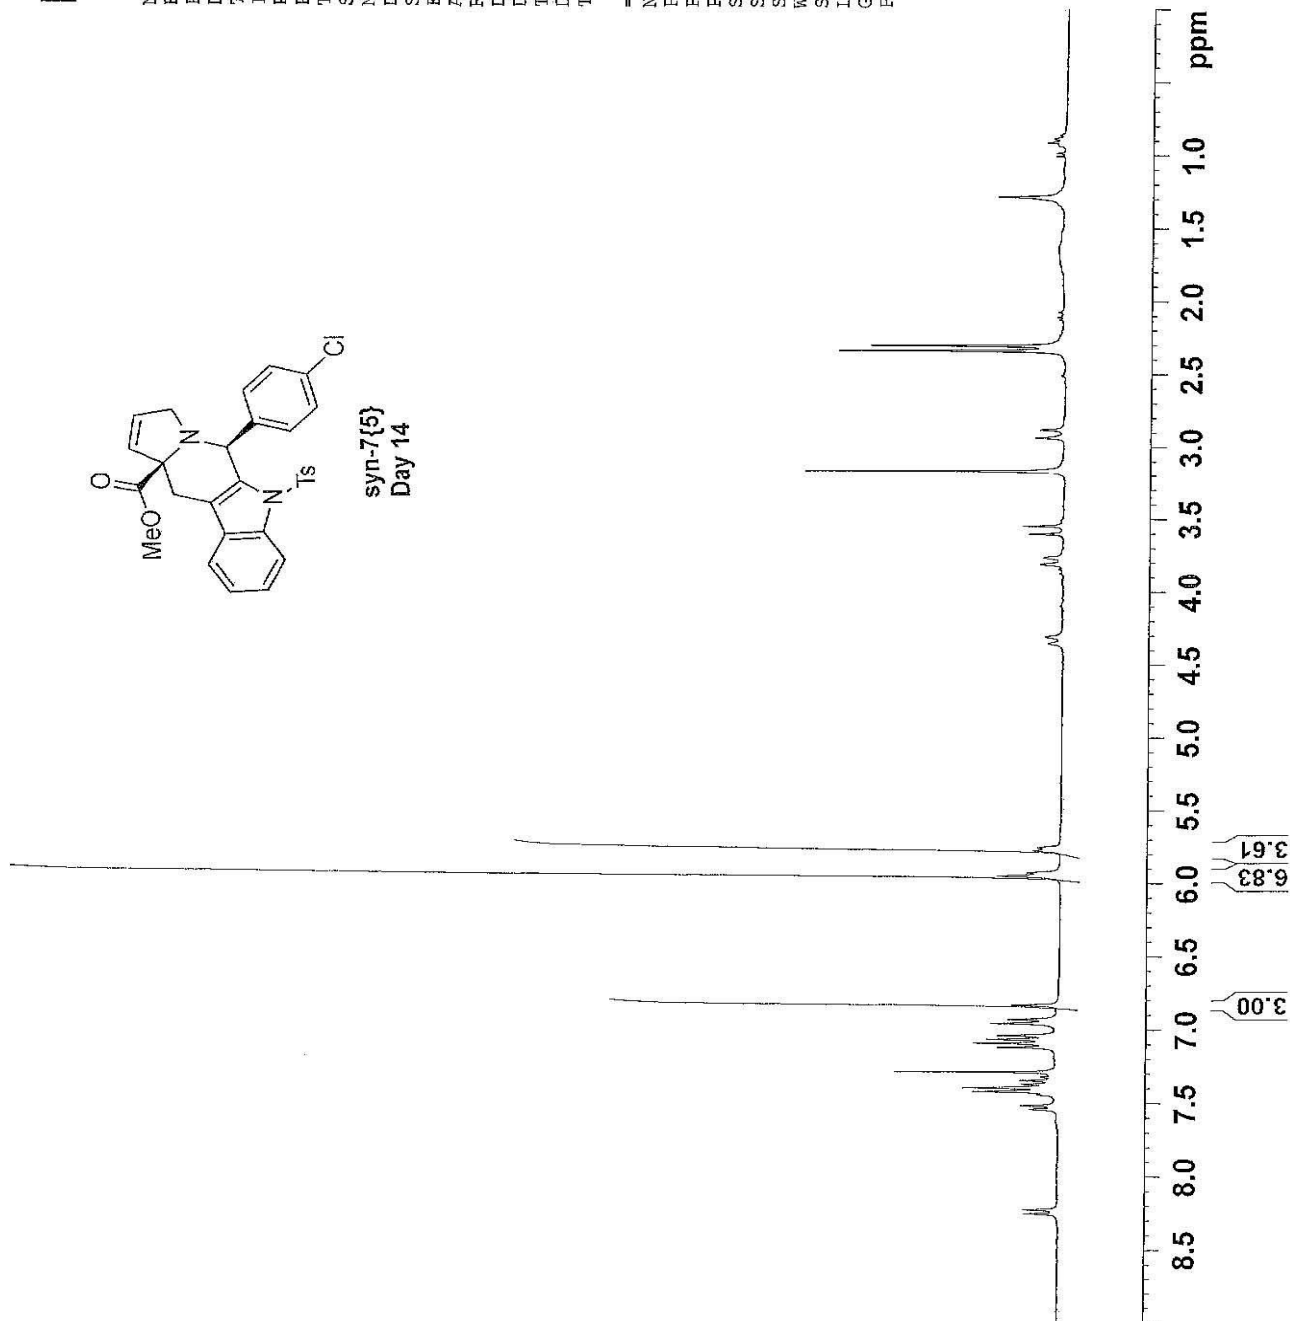

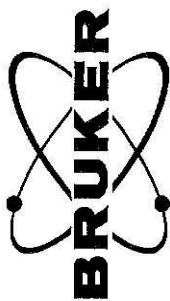

JRG-329-77b\_air\_21day

NAME  
EXPNO 1  
PROCNO 1  
Date\_ 20110519  
Time\_ 7.53  
INSTRUM spect  
PROBHD 5 mm Multinucl  
PULPROG zg30  
TD 32768  
SOLVENT CDCl3  
NS 16  
DS 2  
SWH 6188.119 Hz  
FIDRES 0.188846 Hz  
AQ 2.6477044 sec  
RG 181  
DW 80.800 usec  
DE 6.50 usec  
TE 294.2 K  
D1 1.0000000 sec  
TD0 1

===== CHANNEL f1 =====  
NUC1 1H  
P1 13.20 usec  
PL1 -2.00 dB  
PL1W 18.20942116 W  
SFO1 300.2318540 MHz  
SI 32768  
SF 300.2300000 MHz  
WDW EM  
SSB 0  
LB 0.10 Hz  
GB 0  
PC 1.00

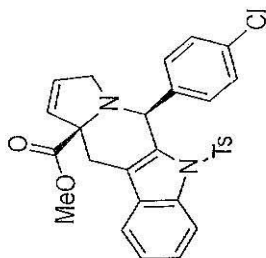

syn-7{5}  
Day 21

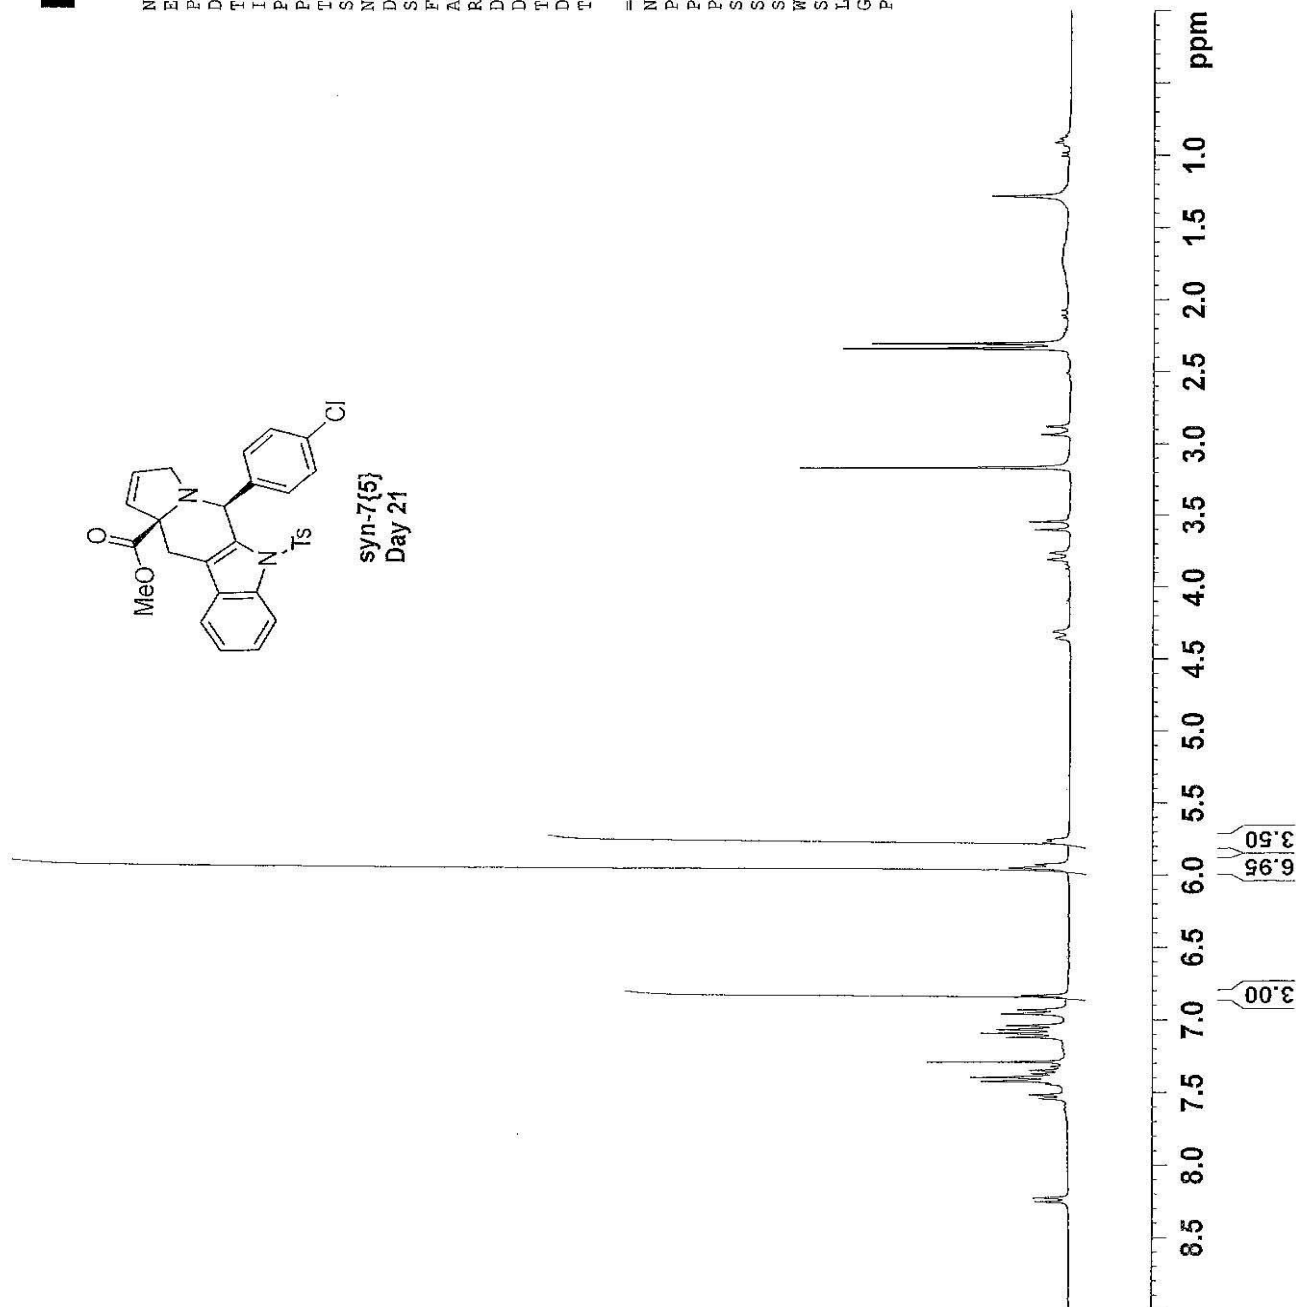

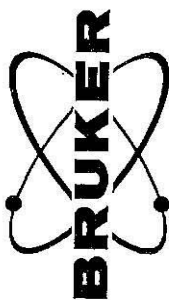

JRG-329-77b\_std\_0day\_A

NAME  
EXPNO 1  
PROCNO 1  
Date\_ 20110427  
Time\_ 16.07  
INSTRUM spect  
PROBHD 5 mm Dual 13C/  
PULPROG zg30  
TD 32768  
SOLVENT CDCl3  
NS 16  
DS 2  
SWH 6172.839 Hz  
FIDRES 0.188380 Hz  
AQ 2.6542580 sec  
RG 812.7  
DW 81.000 usec  
DE 6.50 usec  
TE 300.0 K  
D1 1.00000000 sec  
TD0 1

===== CHANNEL f1 =====  
NUC1 1H  
P1 6.20 usec  
PL1 4.00 dB  
SFO1 300.1418535 MHz  
SI 32768  
SF 300.1400000 MHz  
WDW EM  
SSB 0  
LB 0.30 Hz  
GB 0  
PC 1.00

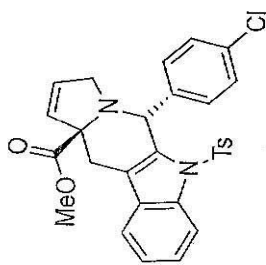

anti-7{5}  
Day 0

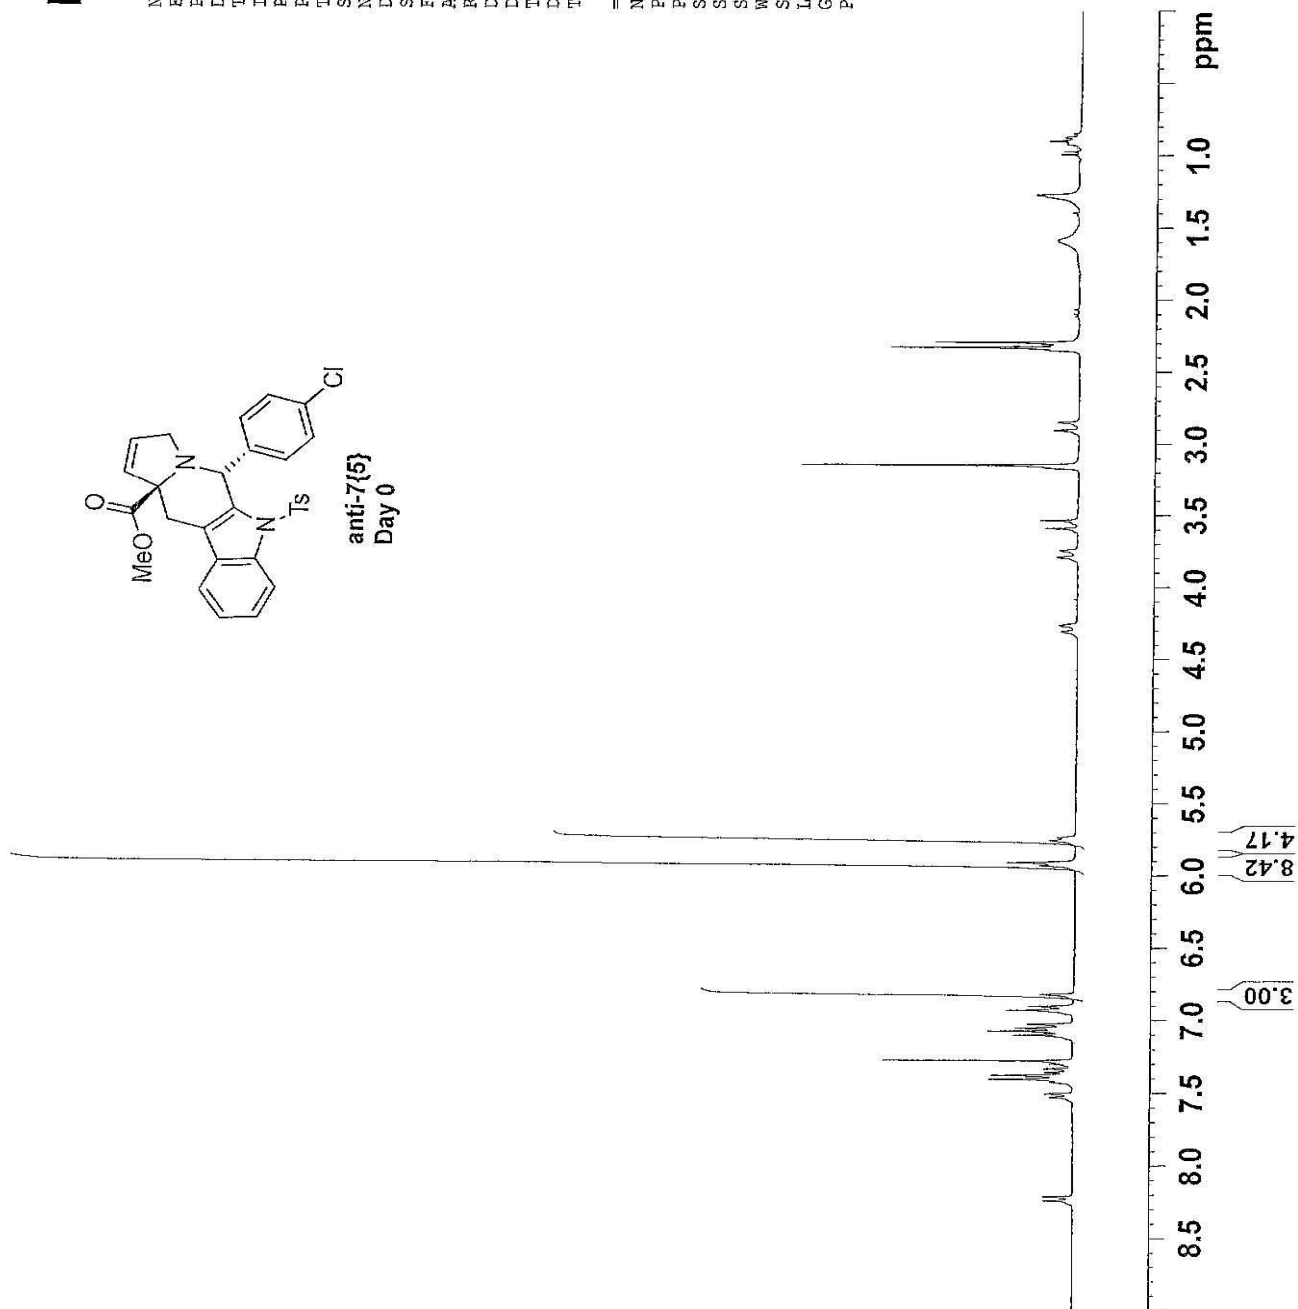

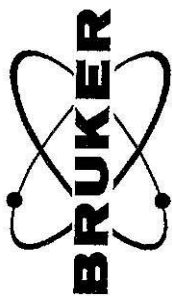

JRG-329-77a\_air\_14day

NAME  
EXPNO 1  
PROCNO 1  
Date 20110512  
Time 8.18  
INSTRUM spect  
PROBHD 5 mm Multinucl  
PULPROG zg30  
TD 32768  
SOLVENT CDCl3  
NS 16  
DS 2  
SWH 6188.119 Hz  
FIDRES 0.188846 Hz  
AQ 2.6477044 sec  
RG 161  
DW 80.800 usec  
DE 6.50 usec  
TE 295.0 K  
D1 1.00000000 sec  
TD0 1

===== CHANNEL f1 =====  
NUC1 1H  
P1 13.20 usec  
PL1 -2.00 dB  
PL1W 18.20942116 W  
SFO1 300.2318540 MHz  
SI 32768  
SF 300.2300000 MHz  
WDW EM  
SSB 0  
LB 0.10 Hz  
GB 0  
PC 1.00

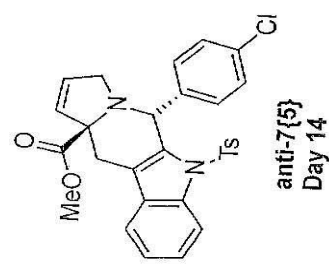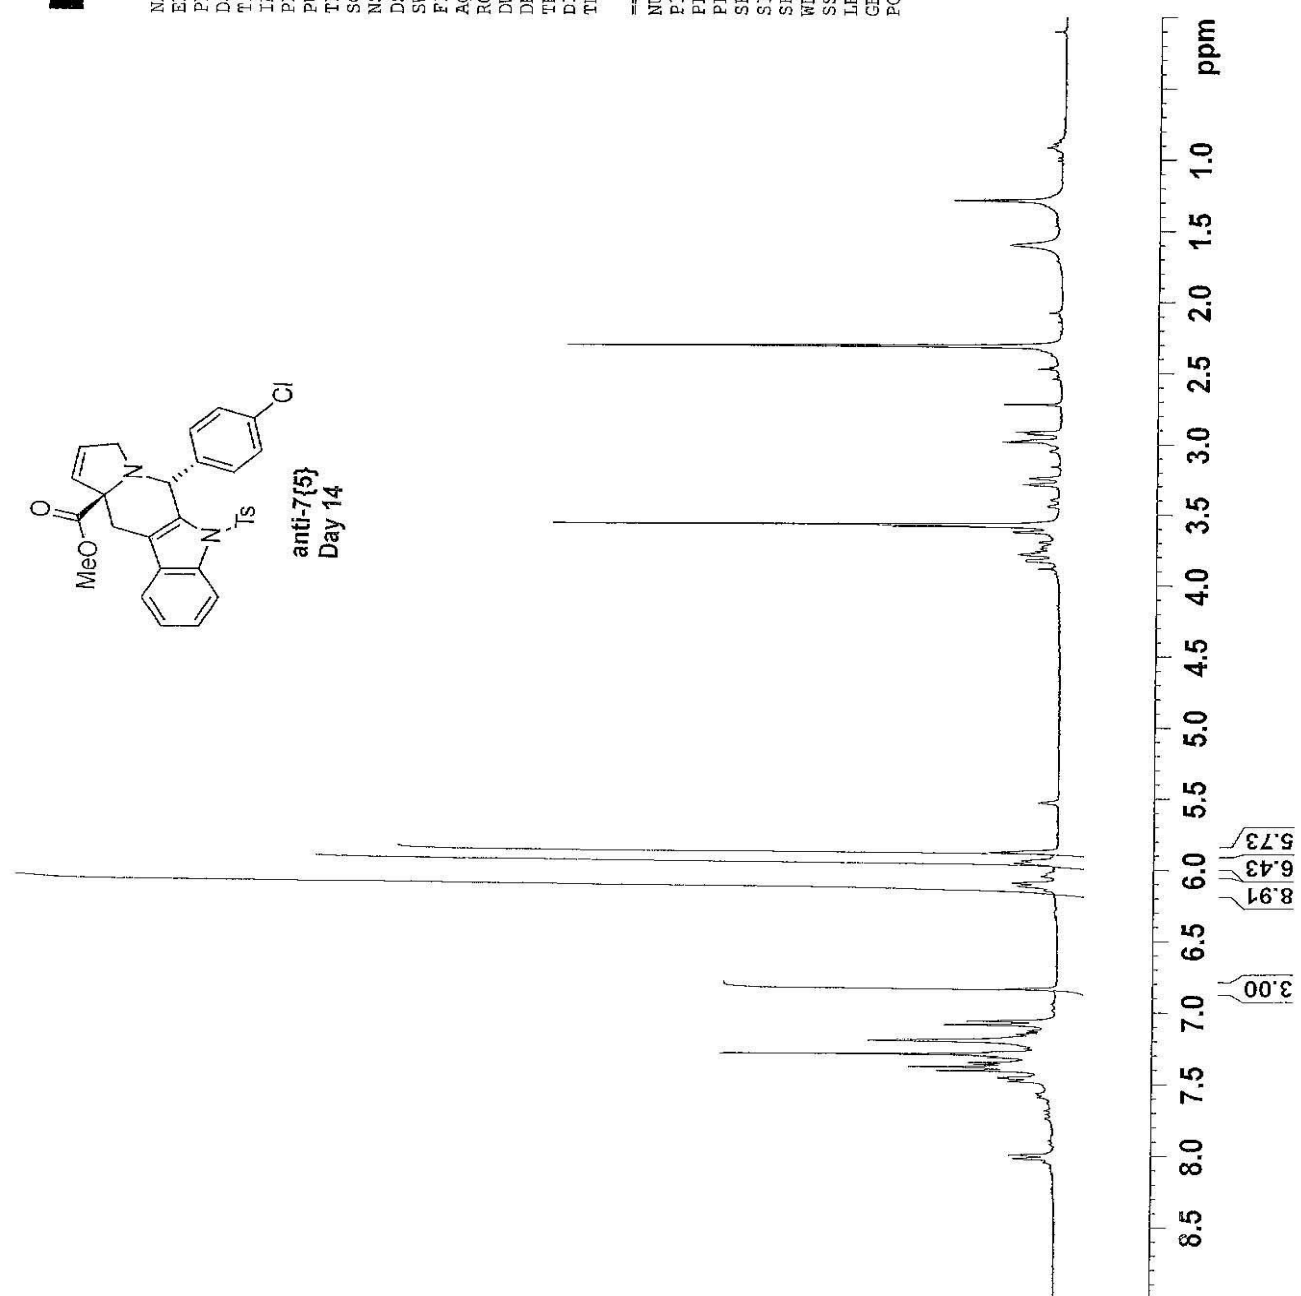

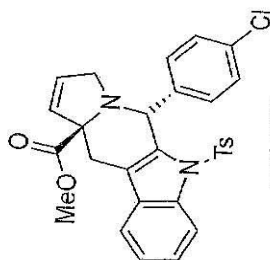

anti-7{5}  
Day 21

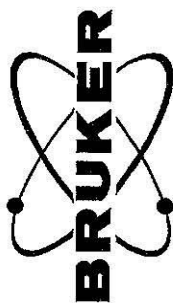

JRG-329-77a air\_21day

NAME  
EXPNO 1  
PROCNO 1  
Date\_ 20110519  
Time\_ 8.01  
INSTRUM spect  
PROBHD 5 mm Multinucl  
PULPROG zg30  
TD 32768  
SOLVENT CDCl3  
NS 16  
DS 2  
SWH 6188.119 Hz  
FIDRES 0.188846 Hz  
AQ 2.6477044 sec  
RG 161  
DW 80.800 usec  
DE 6.50 usec  
TE 294.3 K  
D1 1.00000000 sec  
TD0 1

===== CHANNEL f1 =====  
NUC1 1H  
P1 13.20 usec  
PL1 -2.00 dB  
PL1W 18.20942116 W  
SFO1 300.2318540 MHz  
SI 32768  
SF 300.2300000 MHz  
WDW EM  
SSB 0  
LB 0.10 Hz  
GB 0  
PC 1.00

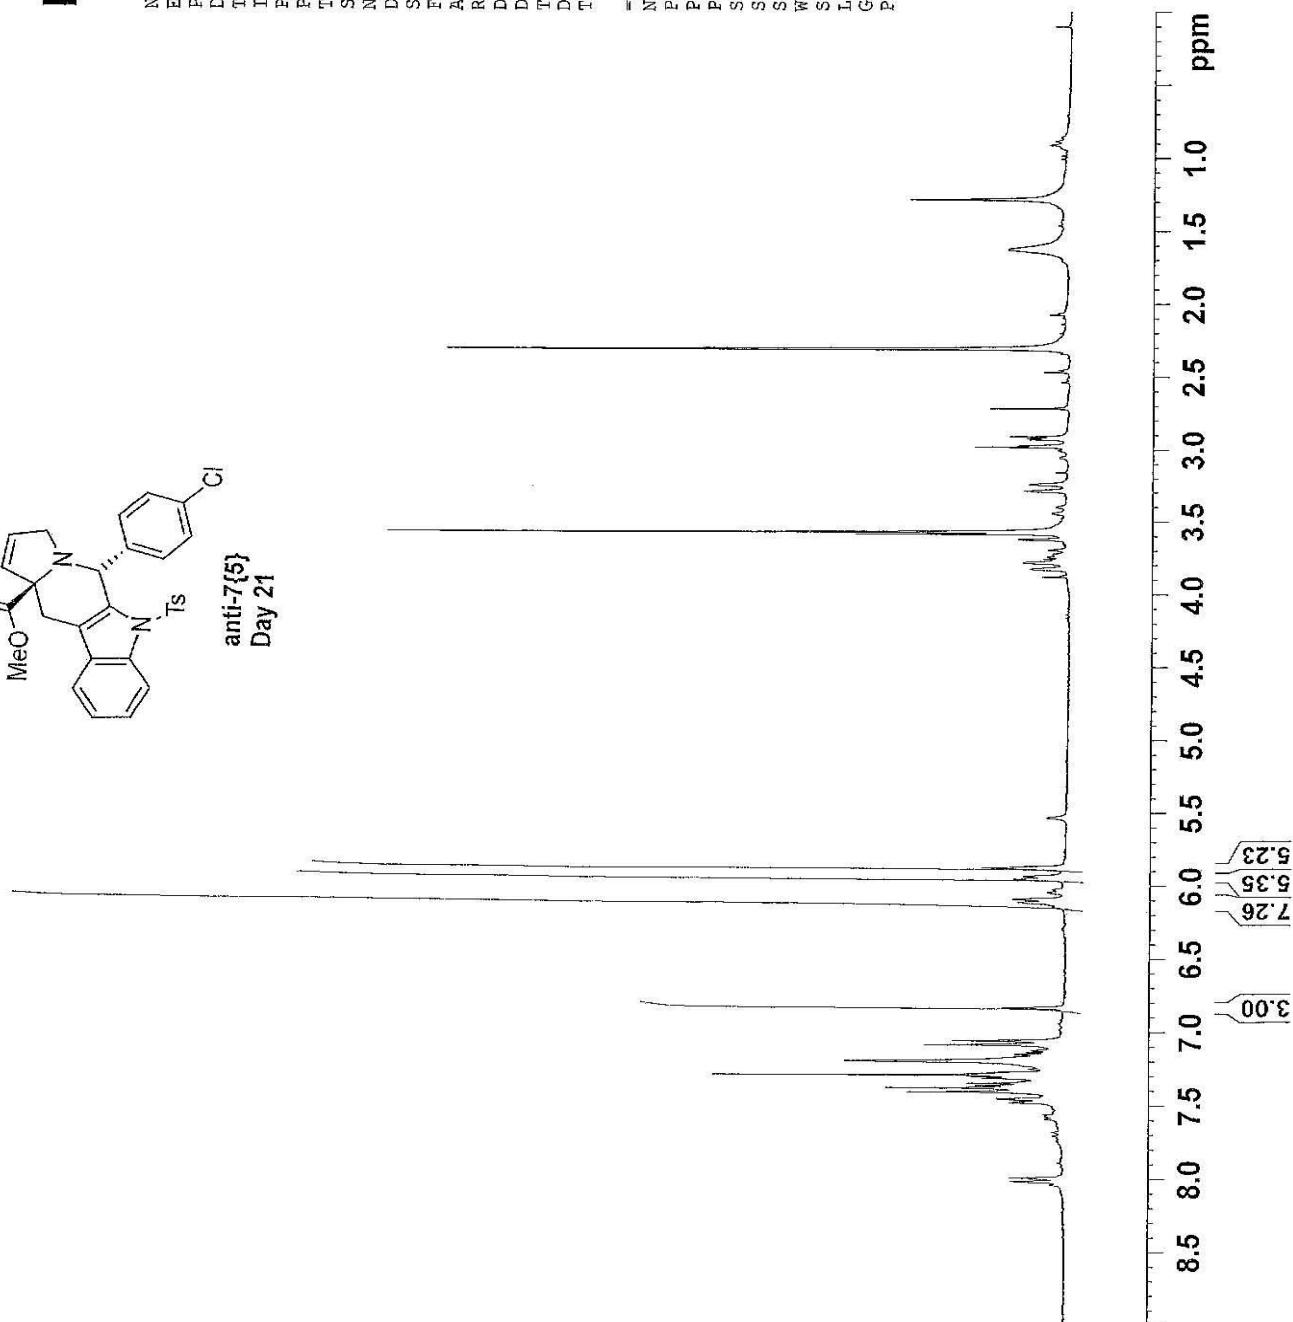

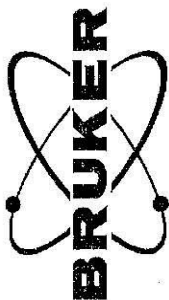

NAME JRG-348-47are  
 EXPNO 1  
 PROCNO 1  
 Date\_ 20110727  
 Time\_ 4.29  
 INSTRUM spect  
 PROBHD 5 mm PABBO BB-  
 PULPROG zg30  
 TD 65536  
 SOLVENT CDCl3  
 NS 7  
 DS 2  
 SWH 8223.685 Hz  
 FIDRES 0.125483 Hz  
 AQ 3.9846387 sec  
 RG 128  
 DW 60.800 usec  
 DE 6.50 usec  
 TE 295.2 K  
 D1 2.00000000 sec  
 D1 1  
 TD0 1

===== CHANNEL f1 =====  
 NUC1 1H  
 P1 14.31 usec  
 PL1 -1.00 dB  
 PL1W 11.09959412 W  
 SFO1 400.2324716 MHz  
 SI 32768  
 SF 400.2300000 MHz  
 WDW EM  
 SSB 0  
 LB 0.30 Hz  
 GB 0  
 PC 1.00

8.021  
8.017  
8.004  
7.999  
7.499  
7.481  
7.478  
7.407  
7.386  
7.328  
7.324  
7.313  
7.309  
7.309  
7.304  
7.292  
7.072  
7.051  
6.110  
6.109  
6.099  
6.095  
6.094  
6.090  
5.981  
5.972  
5.967  
5.966  
5.961  
5.952  
5.848  
5.815  
3.646  
3.641  
3.608  
3.603  
3.579  
3.243  
3.211  
3.005  
2.999  
2.968  
2.961  
2.996

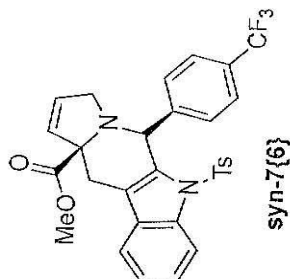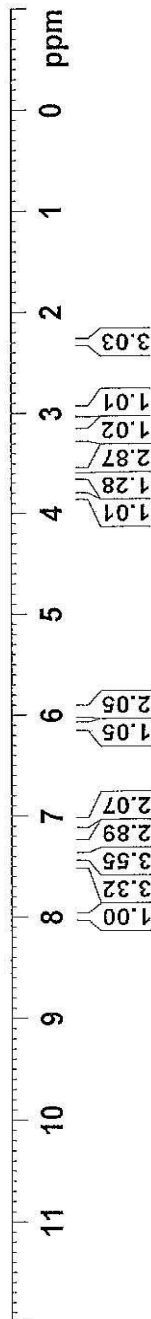

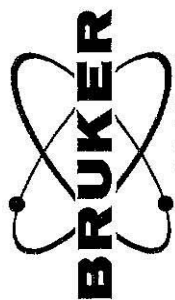

NAME JRG-348-47are  
 EXPNO 2  
 PROCNO 1  
 Date\_ 20110727  
 Time 5.28  
 INSTRUM spect  
 PROBHD 5 mm PABBO BB-  
 PULPROG zgpg30  
 TD 65536  
 SOLVENT CDCl3  
 NS 775  
 DS 4  
 SWH 24038.461 Hz  
 FIDRES 0.366798 Hz  
 AQ 1.3631988 sec  
 RG 203  
 DW 20.800 usec  
 DE 6.50 usec  
 TE 295.5 K  
 D1 3.00000000 sec  
 D11 0.03000000 sec  
 TD0 1

==== CHANNEL f1 =====  
 NUC1 13C  
 P1 10.00 usec  
 PL1 -1.59 dB  
 PL1W 51.07626343 W  
 SF01 100.6479773 MHz

==== CHANNEL f2 =====  
 CPDPRG2 waltz16  
 NUC2 1H  
 PCPD2 75.00 usec  
 PL2 -1.00 dB  
 PL12 13.39 dB  
 PL13 20.00 dB  
 PL2W 11.09959412 W  
 PL12W 0.40393090 W  
 PL13W 0.08816721 W  
 SF02 400.2316009 MHz  
 SI 32768  
 SF 100.6379189 MHz  
 WDW EM  
 SSB 0  
 LB 1.00 Hz  
 GB 0  
 PC 1.40

174.04  
 145.82  
 144.26  
 137.75  
 136.90  
 134.86  
 132.50  
 130.30  
 129.82  
 129.65  
 129.56  
 129.24  
 126.52  
 125.06  
 124.88  
 124.84  
 123.77  
 120.54  
 118.73  
 115.35  
 73.03  
 60.13  
 54.61  
 51.80  
 30.61  
 21.41

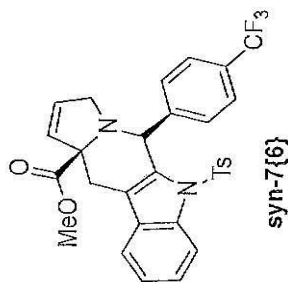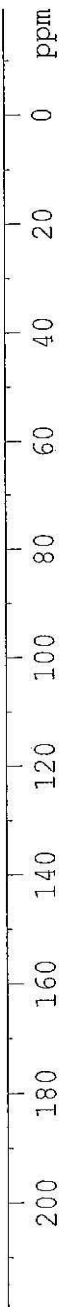

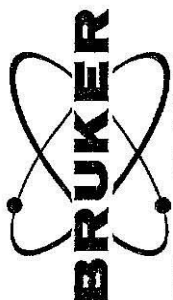

NAME JRG-348-47bre

EXPNO 1

PROCNO 1

Date\_ 20110727

Time\_ 4.16

INSTRUM spect

PROBHD 5 mm PABBO BB-

PULPROG zg30

TD 65536

SOLVENT CDCl3

NS 5

DS 2

SWH 8223.685 Hz

FIDRES 0.125483 Hz

AQ 3.9846387 sec

RG 90.5

DW 60.800 usec

DE 6.50 usec

TE 294.9 K

D1 2.0000000 sec

TD0 1

===== CHANNEL f1 =====

NUC1 1H

P1 14.31 usec

PL1 -1.00 dB

PL1W 11.09959412 W

SFO1 400.2324716 MHz

SI 32768

SF 400.2300000 MHz

WDW EM

SSB 0

LB 0.30 Hz

GB 0

PC 1.00

8.272  
8.251  
8.251  
7.563  
7.545  
7.544  
7.437  
7.435  
7.417  
7.414  
7.399  
7.395  
7.383  
7.378  
7.374  
7.367  
7.365  
7.292  
7.120  
7.099  
7.031  
7.010  
5.992  
5.969  
5.958  
5.954  
5.949  
5.790  
5.785  
5.775  
4.344  
4.315  
4.310  
3.870  
3.865  
3.860  
3.832  
3.647  
3.605  
3.054  
2.915  
2.912  
2.873  
2.871  
2.813

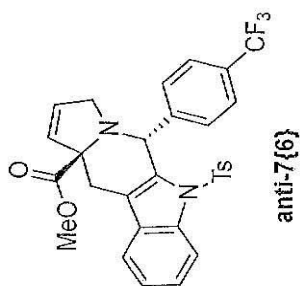

anti-7{6}

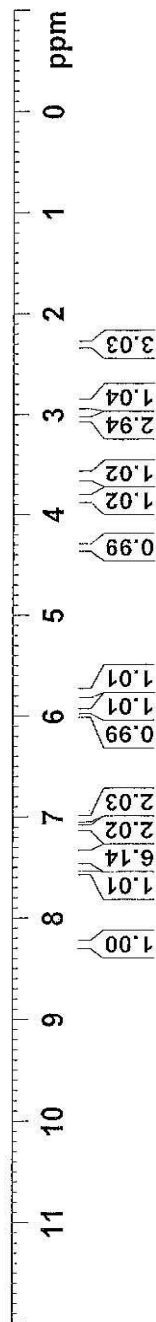



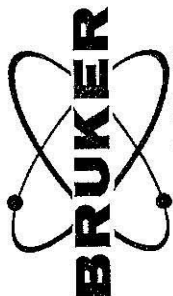

NAME JRG-348-47bre

EXPNO 2

PROCNO 1

Date\_ 20110727

Time 4.23

INSTRUM spect

PROBHD 5 mm PABBO BB-

PULPROG zgpg30

TD 65536

SOLVENT CDCl3

NS 67

DS 4

SWH 24038.461 Hz

FIDRES 0.366798 Hz

AQ 1.3631988 sec

RG 203

DW 20.800 usec

DE 6.50 usec

TE 295.5 K

D1 3.00000000 sec

D11 0.03000000 sec

TD0 1

===== CHANNEL f1 =====

NUC1 13C

P1 10.00 usec

PL1 -1.59 dB

PL1W 51.07626343 W

SFO1 100.6479773 MHz

===== CHANNEL f2 =====

CPDPRG2 waltz16

NUC2 1H

PCPD2 75.00 usec

PL2 -1.00 dB

PL12 13.39 dB

PL13 20.00 dB

PL2W 11.09959412 W

PL12W 0.40393090 W

PL13W 0.08816721 W

SFO2 400.2316009 MHz

SI 32768

SF 100.6379199 MHz

WDW EM

SSB 0

LB 1.00 Hz

GB 0

PC 1.40

21.36  
27.09

51.96  
58.30  
60.16  
69.30

114.65  
118.58  
118.75  
123.62  
124.66  
124.69  
125.12  
126.19  
128.24  
128.68  
129.13  
129.27  
129.48  
132.73  
133.74  
135.70  
136.76  
143.77  
144.72  
174.34

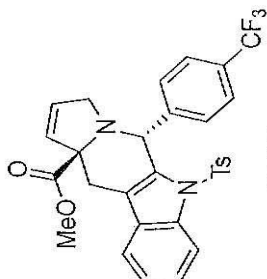

anti-7{6}

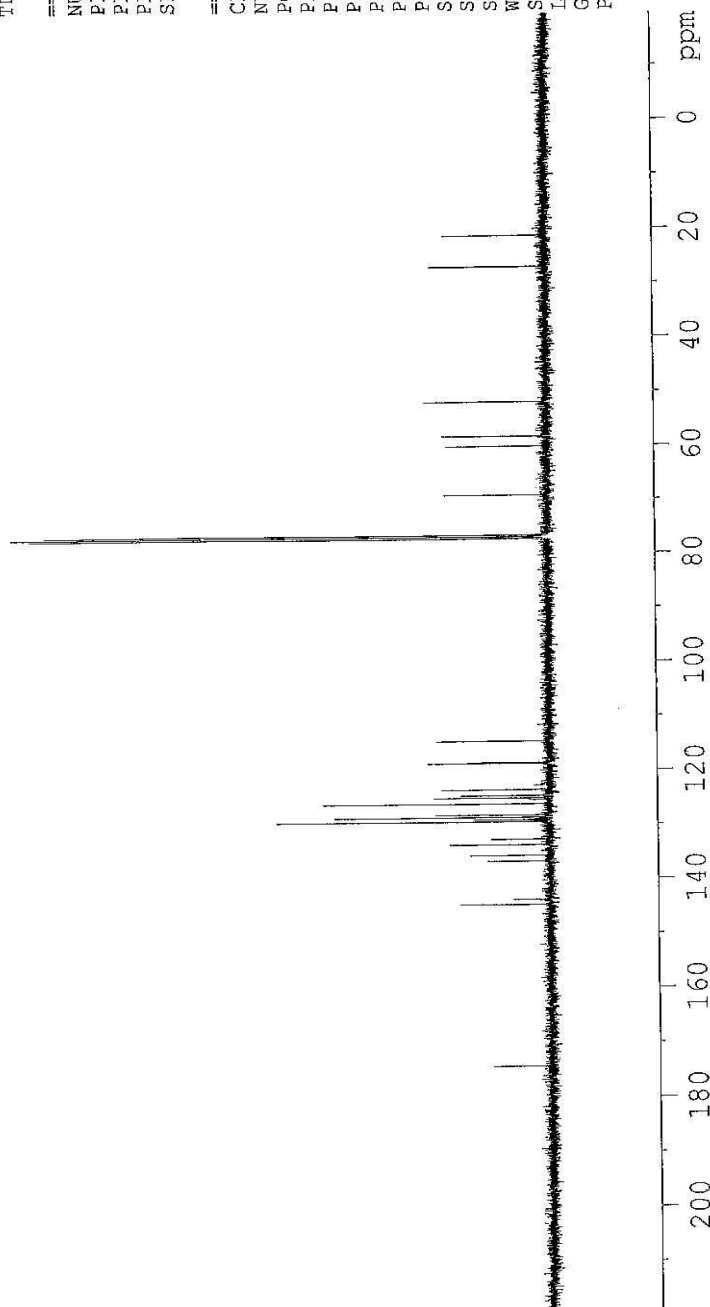

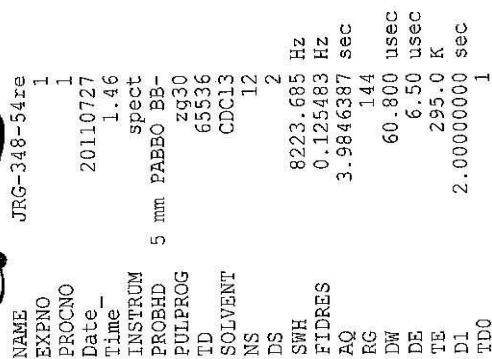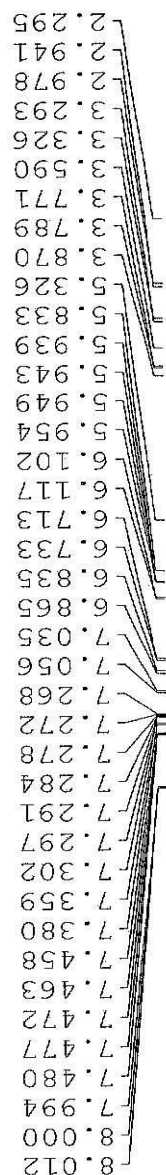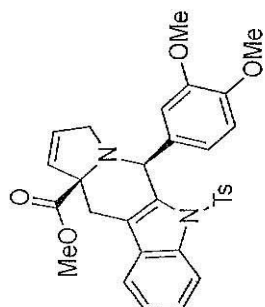

syn-7{7}

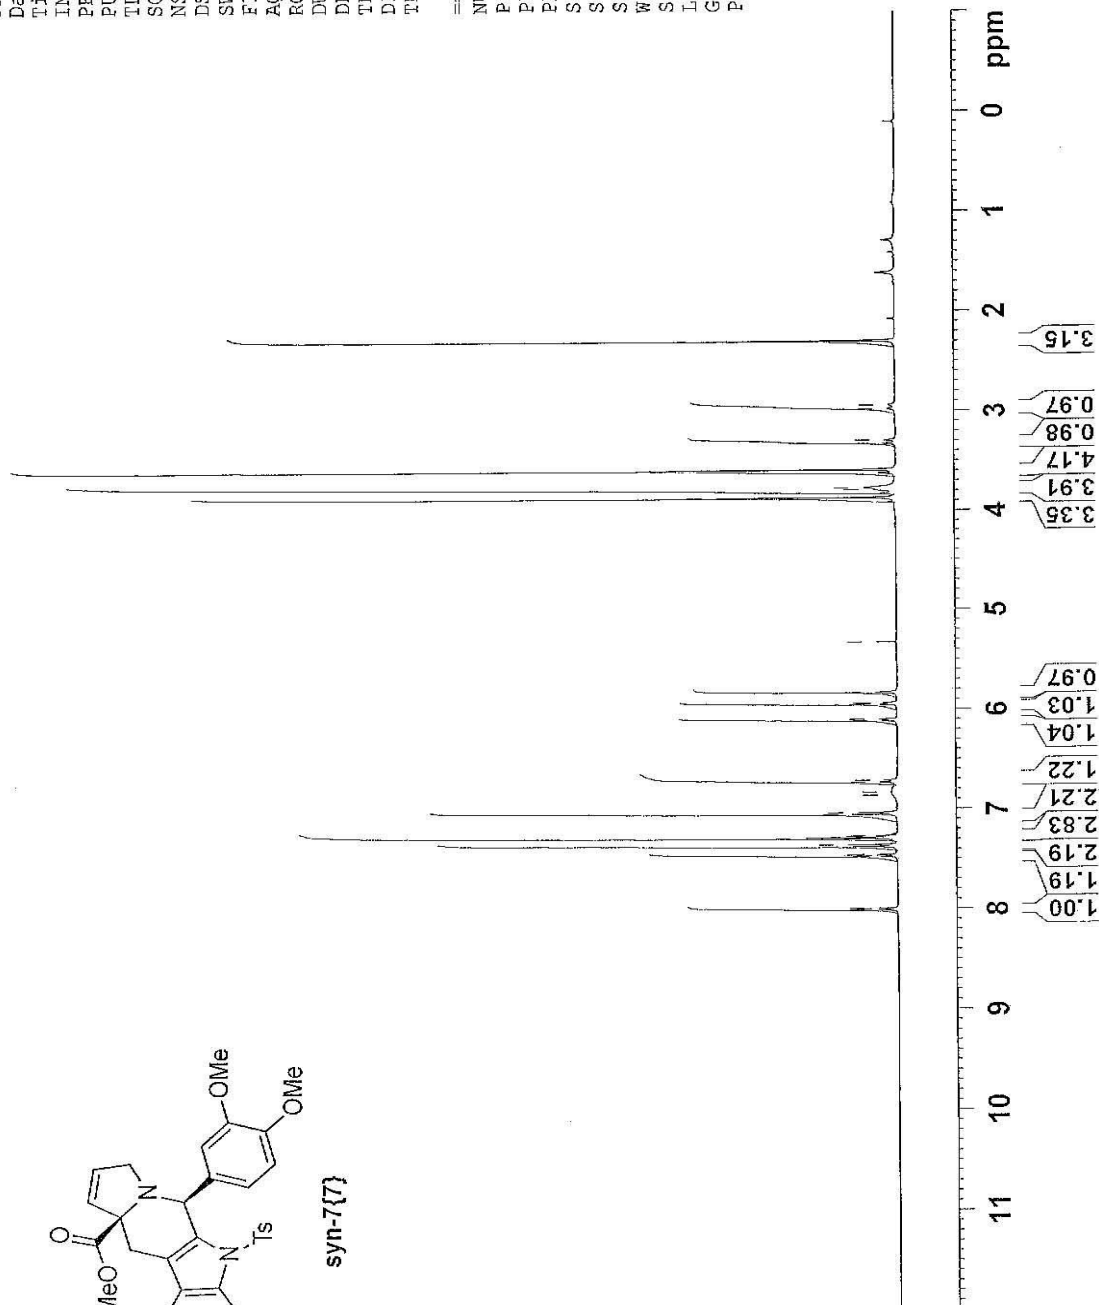

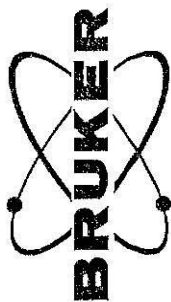

NAME JRG-348--54re  
 EXPNO 2  
 PROCNO 1  
 Date\_ 20110727  
 Time 3.04  
 INSTRUM spect  
 PROBHD 5 mm PABBO BB-  
 PULPROG zgpg30  
 TD 65536  
 SOLVENT CDCl3  
 NS 1024  
 DS 4  
 SWH 24038.461 Hz  
 FIDRES 0.366798 Hz  
 AQ 1.3631988 sec  
 RG 203  
 DW 20.800 usec  
 DE 6.50 usec  
 TE 295.5 K  
 D1 3.00000000 sec  
 D11 0.03000000 sec  
 TD0 1

===== CHANNEL f1 =====  
 NUC1 13C  
 P1 10.00 usec  
 PL1 -1.59 dB  
 PL1W 51.07626343 W  
 SFO1 100.6479773 MHz

===== CHANNEL f2 =====  
 CPDPRG2 waltz16  
 NUC2 1H  
 PCPD2 75.00 usec  
 PL2 -1.00 dB  
 PL12 13.39 dB  
 PL13 20.00 dB  
 PL2W 11.09959412 W  
 PL12W 0.40393090 W  
 PL13W 0.08816721 W  
 SFO2 400.2316009 MHz  
 SI 32768  
 SE 100.6379206 MHz  
 WDW EM  
 SSB 0  
 LB 1.00 Hz  
 GB 0  
 PC 1.40

174.35  
 148.24  
 148.11  
 143.88  
 138.09  
 137.73  
 135.19  
 134.25  
 132.67  
 130.34  
 129.75  
 129.04  
 126.51  
 124.68  
 123.49  
 119.73  
 118.56  
 115.28  
 110.39  
 72.97  
 60.08  
 55.80  
 55.70  
 54.74  
 51.71  
 30.68  
 21.41

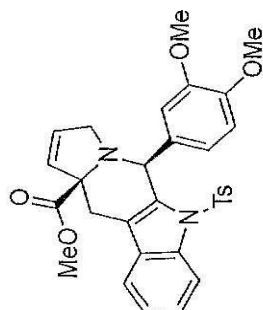

syn-7{7}

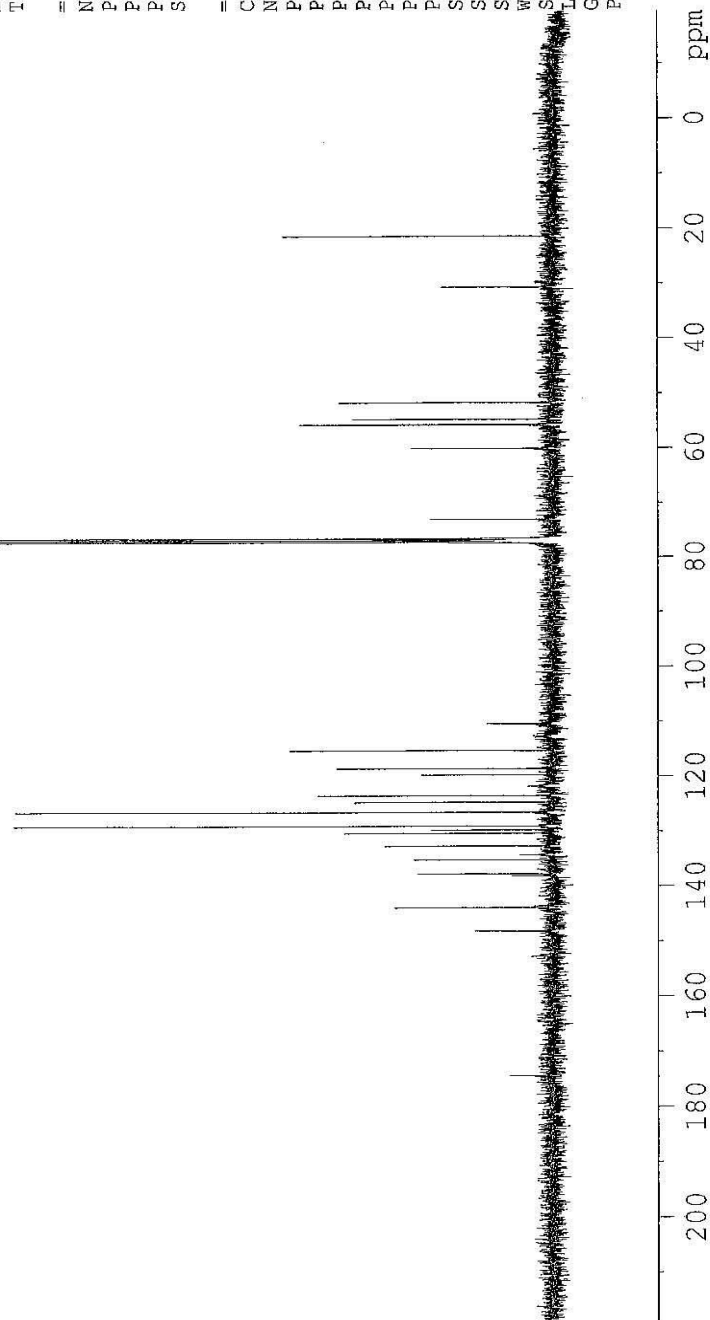

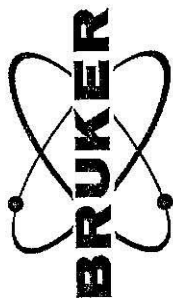

NAME JRG-348-54are  
 EXPNO 1  
 PROCNO 1  
 Date 20110727  
 Time 5.34  
 INSTRUM spect  
 PROBHD 5 mm PABBO BB-  
 PULPROG zg30  
 TD 65536  
 SOLVENT CDCl3  
 NS 4  
 DS 2  
 SWH 8223.685 Hz  
 FIDRES 0.125483 Hz  
 AQ 3.9846387 sec  
 RG 144  
 DW 60.800 usec  
 DE 6.50 usec  
 TE 295.2 K  
 D1 2.00000000 sec  
 TD0 1

===== CHANNEL f1 =====  
 NUC1 1H  
 P1 14.31 usec  
 PL1 -1.00 dB  
 PL1W 11.09959412 W  
 SFO1 400.2324716 MHz  
 SI 32768  
 SF 400.2300000 MHz  
 WDW EM  
 SSB 0  
 LB 0.30 Hz  
 GB 0  
 PC 1.00

2.247  
 8.226  
 7.537  
 7.519  
 7.518  
 7.424  
 7.421  
 7.403  
 7.390  
 7.386  
 7.370  
 7.358  
 7.356  
 7.339  
 7.321  
 7.292  
 7.029  
 7.008  
 6.752  
 6.592  
 6.571  
 6.391  
 6.387  
 6.371  
 6.367  
 5.922  
 5.917  
 5.906  
 5.902  
 5.747  
 5.732  
 4.293  
 3.848  
 3.771  
 3.619  
 3.578  
 3.212  
 2.310

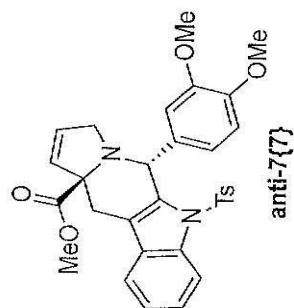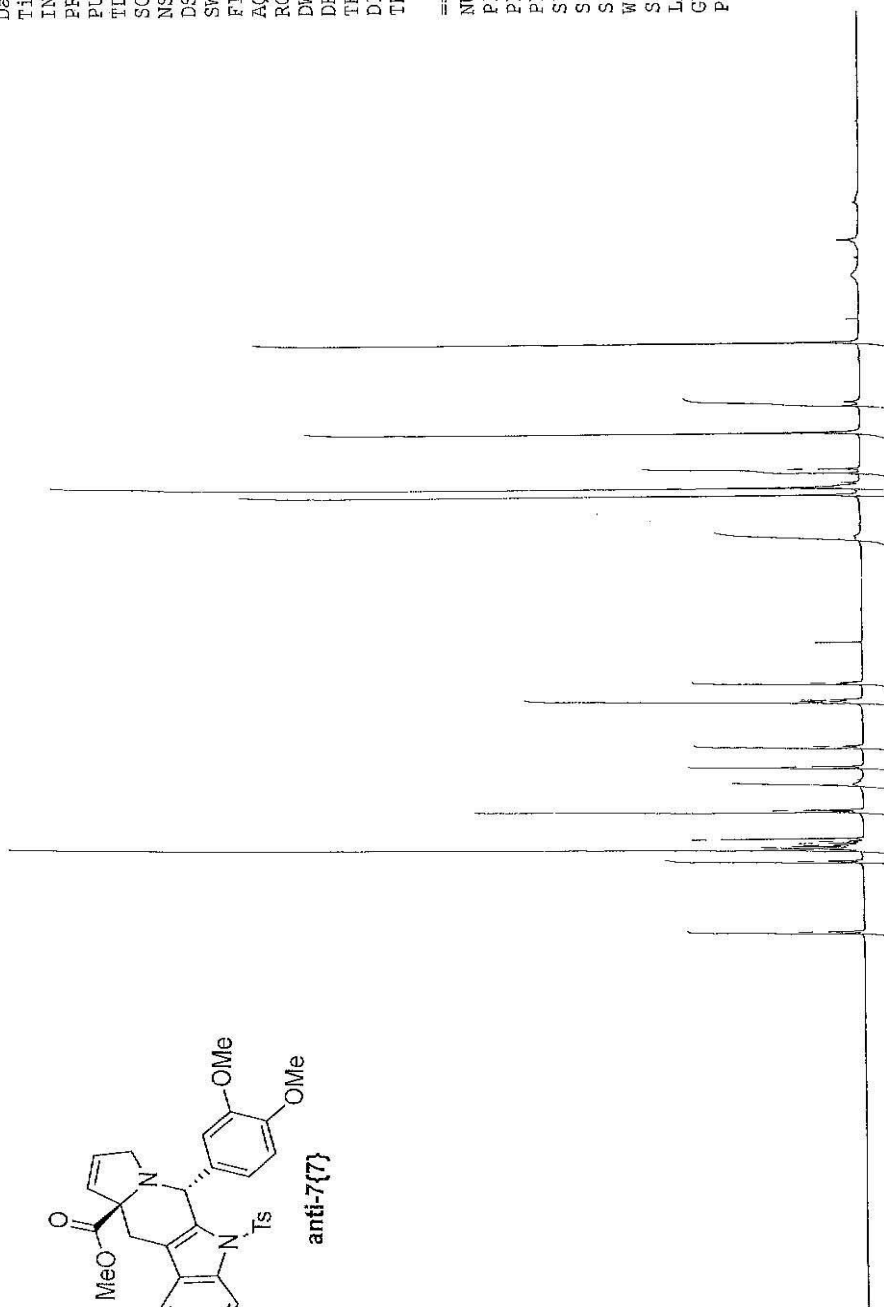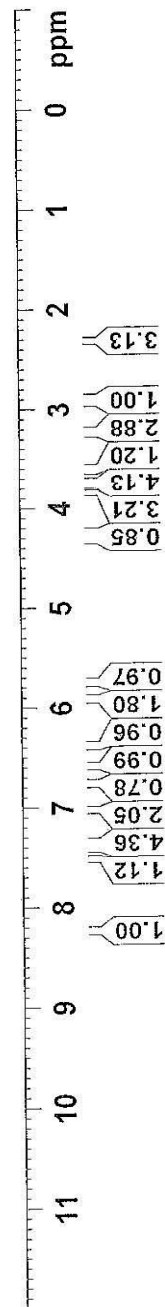

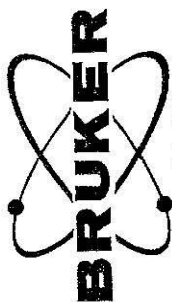

NAME JRG-348-54are  
 EXPNO 2  
 PROCNO 1  
 Date\_ 20110727  
 Time\_ 7.06  
 INSTRUM spect  
 PROBHD 5 mm PABBO BB-  
 PULPROG zgpg30  
 TD 65536  
 SOLVENT CDCl3  
 NS 1200  
 DS 4  
 SWH 24038.461 Hz  
 FIDRES 0.366798 Hz  
 AQ 1.3631988 sec  
 RG 203  
 DW 20.800 usec  
 DE 6.50 usec  
 TE 295.6 K  
 D1 3.0000000 sec  
 D11 0.0300000 sec  
 TD0 1

==== CHANNEL f1 =====  
 NUC1 13C  
 P1 10.00 usec  
 PL1 -1.59 dB  
 PL1W 51.07626343 W  
 SFO1 100.6479773 MHz

==== CHANNEL f2 =====  
 CPDPRG2 waltz16  
 NUC2 1H  
 PCPD2 75.00 usec  
 PL2 -1.00 dB  
 PL12 13.39 dB  
 PL13 20.00 dB  
 PL2W 11.09959412 W  
 PL12W 0.40393090 W  
 PL13W 0.08816721 W  
 SFO2 400.2316009 MHz  
 SI 32768  
 SF 100.6379182 MHz  
 EM 0  
 WDW 0  
 SSB 1.00 Hz  
 LB 0  
 GB 0  
 PC 1.40

— 21.46  
 — 27.20

60.19  
 58.60  
 55.82  
 55.64  
 52.37

148.56  
 148.17  
 144.47  
 136.43  
 135.71  
 133.89  
 129.33  
 128.27  
 126.55  
 124.74  
 123.41  
 120.48  
 118.56  
 117.81  
 114.58  
 111.99  
 110.16

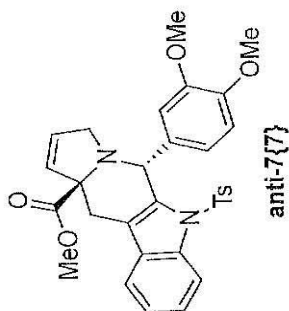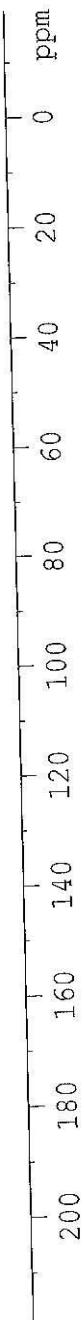

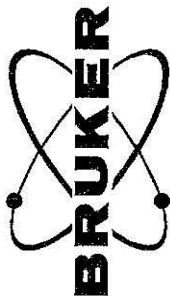

NAME JRG-348-67  
 EXPNO 1  
 PROCNO 1  
 Date\_ 20110718  
 Time 10.43  
 INSTRUM spect  
 PROBHD 5 mm Dual 13C/  
 PULPROG zg30  
 TD 32768  
 SOLVENT CDCl3  
 NS 12  
 DS 2  
 SWH 6172.839 Hz  
 FIDRES 0.188380 Hz  
 AQ 2.6542580 sec  
 RG 362  
 DW 81.000 usec  
 DE 6.50 usec  
 TE 296.2 K  
 D1 1.00000000 sec  
 TD0 1

===== CHANNEL f1 =====  
 NUC1 1H  
 P1 6.20 usec  
 PL1 4.00 dB  
 PL1W 4.57399988 W  
 SF01 300.1418535 MHz  
 SI 32768  
 SF 300.1400000 MHz  
 WDW EM  
 SSB 0  
 LB 0.30 Hz  
 GB 0  
 PC 1.00

8.080  
 7.514  
 7.488  
 7.364  
 7.338  
 7.279  
 7.223  
 7.219  
 7.199  
 7.196  
 7.173  
 7.169  
 7.156  
 7.152  
 7.145  
 7.130  
 7.127  
 7.107  
 7.103  
 5.484  
 5.462  
 5.440  
 5.390  
 5.336  
 4.814  
 4.792  
 4.775  
 4.769  
 4.753  
 4.714  
 4.559  
 4.537  
 4.521  
 4.499  
 3.827  
 3.492  
 3.439  
 3.251  
 3.199  
 0.257

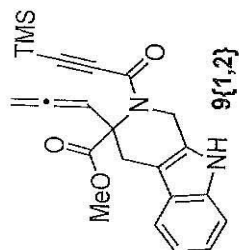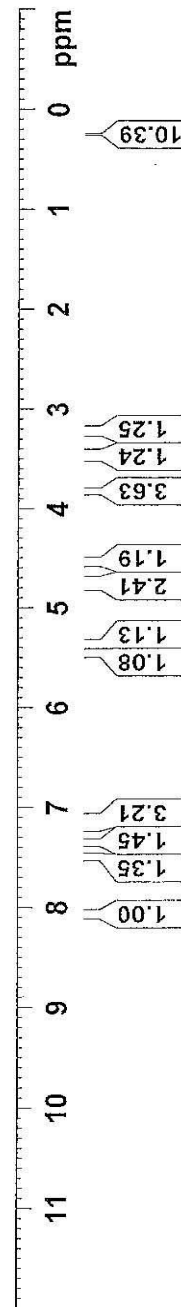

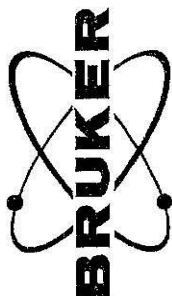

NAME JRG-348-67\_carbon

EXPNO 1

PROCNO 1

Date\_ 20110718

Time 13.47

INSTRUM spect

PROBHD 5 mm PABBO BB-

PULPROG zgpg30

TD 65536

SOLVENT CDCl3

NS 211

DS 4

SWH 24038.461 Hz

FIDRES 0.366798 Hz

AQ 1.3631988 sec

RG 203

DW 20.800 usec

DE 6.50 usec

TE 296.3 K

D1 3.00000000 sec

D11 0.03000000 sec

TD0 1

===== CHANNEL f1 =====

NUC1 13C

P1 10.00 usec

PL1 -1.59 dB

PL1W 51.07626343 W

SFO1 100.6479773 MHz

===== CHANNEL f2 =====

CPDPRG2 waltz16

NUC2 1H

PCPD2 75.00 usec

PL2 -1.00 dB

PL12 13.39 dB

PL13 20.00 dB

PL2W 11.09959412 W

PL12W 0.40393090 W

PL13W 0.08816721 W

SFO2 400.2316009 MHz

SI 32768

SF 100.6379221 MHz

WDW EM

SSB 0

LB 1.00 Hz

GB 0

PC 1.40

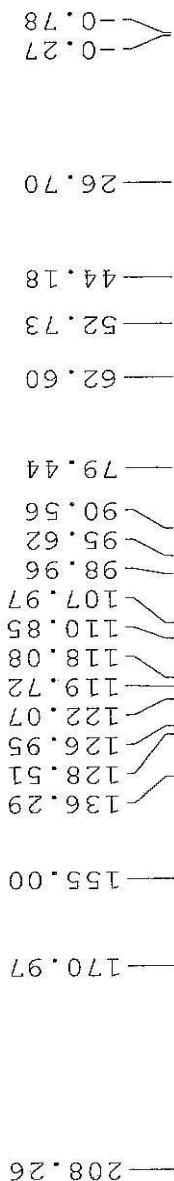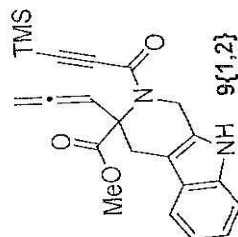

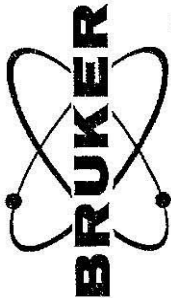

NAME JRG-348-65  
 EXPNO 1  
 PROCNO 1  
 Date\_ 20110718  
 Time 10.32  
 INSTRUM spect  
 PROBHD 5 mm Dual 13C/  
 PULPROG zg30  
 TD 32768  
 SOLVENT CDCl3  
 NS 9  
 DS 2  
 SWH 6172.839 Hz  
 FIDRES 0.188380 Hz  
 AQC 2.6542580 sec  
 RG 322.5  
 DW 81.000 usec  
 DE 6.50 usec  
 TE 296.2 K  
 D1 1.00000000 sec  
 TD0 1

===== CHANNEL f1 =====  
 NUC1 1H  
 PL 6.20 usec  
 PL1 4.00 dB  
 PLW 4.5739988 W  
 SF01 300.1418535 MHz  
 SI 32768  
 SF 300.1400000 MHz  
 EM  
 SSB 0  
 LB 0.30 Hz  
 GB 0  
 PC 1.00

8.373  
 7.497  
 7.472  
 7.369  
 7.342  
 7.206  
 7.202  
 7.182  
 7.178  
 7.156  
 7.152  
 7.138  
 7.135  
 7.113  
 7.110  
 7.089  
 7.086  
 5.488  
 5.467  
 5.445  
 5.388  
 5.333  
 4.797  
 4.775  
 4.758  
 4.737  
 4.702  
 4.554  
 4.532  
 4.515  
 4.493  
 3.815  
 3.491  
 3.439  
 3.245  
 3.194  
 3.192  
 1.999  
 1.292  
 1.283  
 0.908

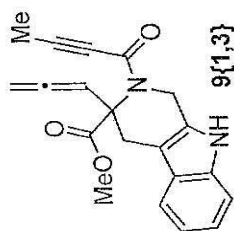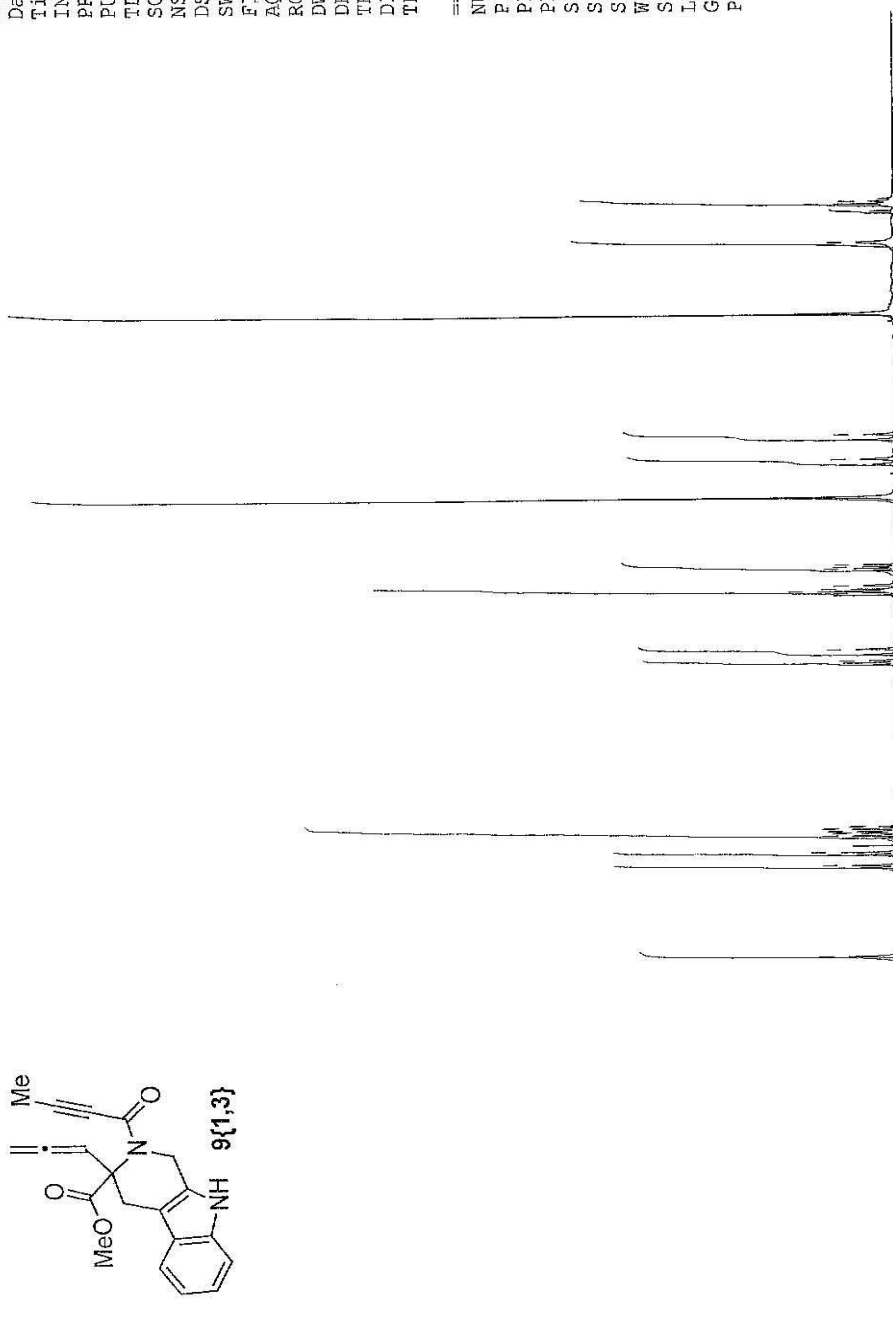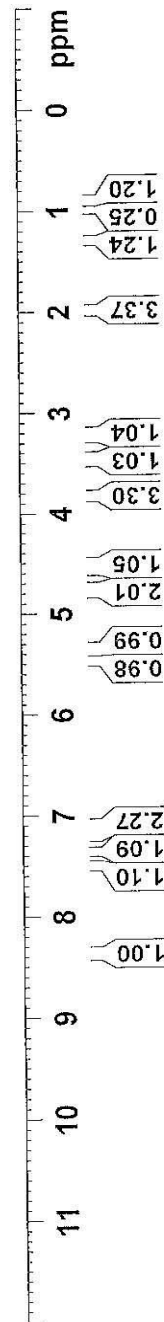



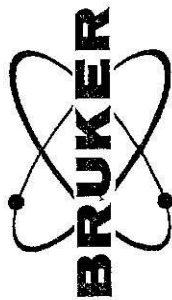

NAME JRG-348-65\_carbon

EXPNO 1

PROCNO 1

Date\_ 20110718

Time\_ 13.08

INSTRUM spect

PROBHD 5 mm PABBO BB-

PULPROG zgpg30

TD 65536

SOLVENT CDCl3

NS 91

DS 4

SWH 24038.461 Hz

FIDRES 0.366798 Hz

AQ 1.3631988 sec

RG 203

DW 20.800 usec

DE 6.50 usec

TE 296.4 K

D1 3.00000000 sec

D11 0.03000000 sec

TD0 1

==== CHANNEL f1 =====

NUC1 13C

P1 10.00 usec

PL1 -1.59 dB

PL1W 51.07626343 W

SFO1 100.6479773 MHz

==== CHANNEL f2 =====

CPDPRG2 waltz16

NUC2 1H

PCPD2 75.00 usec

PL2 -1.00 dB

PL12 13.39 dB

PL13 20.00 dB

PL2W 11.09959412 W

PL12W 0.40393090 W

PL13W 0.08816721 W

SFO2 400.2316009 MHz

SI 32768

SF 100.6379230 MHz

WDW EM

SSB 0

LB 1.00 Hz

GB 0

PC 1.40

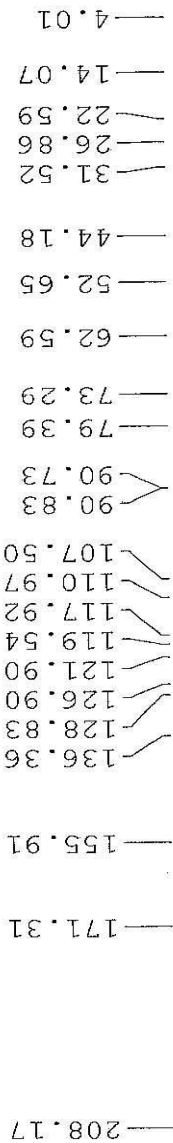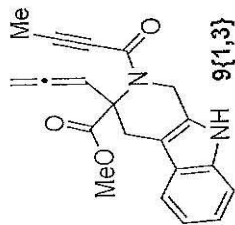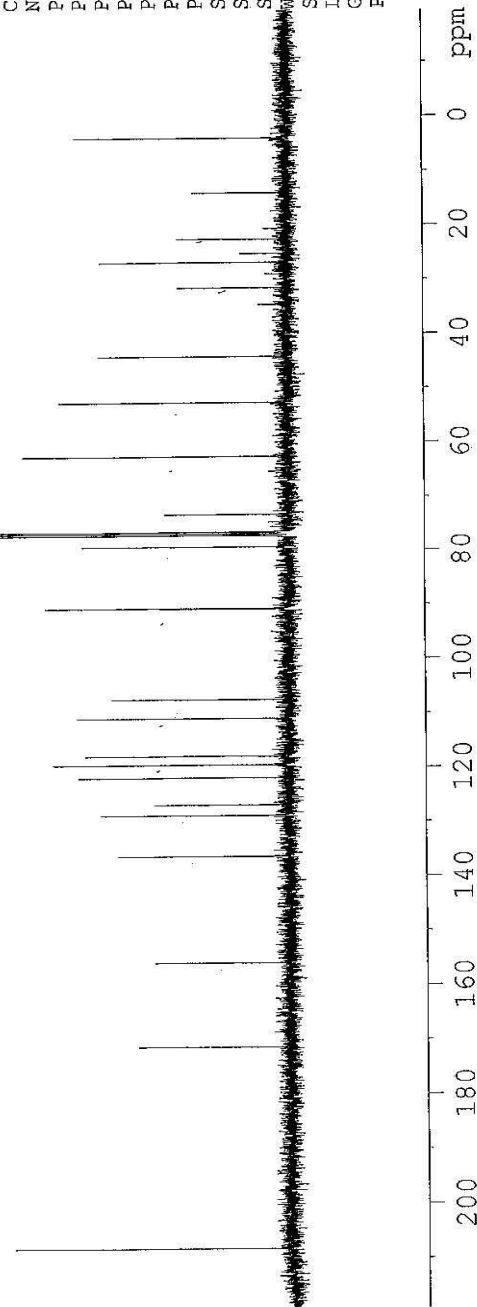

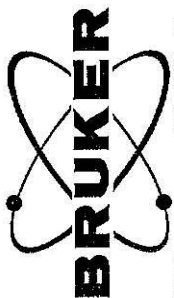

NAME JRG-348-66  
 EXPNO 1  
 PROCNO 1  
 Date\_ 20110718  
 Time\_ 10.37  
 INSTRUM spect  
 PROBHD 5 mm Dual 13C/  
 PULPROG zg30  
 TD 32768  
 SOLVENT CDCl3  
 NS 11  
 DS 2  
 SWH 6172.839 Hz  
 FIDRES 0.188380 Hz  
 AQ 2.6542580 sec  
 RG 362  
 DW 81.000 usec  
 DE 6.50 usec  
 TE 296.2 K  
 D1 1.00000000 sec  
 D11 1  
 TD0 1

===== CHANNEL f1 =====  
 NUC1 1H  
 P1 6.20 usec  
 PL1 4.00 dB  
 PL1W 4.5739988 W  
 SFO1 300.1418535 MHz  
 SI 32768  
 SF 300.1400000 MHz  
 WDW EM  
 SSB 0  
 LB 0.30 Hz  
 GB 0  
 PC 1.00

8.257  
7.502  
7.477  
7.362  
7.336  
7.185  
7.181  
7.159  
7.154  
7.142  
7.138  
7.116  
7.113  
5.458  
5.436  
5.346  
5.292  
4.798  
4.776  
4.760  
4.737  
4.679  
4.551  
4.529  
4.513  
4.491  
3.817  
3.431  
3.237  
3.184  
1.382  
1.355  
1.291  
1.281  
0.928  
0.921  
0.911  
0.906  
0.902  
0.892  
0.884  
0.882  
0.873  
0.867

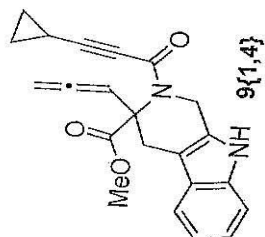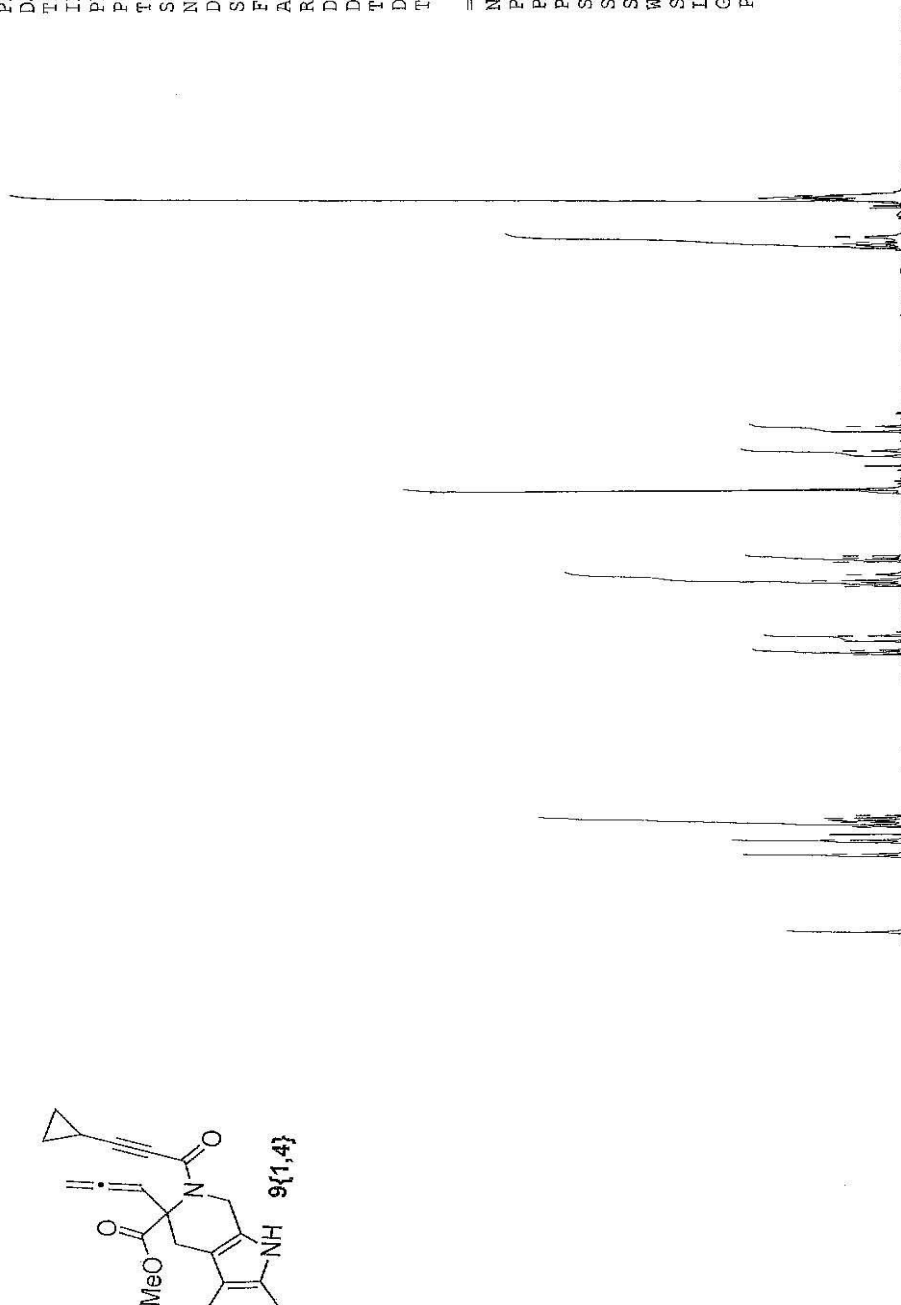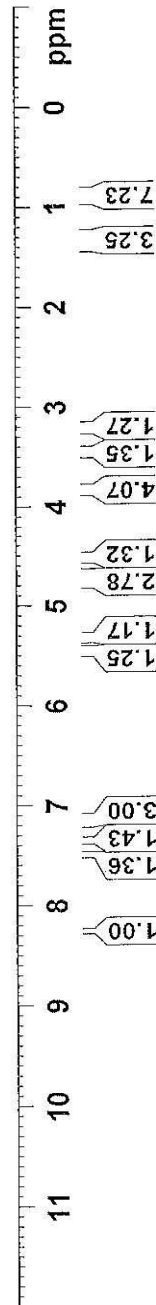

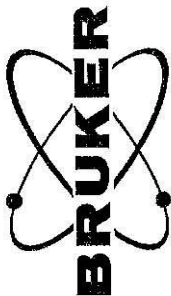

NAME JRG-348-66\_carbon  
EXNO 1  
PROCNO 1  
Date 20110718  
Time 13.20  
INSTRUM spect  
PROBHD 5 mm PABBO BB-  
PULPROG zgpg30  
TD 65536  
SOLVENT CDCl3  
NS 171  
DS 4  
SWH 24038.461 Hz  
FIDRES 0.366798 Hz  
AQ 1.3631988 sec  
RG 203  
DW 20.800 usec  
DE 6.50 usec  
TE 296.2 K  
D1 3.00000000 sec  
D11 0.03000000 sec  
TD0 1

===== CHANNEL f1 =====  
NUC1 13C  
P1 10.00 usec  
PL1 -1.59 dB  
PL1W 51.07626343 W  
SFO1 100.6479773 MHz

===== CHANNEL f2 =====  
CPDPRG2 waltz16  
NUC2 1H  
PCPD2 75.00 usec  
PL2 -1.00 dB  
PL12 13.39 dB  
PL13 20.00 dB  
PL2W 11.09959412 W  
PL12W 0.40393090 W  
PL13W 0.08816721 W  
SFO2 400.2316009 MHz  
SI 32768  
SF 100.6379203 MHz  
WDW EM  
SSB 0  
LB 1.00 Hz  
GB 0  
PC 1.40

208.21  
171.28  
155.95  
136.34  
128.80  
126.97  
121.94  
119.61  
118.01  
110.92  
107.73  
98.29  
90.77  
79.38  
69.25  
62.55  
52.69  
44.16  
31.55  
26.80  
22.62  
14.09  
9.15  
-0.38

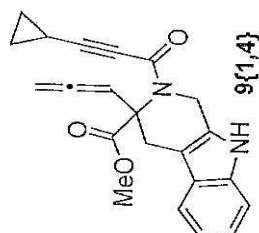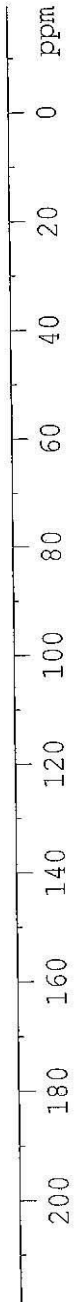

Supplement: Additional file 1 [file 1860-5397-8-117-S1.pdf]
